# Supplementary material for: The main stage of recovery after the end-Permian mass extinction: taxonomic rediversification and ecologic reorganization of marine level-bottom communities during the Middle Triassic
Source: PeerJ. 2021 Jul 20;9:e11654. doi: 10.7717/peerj.11654 (PMC8300500; doi:10.7717/peerj.11654)
Supplement: Supplemental Information 1 — (A) List of lithological units used for this study including information about their country, age and faunal content. (B) species list including information about their occurrences, ecological guild, taxon and references. (C) Reference list. [file peerj-09-11654-s001.xlsx]

## Sheet: Content
Lithological units
List of lithological units used in this study including information about the country, age, number of species per taxa and ecological guild, number of macroalgae species and gastropod/bivalve-ratio
Legend:	associated with carbonate platforms
Species list
List of species used in this study including information about their occurrences, ecological guild, taxon and studies mentioning them
Legend:	species names come from underlined studies
References

## Sheet: Lithological units
Lithological unit	Country	Age	Environment(s)	total species richness	Number of species per taxon													Number of species per ecological guild													gastropod/bivalve-ratio	total number of dasycladacean algae species	literature for dasycladacean algae species
					bivalves	gastropods	brachiopods	crinoids	echinoids	asteroids	bryozoans	crustaceans	microconchids	ophiuroids	serpulids	scaphopods	polyplacophorans	shallow to moderately deep infaunal suspension-feeders	shallow infaunal deposit-feeders	deep infaunal suspension-feeders	endobyssate suspension-feeders	epibyssate suspension-feeders	free-lying suspension-feeders	cemented epifaunal suspension-feeders	pedunculate suspension-feeders	epifaunal herbivores and/or detritus-feeders	epifaunal carnivores	erected epifaunal suspension-feeders	epifaunal detrivore-suspension-feeders	ecology uncertain
Schlernplateau beds	Italy	late Longobardian-early Julian (Urlichs, 2014)	lagoon	79	26	47		2	4									12			3	3	6	1		51		2		2	1.80769
Erfurt Formation ("Lower Keuper")	Germany	early Longobardian (stratigraphic table of Germany 2016)	epeiric delta	68	40	22	5						1					23	2	2	5	7	2	2	2	22				1	0.55
Meissner Formation (upper part from "Upper Muschelkalk")	Germany	late Illyrian-late Fassanian (stratigraphic table of Germany 2016)	mid-ramp	230	104	80	10	2	5	2		11	1	9	4	2		46	10	3	17	18	1	16	4	85	13	2	9	6	0.769231
Marmolada Limestone	Italy	middle Illyrian-middle Longobardian (Brack and Rieber, 1993; Urlichs, 2014)	lagoon/platform interior	268	39	199	24	2	3			1						10			2	14	3	2	23	202	1	2		9	5.10256	8	Salomon (1895), Ogilvie Gordon (1927), Granier & Grgasović (2000)
Latemar Limestone	Italy	middle Illyrian-early Longobardian (Brack et al., 1996; Manfrin et al., 2005; Balini et al., 2010)	lagoon/platform interior	156	38	101	17											5	1			27	5		17	101					2.65789	11	Russo et al. (2000), Granier & Grgasović (2000), Emmerich et al. (2005), Piros & Preto (2008)
Trochitenkalk Formation (lower part of "Upper Muschelkalk")	Germany	middle Illyrian (stratigraphic table of Germany 2016)	inner ramp	195	85	71	5	2	5	1		10	2	9	3	2		32	9	3	14	18	1	15	2	76	11	2	9	3	0.835294	1	Flügel und Hagdorn (1993), Granier & Grgasović (2000)
Karlstadt Formation, Heilbronn Formation, Diemel Formation ("Middle Muschelkalk")	Germany	early Illyrian (stratigraphic table of Germany 2016)	lagoon/sabkha	73	28	37	3	1	1			1	1		1			15	2		5	5	1	3	2	38	1	1			1.32143	3	Schmidt (1928, 1938)
Leidapo Member	China	late Pelsonian-early Illyrian (Stiller and Bucher, 2008)	mid-ramp	294	110	127	25	7	15		4				3	3		19	8		15	52	2	27	22	142		7			1.15455
Zuhanya Limestone	Hungary	late Pelsonian-early Illyrian (Foster and Sebe, 2017)	mid- to outer ramp and outer ramp	16	11		1	2	1							1		4	1		2	2	1	1	1	1		2		1	0
Felsöörs Formation	Hungary	Pelsonian-Illyrian (Vörös, 2003)	outer ramp	75	39		35	1										6	2	1	3	19	4	2	33			1		4	0
Lapis Limestone	Hungary	late Bithynian-early Pelsonian (Foster and Sebe, 2017)	mid-ramp	13	8	1		3					1					4			2	2		1		1		3			0.125
Jena Formation ("Lower Muschelkalk")	Germany	middle Bithynian-late Pelsonian (stratigraphic table of Germany 2016)	inner ramp	243	100	100	11	12	1	1		6	2	4	2	3	1	36	10	6	18	17	1	16	7	101	7	12	4	8	1	1	Schmidt (1928, 1938)
Tubiphytes-Limestone Member	Romania	Bithynian (Popa et al., 2014)	mid-ramp	84	51	21	12											5		4	7	24	6	1	12	21				4	0.411765
Viganvar Limestone	Hungary	late Aegean-early Bithynian (Foster and Sebe, 2017)	mid-ramp	13	6	4	1	1					1					4			3			1		4		1			0.666667
Röt Formation ("Upper Buntsandstein")	Germany	early Aegean-early Bithynian (stratigraphic table of Germany 2016)	playa	49	36	4	2	1				6						19	1	2	8	3	1	3		4	6	1		1	0.111111
San Lucano Member	Italy	late Spathian (Hofmann et al., 2015; Foster et al., 2017b)	inner ramp	11	7	4												5			2					4					0.571429
Cencenighe Member	Italy	middle Spathian (Hofmann et al., 2015; Foster et al., 2017b)	inner ramp	28	23	4								1				8			6	8	1			4			1		0.173913
Szin Marl Formation	Hungary	early-middle Spathian (Foster et al., 2015)	inner, mid- and outer ramp	7	5	2												3			1	1				2					0.4
Val Badia Member	Italy	early Spathian (Hofmann et al., 2015; Foster et al., 2017b)	inner and mid-ramp	22	17	4								1				7			3	6	1			4			1		0.235294
Lower Shale Unit (Thaynes Group, "Paris Biota")	USA	early Spathian (Brayard et al., 2017)	mid-ramp	12	5		3	1				2		1				2				4		2			1	1	1	1	0
Csopak Marl	Hungary	Spathian (Broglio Loriga et al., 1990)	mid-ramp	20	14	4	1	1										7			2	5	1			4		1			0.285714
Virgin Formation	USA	Spathian (Hofmann et al., 2013b)	lagoon, inner ramp and inner to mid-ramp	46	30	7	5	2	1				1					14		2	4	11	1	3	3	8		2			0.233333
Sinbad Formation	USA	Smithian (Hofmann et al. 2014)	inner ramp and inner to mid-ramp	48	15	29	1		1	1						1		7	1		1	7	1			30	1				1.93333
Hidegkut Formation	Hungary	Smithian (Broglio Loriga et al., 1990)	mid-ramp	16	15	1												6			1	7	1			1					0.0666667
Campil Member	USA	Smithian (Hofmann et al., 2015; Foster et al., 2017b)	inner and mid-ramp	23	21	2												7			3	9	2			2					0.0952381
Gastropod Oolithe	Italy	late Dienerian-early Smithian (Hofmann et al., 2015; Foster et al., 2017b)	inner and mid-ramp	14	9	4	1											5			1	4				4					0.444444
Zhitkov Formation	Russia	Dienerian-Smithian (Shigeta et al., 2009)	outer ramp and basin	21	11	7	1	1								1		6	1		1	3	1		1	7		1			0.636364
Seis Member	Italy	late Griesbachian-late Dienerian (Hofmann et al., 2015; Foster et al., 2017b)	inner, mid- and outer ramp	22	17	4	1											9			1	8				4					0.235294
Bodvaszilas Sandstone Formation	Hungary	middle Griesbachian-Smithian (Foster et al., 2015)	inner and mid-ramp	12	11								1					4				7		1							0
Luolou Formation	China	middle Griesbachian (Hautmann et al., 2015)	inner to mid-ramp	30	20	5	3						1		1			9	1		4	7		2	2	5					0.25
Andraz Horizon	Italy	middle Griesbachian (Foster et al., 2017)	mid-ramp	3	3													2				1
Mazzin Member	Italy	early-middle Griesbachian (Hofmann et al., 2015; Foster et al., 2017b)	inner, mid- and outer ramp	16	11	3	1								1			5			1	6		1		3					0.272727
Daye Formation (microbialite unit at its base)	China	early Griesbachian (Foster et al., 2019)	mid-ramp	42	26	11	3	1					1					8	2		10	7		2	1	11		1			0.423077
Deltadalen Member	Norway (Spitzbergen)	early Griesbachian (Foster et al., 2017a)	basin	14	9	4	1											3	3			1		1		4				2	0.444444
Dinwoody Formation	USA	Griesbachian-Dienerian (Hofmann et al., 2013a)	inner and outer ramp	19	15	2	2											5				11			1	2					0.133333
Lazurnaya Bay Formation	Russia	Griesbachian (Shigeta et al., 2009)	very flat/terrestrial, mid- and outer ramp	27	13	6	8											5			2	6		1	6	6				1	0.461538
Tesero Oolithe	Italy	Changsinghian-early Griesbachian (Hofmann et al., 2015; Foster et al., 2017b)	inner to mid-ramp	13	4	2	5		1						1						2	2		1	5	3					0.5

## Sheet: Species list
Species	Taxon	Lithological unit(s)	Literature	Ecologic guild
"Cidaris" bangtoupoensis STILLER, 2001	Echinoid	Leidapo Mb.	Stiller (2001)	epifaunal herbivore and/or detritus-feeder
"Cidaris" fangchui STILLER, 2001	Echinoid	Leidapo Mb.	Stiller (2001)	epifaunal herbivore and/or detritus-feeder
"Cidaris" gu STILLER, 2001	Echinoid	Leidapo Mb.	Stiller (2001)	epifaunal herbivore and/or detritus-feeder
"Cidaris" lineola (BATHER, 1911)	Echinoid	Leidapo Mb.	Stiller (2001)	epifaunal herbivore and/or detritus-feeder
"Cidaris" venustespinosa STILLER, 2001	Echinoid	Leidapo Mb.	Stiller (2001)	epifaunal herbivore and/or detritus-feeder
"Cidaris" wachangpoensis STILLER, 2001	Echinoid	Leidapo Mb.	Stiller (2001)	epifaunal herbivore and/or detritus-feeder
"Cidaris" wissmanni (DESOR in AGASSIZ & DESOR, 1846)	Echinoid	Leidapo Mb.	Stiller (2001)	epifaunal herbivore and/or detritus-feeder
"Cryptonerita" sp.	Gastropod	Leidapo Mb.	Yin & Yochelson (1983b)	epifaunal herbivore and/or detritus-feeder
"Cyrtina" sp.	Brachiopod	Leidapo Mb.	Stiller (2001)	cemented epifaunal suspension-feeder
"Homomya" sp.	Bivalve	Cencenighe Mb.	Broglio Loriga et al. (1990)	shallow to moderately deep infaunal suspension-feeder
"Loxonema" aequale VON WÖHRMANN & KOKEN, 1892	Gastropod	Schlernplateau beds	Wöhrmann & Koken (1892), Friesenbichler et al. (2019b)	epifaunal herbivore and/or detritus-feeder
"Loxonema" lineatum VON WÖHRMANN & KOKEN, 1892	Gastropod	Schlernplateau beds	Wöhrmann & Koken (1892), Friesenbichler et al. (2019b)	epifaunal herbivore and/or detritus-feeder
"Mesodiadema"? sp.	Echinoid	Leidapo Mb.	Stiller (2001)	epifaunal herbivore and/or detritus-feeder
"Miocidaris" indet.	Echinoid	Leidapo Mb.	Stiller (2001)	epifaunal herbivore and/or detritus-feeder
"Miocidaris" sp. A	Echinoid	Leidapo Mb.	Stiller (2001)	epifaunal herbivore and/or detritus-feeder
"Miocidaris" sp. B	Echinoid	Leidapo Mb.	Stiller (2001)	epifaunal herbivore and/or detritus-feeder
"Miocidaris" sp. C	Echinoid	Leidapo Mb.	Stiller (2001)	epifaunal herbivore and/or detritus-feeder
"Miocidaris" sp. D	Echinoid	Leidapo Mb.	Stiller (2001)	epifaunal herbivore and/or detritus-feeder
"Miocidaris" sp. E	Echinoid	Leidapo Mb.	Stiller (2001)	epifaunal herbivore and/or detritus-feeder
"Modiolus" sp.	Bivalve	Lazurnaya Bay Fm.	Shigeta et al. (2009)	endobyssate suspension-feeder
"Pecten" volaris (BITTNER, 1902)	Bivalve	Tubiphytes-Lmst. Mb.	Friesenbichler et al. (2019a)	epibyssate suspension-feeder
"Pleuromya" sp.	Bivalve	Viganvar, Lapis Lmst., Zuhanya Lmst.	Foster & Sebe (2017)	shallow to moderately deep infaunal suspension-feeder
"Rissoa" tirolensis VON WÖHRMANN & KOKEN, 1892	Gastropod	Schlernplateau beds	Wöhrmann & Koken (1892), Blaschke (1905), Friesenbichler et al. (2019b)	epifaunal herbivore and/or detritus-feeder
"Solenomorpha" sp.	Bivalve	Latemar Lmst.	Friesenbichler et al. (unpublished data)	shallow to moderately deep infaunal suspension-feeder
"Spirorbis" qingyani STILLER, 2000	Serpulid	Leidapo Mb.	Stiller (2001)	cemented epifaunal suspension-feeder
"Triadocidaris" sp.	Echinoid	Leidapo Mb.	Stiller (2001)	epifaunal herbivore and/or detritus-feeder
"Trochus" pseudoniso VON WÖHRMANN & KOKEN, 1892	Gastropod	Schlernplateau beds	Wöhrmann & Koken (1892), Friesenbichler et al. (2019b)	epifaunal herbivore and/or detritus-feeder
"Trochus" sp.	Gastropod	Leidapo Mb.	Stiller (2001)	epifaunal herbivore and/or detritus-feeder
"Unionites" brevis (VON SCHAUROTH, 1857)	Bivalve	Meissner Fm., Erfurt Fm.	Schmidt (1928, 1938), Urlichs (1992)	shallow to moderately deep infaunal suspension-feeder
"Unionites" donacinus (VON SCHLOTHEIM, 1820)	Bivalve	Erfurt Fm.	Schmidt (1928, 1938), Urlichs (1992)	shallow to moderately deep infaunal suspension-feeder
"Worthenia" ("Worthenia") esinensis KITTL, 1899	Gastropod	Leidapo Mb.	Yin & Yochelson (1983a)	epifaunal herbivore and/or detritus-feeder
?Pseudomonotis dubiosa BITTNER, 1901	Bivalve	Hidegkut Fm.	Broglio Loriga et al. (1990)	epibyssate suspension-feeder
“Palaeoneilo” minutissima (FRECH, 1904)	Bivalve	Felsöörs Fm.	Vörös (2003)	shallow infaunal deposit-feeder
Abrekia sulcata DAGYS, 1974	Brachiopod	Lazurnaya Bay Fm., Zhitkov Fm.	Shigeta et al. (2009)	pedunculate suspension-feeder
Abrekopsis depressispirus (BATTEN & STOKES, 1986)	Gastropod	Sinbad Fm., Lazurnaya Bay Fm., Zhitkov Fm., Virgin Fm.	Batten & Stokes (1986), Shigeta et al. (2009), McGowan et al. (2009)	epifaunal herbivore and/or detritus-feeder
Acilia gracilis HÄBERLE, 1908	Gastropod	"Middle Muschelkalk", Latemar Lmst.	Schmidt (1928, 1938), Häberle (1908)	epifaunal herbivore and/or detritus-feeder
Acroura armata PICARD, 1886	Ophiuroid	Trochitenkalk Fm., Meissner Fm.	Schmidt (1928, 1938)	epifaunal detritivore-suspension-feeder
Acroura coronaeformis PICARD, 1858	Ophiuroid	Trochitenkalk Fm., Meissner Fm.	Schmidt (1928, 1938)	epifaunal detritivore-suspension-feeder
Acroura pellioperta PICARD, 1889	Ophiuroid	Trochitenkalk Fm., Meissner Fm.	Schmidt (1928, 1938)	epifaunal detritivore-suspension-feeder
Acroura prisca (GOLDFUSS, 1833)	Ophiuroid	Jena Fm., Trochitenkalk Fm., Meissner Fm.	Schmidt (1928, 1938)	epifaunal detritivore-suspension-feeder
Acroura squamosa (PICARD 1858)	Ophiuroid	Trochitenkalk Fm., Meissner Fm.	Schmidt (1928, 1938)	epifaunal detritivore-suspension-feeder
Actaeonina alsatica KOKEN	Gastropod	"Middle Muschelkalk"	Schmidt (1928, 1938)	epifaunal herbivore and/or detritus-feeder
Actaeonina cf. mediocalcis HOHENSTEIN, 1913	Gastropod	Trochitenkalk Fm.	Ockert (1993)	epifaunal herbivore and/or detritus-feeder
Actaeonina cf. stuorense BANDEL,1994	Gastropod	Leidapo Mb.	Stiller (2001)	epifaunal herbivore and/or detritus-feeder
Actaeonina germanica KOKEN, 1898	Gastropod	"Middle Muschelkalk", Trochitenkalk Fm., Meissner Fm.	Schmidt (1928, 1938)	epifaunal herbivore and/or detritus-feeder
Actaeonina gipsata ZELLER, 1907	Gastropod	Erfurt Fm.	Schmidt (1928, 1938)	epifaunal herbivore and/or detritus-feeder
Actaeonina gracilis HOHENSTEIN, 1913	Gastropod	Röt Fm.	Schmidt (1928, 1938)	epifaunal herbivore and/or detritus-feeder
Actaeonina kokeni (HOHENSTEIN, 1913)	Gastropod	Trochitenkalk Fm., "Middle Muschelkalk"	Schmidt (1928, 1938), Ockert (1993)	epifaunal herbivore and/or detritus-feeder
Actaeonina mediocalcis HOHENSTEIN, 1913	Gastropod	"Middle Muschelkalk"	Schmidt (1928, 1938)	epifaunal herbivore and/or detritus-feeder
Actaeonina ovata PICARD, 1903	Gastropod	Erfurt Fm.	Schmidt (1928, 1938)	epifaunal herbivore and/or detritus-feeder
Actaeonina scalaris HOHENSTEIN, 1913	Gastropod	"Middle Muschelkalk", Meissner Fm.	Schmidt (1928, 1938)	epifaunal herbivore and/or detritus-feeder
Actaeonina sp. HOHENSTEIN, 1913	Gastropod	"Middle Muschelkalk"	Schmidt (1928, 1938)	epifaunal herbivore and/or detritus-feeder
Actaeonina vilae HOHENSTEIN, 1913	Gastropod	"Middle Muschelkalk"	Schmidt (1928, 1938)	epifaunal herbivore and/or detritus-feeder
Actaeonina? brevis BÖHM, 1895	Gastropod	Marmolada Lmst.	Böhm (1895)	epifaunal herbivore and/or detritus-feeder
Adeorbis liscaviensis PICARD, 1903	Gastropod	Jena Fm.	Schmidt (1928, 1938)	epifaunal herbivore and/or detritus-feeder
Adygella elongata YANG & XU, 1966	Brachiopod	Leidapo Mb.	Stiller (2001)	pedunculate suspension-feeder
Adygella sp.	Brachiopod	Tubiphytes-Lmst. Mb.	Grădinaru & Gaetani (2019)	pedunculate suspension-feeder
Aeger lehmanni (LANGENHAN, 1910)	Crustacean	Trochitenkalk Fm., Meissner Fm.	Schmidt (1928, 1938)	epifaunal carnivore
Allocosmia aff. grandis (HOERNES, 1855)	Gastropod	Leidapo Mb.	Stiller (2001)	epifaunal herbivore and/or detritus-feeder
Allocosmia cf. turricula (ASSMANN)	Gastropod	Leidapo Mb.	Stiller (2001)	epifaunal herbivore and/or detritus-feeder
Amauropsis (Prostylifer) macra BÖHM, 1895	Gastropod	Latemar Lmst., Marmolada Lmst.	Häberle (1908), Böhm (1895)	epifaunal herbivore and/or detritus-feeder
Amauropsis sanctaecrucis LAUBE, 1868	Gastropod	Latemar Lmst.	Friesenbichler et al. (unpublished data)	epifaunal herbivore and/or detritus-feeder
Amauropsis sp.	Gastropod	Schlernplateau beds	Wöhrmann & Koken (1892)	epifaunal herbivore and/or detritus-feeder
Amphijanira n. sp. A	Bivalve	Leidapo Mb.	Stiller (2001)	epibyssate suspension-feeder
Amphijanira n. sp. B	Bivalve	Leidapo Mb.	Stiller (2001)	epibyssate suspension-feeder
Amphijanira? aff. landrana (BITTNER, 1895)	Bivalve	Tubiphytes-Lmst. Mb.	Friesenbichler et al. (2019a)	epibyssate suspension-feeder
Ampullina pullula (QUENSTEDT)	Gastropod	Jena Fm., "Middle Muschelkalk", Trochitenkalk Fm., Meissner Fm.	Schmidt (1928, 1938), Ockert (1993)	epifaunal herbivore and/or detritus-feeder
Angularia cf. subpleurotomaria (MÜNSTER, 1841)	Gastropod	Latemar Lmst.	Häberle (1908)	epifaunal herbivore and/or detritus-feeder
Angularia marginata VON WÖHRMANN & KOKEN, 1892	Gastropod	Schlernplateau beds	Wöhrmann & Koken (1892)	epifaunal herbivore and/or detritus-feeder
Angustothyris angustaeformis (BÖCKH, 1873)	Brachiopod	Felsöörs Fm., Leidapo Mb., Marmolada Lmst.	Vörös (2003), Stiller (2001), Salomon (1895)	pedunculate suspension-feeder
Angustothyris? sp.	Brachiopod	Felsöörs Fm.	Vörös (2003)	pedunculate suspension-feeder
Anomalodesmata indet.	Bivalve	Latemar Lmst.	Friesenbichler et al. (unpublished data)	shallow infaunal deposit-feeder
Anomalodesmata sp. A	Bivalve	Tubiphytes-Lmst. Mb.	Friesenbichler et al. (2019a)	deep infaunal suspension-feeder
Anomalodesmata sp. B	Bivalve	Tubiphytes-Lmst. Mb.	Friesenbichler et al. (2019a)	deep infaunal suspension-feeder
Anomalodesmata sp. C	Bivalve	Tubiphytes-Lmst. Mb.	Friesenbichler et al. (2019a)	deep infaunal suspension-feeder
Anomia alta GIEBEL, 1856	Bivalve	Jena Fm.	Schmidt (1928, 1938)	ecology unsure
Anoplophora albertii ASSMANN, 1915	Bivalve	Meissner Fm.	Schmidt (1928, 1938)	shallow to moderately deep infaunal suspension-feeder
Anoplophora gregaria (QUENSTEDT, 1872)	Bivalve	Trochitenkalk Fm., Meissner Fm.	Schmidt (1928, 1938)	shallow to moderately deep infaunal suspension-feeder
Anoptychia eotriassica BATTEN & STOKES, 1986	Gastropod	Sinbad Fm.	Batten & Stokes (1986)	epifaunal herbivore and/or detritus-feeder
Aplocoma agassizi (MÜNSTER, 1839)	Ophiuroid	Trochitenkalk Fm., Meissner Fm.	Schmidt (1928, 1938), Hagdorn & Ockert (1993)	epifaunal detritivore-suspension-feeder
Araxathyris? sp.	Brachiopod	Tesero Oolithe	Broglio Loriga et al. (1986)	pedunculate suspension-feeder
Arca crassa ASSMANN, 1937	Bivalve	Jena Fm.	Schmidt (1928, 1938)	ecology unsure
Arcavicula (Arcavicula) guizhouensis (CHEN, 1976)	Bivalve	Leidapo Mb.	Stiller (2001), Komatsu et al. (2004)	epibyssate suspension-feeder
Arcavicula (Arcavicula) n. sp.	Bivalve	Leidapo Mb.	Stiller (2001)	epibyssate suspension-feeder
Arcavicula (n. subgen.) n. sp.	Bivalve	Leidapo Mb.	Stiller (2001)	epibyssate suspension-feeder
Arcomya? n. sp. ex aff. Cercomya? crassa TOMMASI, 1890	Bivalve	Marmolada Lmst.	Salomon (1895)	ecology unsure
Arcomya? sp.	Bivalve	Virgin Fm.	Hautmann et al. (2013)	deep infaunal suspension-feeder
Asoella sp.	Bivalve	Latemar Lmst.	Friesenbichler et al. (unpublished data)	epibyssate suspension-feeder
Asoella? sp.	Bivalve	Tubiphytes-Lmst. Mb.	Friesenbichler et al. (2019a)	epibyssate suspension-feeder
Aspidogaster limicola (KÖNIG, 1920)	Crustacean	Trochitenkalk Fm., Meissner Fm.	Schmidt (1928, 1938), Hagdorn & Ockert (1993), Ockert (1993)	epifaunal carnivore
Aspidura ludeni HAGENOW, 1846	Ophiuroid	Jena Fm., Trochitenkalk Fm., Meissner Fm.	Schmidt (1928, 1938)	epifaunal detritivore-suspension-feeder
Aspidura scutellata (BLUMENBACH, 1804)	Ophiuroid	Trochitenkalk Fm., Meissner Fm.	Schmidt (1928, 1938), Hagdorn & Ockert (1993), Ockert (1993)	epifaunal detritivore-suspension-feeder
Aspidura sp.	Ophiuroid	Jena Fm.	Schmidt (1928, 1938)	epifaunal detritivore-suspension-feeder
Astarte emacerata YIN, 1974	Bivalve	Leidapo Mb.	Stiller (2001), Komatsu et al. (2004)	shallow to moderately deep infaunal suspension-feeder
Astarte subaequilatera ROEMER, 1851	Bivalve	Trochitenkalk Fm., Meissner Fm.	Schmidt (1928, 1938), Busse (1972)	shallow to moderately deep infaunal suspension-feeder
Astarte triasina ROEMER, 1851	Bivalve	Röt Fm., Jena Fm., Trochitenkalk Fm., Meissner Fm.	Schmidt (1928, 1938), Busse (1972)	shallow to moderately deep infaunal suspension-feeder
Astarte willebadessensis ROEMER, 1851	Bivalve	Trochitenkalk Fm., Meissner Fm.	Schmidt (1928, 1938), Busse (1972)	shallow to moderately deep infaunal suspension-feeder
Astarte? cf. emacerata YIN, 1974	Bivalve	Leidapo Mb.	Stiller (2001)	shallow to moderately deep infaunal suspension-feeder
Astartella sp.	Bivalve	Lower Shale Unit	Brayard et al. (2017)	shallow to moderately deep infaunal suspension-feeder
Astartella? sp.	Bivalve	Luolou Fm.	Hautmann et al. (2015)	shallow to moderately deep infaunal suspension-feeder
Astartella? stefaniae HAUTMANN, BAGHERPOUR, BROSSE, FRISK, HOFMANN, BAUD, NÜTZEL, GOUDEMAND & BUCHER, 2015	Bivalve	Luolou Fm., Daye Fm.	Hautmann et al. (2015), Foster et al. (2019)	shallow to moderately deep infaunal suspension-feeder
Astartellopsis nuda GOLDFUSS	Bivalve	Trochitenkalk Fm., Meissner Fm.	Hagdorn und Ockert (1993)	shallow to moderately deep infaunal suspension-feeder
Astartidae indet.	Bivalve	Virgin Fm.	Hofmann et al. (2013b)	shallow to moderately deep infaunal suspension-feeder
Astartopis? sp.	Bivalve	Luolou Fm.	Hautmann et al. (2015)	shallow to moderately deep infaunal suspension-feeder
Asterias cilicia (QUENSTEDT, 1852)	Asteroid	Meissner Fm.	Wagner (1897)	epifaunal carnivore
Atomodesma? hautmanni FOSTER, LEHRMANN, HIRTZ, WHITE, YU, LI & MARTINDALE, 2019	Bivalve	Daye Fm.	Foster et al. (2019)	endobyssate suspension-feeder
Atomodesma sp.	Bivalve	Luolou Fm.	Hautmann et al. (2015)	endobyssate suspension-feeder
Atrina multicostata FRIESENBICHLER, HAUTMANN, GRĂDINARU & BUCHER, 2019	Bivalve	Tubiphytes-Lmst. Mb.	Friesenbichler et al. (2019a)	endobyssate suspension-feeder
Atrina n. sp.	Bivalve	Leidapo Mb.	Stiller (2001)	endobyssate suspension-feeder
Aulacothyris angusta VON SCHLOTHEIM, 1820	Brachiopod	Jena Fm.	Schmidt (1928, 1938)	pedunculate suspension-feeder
Aulacothyris angustaeformis YANG & XU, 1966	Brachiopod	Leidapo Mb.	Stiller (2001)	pedunculate suspension-feeder
Austrotindaria antiqua FOSTER, DANISE & TWITCHETT, 2017	Bivalve	Deltadalen Mb.	Foster et al. (2017a)	shallow infaunal deposit-feeder
Austrotindaria sp.	Bivalve	Andraz Horizon	Foster et al. (2017b)	shallow to moderately deep infaunal suspension-feeder
Austrotindaria svalbardensis FOSTER, DANISE & TWITCHETT, 2017	Bivalve	Deltadalen Mb.	Foster et al. (2017a)	shallow infaunal deposit-feeder
Austrotindaria? cf. antiqua FOSTER, DANISE & TWITCHETT, 2017	Bivalve	Daye Fm.	Foster et al. (2019)	shallow to moderately deep infaunal suspension-feeder
Austrotindaria? cf. canalensis (CATULLO, 1848)	Bivalve	Daye Fm.	Foster et al. (2019)	shallow to moderately deep infaunal suspension-feeder
Austrotindaria? cf. svalbardensis FOSTER, DANISE & TWITCHETT, 2017	Bivalve	Daye Fm.	Foster et al. (2019)	shallow infaunal deposit-feeder
Avichlamys csopakensis (FRECH, 1905)	Bivalve	Csopak Marl	Broglio Loriga et al. (1990), Budai (2008)	epibyssate suspension-feeder
Avichlamys sp.	Bivalve	Campil Mb.	Broglio Loriga et al. (1990)	epibyssate suspension-feeder
Avichlamys tellinii (TOMMASI, 1895)	Bivalve	Cencenighe Mb.	Neri & Posenato (1985), Foster et al. (2017b)	epibyssate suspension-feeder
Avichlamys voelseckhofensis WITTENBURG, 1908	Bivalve	Val Badia Mb.	Hofmann et al. (2015)	epibyssate suspension-feeder
Avichlamys? cf. nicolensis (OGILVIE GORDON, 1927)	Bivalve	Tubiphytes-Lmst. Mb.	Friesenbichler et al. (2019a)	epibyssate suspension-feeder
Avicula bronni VON ALBERTI, 1830	Bivalve	Jena Fm., "Middle Muschelkalk", Trochitenkalk Fm., Meissner Fm., Erfurt Fm.	Schmidt (1928, 1938)	epibyssate suspension-feeder
Avicula cf. arcoidea BITTNER, 1895	Bivalve	Latemar Lmst.	Wilckens (1909)	epibyssate suspension-feeder
Avicula crispata GOLDFUSS, 1863	Bivalve	Meissner Fm.	Schmidt (1928, 1938)	ecology unsure
Avicula decipiens SALOMON, 1895	Bivalve	Marmolada Lmst.	Salomon (1895)	epibyssate suspension-feeder
Avicula mediocalcis HOHENSTEIN, 1913	Bivalve	"Middle Muschelkalk"	Schmidt (1928, 1938)	epibyssate suspension-feeder
Avicula pulchella VON ALBERTI, 1864	Bivalve	Trochitenkalk Fm., Meissner Fm.	Schmidt (1928, 1938)	ecology unsure
Avicularca sp.	Bivalve	Latemar Lmst.	Friesenbichler et al. (unpublished data)	epibyssate suspension-feeder
Aviculopecten triadicus SALOMON, 1895	Bivalve	Marmolada Lmst.	Salomon (1895)	epibyssate suspension-feeder
Aviculopectinidae indet.	Bivalve	Tesero Oolithe	Broglio Loriga et al. (1990)	epibyssate suspension-feeder
Aviculopectinoidea n. gen. et n. sp. indet.	Bivalve	Tubiphytes-Lmst. Mb.	Friesenbichler et al. (2019a)	epibyssate suspension-feeder
Badiotella (Lima?) semiradiata WILCKENS, 1909	Bivalve	Latemar Lmst.	Wilckens (1909)	epibyssate suspension-feeder
Badiotella broilii WILCKENS, 1909	Bivalve	Latemar Lmst.	Wilckens (1909)	epibyssate suspension-feeder
Bakevellia (Bakevellia) binneyi (BROWN, 1841)	Bivalve	Felsöörs Fm.	Vörös (2003)	endobyssate suspension-feeder
Bakevellia albertii (MÜNSTER, 1838)	Bivalve	Val Badia Mb., Cencenighe Mb.	Hofmann et al. (2015), Neri & Posenato (1985), Broglio Loriga et al. (1990), Schmidt (1928, 1938)	endobyssate suspension-feeder
Bakevellia castelli (WITTENBURG, 1908)	Bivalve	Cencenighe Mb.	Neri & Posenato (1985)	endobyssate suspension-feeder
Bakevellia ceratophaga (VON SCHLOTHEIM, 1816)	Bivalve	Luolou Fm., Daye Fm.	Hautmann et al. (2015), Foster et al. (2019)	endobyssate suspension-feeder
Bakevellia cf. albertii (MÜNSTER, 1838)	Bivalve	Campil Mb., San Lucano Mb.	Foster et al. (2017b)	endobyssate suspension-feeder
Bakevellia cf. costata (VON SCHLOTHEIM, 1820)	Bivalve	Cencenighe Mb.	Neri & Posenato (1985)	endobyssate suspension-feeder
Bakevellia cf. exporrecta (LEPSIUS, 1878)	Bivalve	Sinbad Fm.	Hofmann et al. (2014)	endobyssate suspension-feeder
Bakevellia cf. incurvata (LEPSIUS, 1878)	Bivalve	Szin Marl Fm.	Foster et al. (2015)	endobyssate suspension-feeder
Bakevellia cf. ladina (LEONARDI, 1932)	Bivalve	Cencenighe Mb.	Neri & Posenato (1985)	endobyssate suspension-feeder
Bakevellia costata (VON SCHLOTHEIM, 1820)	Bivalve	Virgin Fm., Röt Fm., Jena Fm., "Middle Muschelkalk", Trochitenkalk Fm., Meissner Fm.	Schmidt (1928, 1938), Busse (1972), Ockert (1993), Hagdorn & Ockert (1993), Urlichs (1992), Hautmann et al. (2013), Hofmann et al. (2013b)	endobyssate suspension-feeder
Bakevellia exporrecta (LEPSIUS, 1878)	Bivalve	Campil Mb., Val Badia Mb., Cencenighe Mb., Virgin Fm., Daye Fm.	Hofmann et al. (2013b, 2015), Foster et al. (2019)	endobyssate suspension-feeder
Bakevellia goldfussi (VON STROMBECK, 1849)	Bivalve	Jena Fm., "Middle Muschelkalk", Trochitenkalk Fm., Meissner Fm., Erfurt Fm.	Schmidt (1928, 1938), Urlichs (1992), Busse (1972)	endobyssate suspension-feeder
Bakevellia gr. exporrecta (LEPSIUS, 1878)	Bivalve	Csopak Marl	Broglio Loriga et al. (1990)	endobyssate suspension-feeder
Bakevellia gr. exporrecta (LEPSIUS, 1878)	Bivalve	San Lucano Mb.	Neri & Posenato (1985)	endobyssate suspension-feeder
Bakevellia pannonica (BITTNER, 1901)	Bivalve	Campil Mb., Hidegkut Fm.	Bittner (1901), Broglio Loriga et al. (1990)	endobyssate suspension-feeder
Bakevellia sp.	Bivalve	Csopak Marl	Broglio Loriga et al. (1990)	endobyssate suspension-feeder
Bakevellia sp.	Bivalve	Felsöörs Fm.	Vörös (2003)	endobyssate suspension-feeder
Bakevellia sp.	Bivalve	Viganvar, Lapis Lmst., Zuhanya Lmst.	Foster & Sebe (2017)	endobyssate suspension-feeder
Bakevellia sp.	Bivalve	Tesero Oolithe, Seis Mb., Gastropod Oolithe, Val Badia Mb.	Broglio Loriga et al. (1990)	endobyssate suspension-feeder
Bakevellia subcostata (GOLDFUSS, 1838)	Bivalve	Jena Fm., Trochitenkalk Fm., Meissner Fm., Erfurt Fm.	Urlichs (1992), Schmidt (1928, 1938)	endobyssate suspension-feeder
Bakevellia? sp.	Bivalve	Zhitkov Fm.	Shigeta et al. (2009)	endobyssate suspension-feeder
Bakevelliidae indet.	Bivalve	Daye Fm.	Foster et al. (2019)	endobyssate suspension-feeder
Bakevelliidae indet.	Bivalve	Tubiphytes-Lmst. Mb.	Friesenbichler et al. (2019a)	free-lying suspension-feeder
Balanocrinus n. sp.	Crinoid	Leidapo Mb.	Stiller (2001)	erected epifaunal suspension-feeder
Bangtoupocrinus kokeni STILLER, 2000	Crinoid	Leidapo Mb.	Stiller (2001)	erected epifaunal suspension-feeder
Bellerophon vaceki (BITTER, 1899)	Gastropod	Tesero Oolithe, Seis Mb., Daye Fm.	Broglio Loriga et al. (1886, 1990), Foster et al. (2017b, 2019)	epifaunal herbivore and/or detritus-feeder
Bellerophontid indet.	Gastropod	Mazzin Mb.	Hofmann et al. (2015)	epifaunal herbivore and/or detritus-feeder
Bivalve indet.	Bivalve	Zuhanya Lmst.	Foster & Sebe (2017)	ecology unsure
Bositra wengensis (WISSMANN, 1841)	Bivalve	Tubiphytes-Lmst. Mb., Felsöörs Fm., Leidapo Mb.	Komatsu et al. (2004), Friesenbichler et al. (2019a), Vörös (2003)	epibyssate suspension-feeder
Botulopsis cassiana (BITTNER, 1895)	Bivalve	Latemar Lmst.	Friesenbichler et al. (unpublished data)	epibyssate suspension-feeder
Botulopsis cf. cassiana (BITTNER, 1895)	Bivalve	Leidapo Mb.	Stiller (2001)	epibyssate suspension-feeder
Bourguetia sulcata KOKEN, 1898	Gastropod	Trochitenkalk Fm., Meissner Fm.	Schmidt (1928, 1938)	epifaunal herbivore and/or detritus-feeder
Boutillieria sinbadensis BATTEN & STOKES, 1986	Gastropod	Sinbad Fm.	Batten & Stokes (1986)	epifaunal herbivore and/or detritus-feeder
Brachiopod indet.	Brachiopod	Luolou Fm.	Hautmann et al. (2015)	pedunculate suspension-feeder
Brachiopod indet.	Brachiopod	Leidapo Mb.	Stiller (2001)	pedunculate suspension-feeder
Brochidium cf. aries (LAUBE, 1868)	Gastropod	Latemar Lmst.	Häberle (1908)	epifaunal herbivore and/or detritus-feeder
Brochidium salomoni HÄBERLE, 1908	Gastropod	Latemar Lmst.	Häberle (1908)	epifaunal herbivore and/or detritus-feeder
Bryozoa indet. A	Bryozoan	Leidapo Mb.	Stiller (2001)	cemented epifaunal suspension-feeder
Bryozoa indet. B	Bryozoan	Leidapo Mb.	Stiller (2001)	cemented epifaunal suspension-feeder
Calliosoma? cucullus BÖHM, 1895	Gastropod	Marmolada Lmst.	Böhm (1895)	epifaunal herbivore and/or detritus-feeder
Calliosoma? semipunctatus (BRAUN, 1891)	Gastropod	Marmolada Lmst.	Böhm (1895)	epifaunal herbivore and/or detritus-feeder
Calliosoma? sp.	Gastropod	Marmolada Lmst.	Böhm (1895)	epifaunal herbivore and/or detritus-feeder
Capulus apollinus BÖHM, 1895	Gastropod	Marmolada Lmst.	Böhm (1895)	epifaunal herbivore and/or detritus-feeder
Capulus philippi HÄBERLE, 1908	Gastropod	Latemar Lmst.	Häberle (1908)	epifaunal herbivore and/or detritus-feeder
Cardinia n. sp.	Bivalve	Leidapo Mb.	Stiller (2001)	shallow to moderately deep infaunal suspension-feeder
Cardinia? sp.	Bivalve	Latemar Lmst.	Friesenbichler et al. (unpublished data)	shallow to moderately deep infaunal suspension-feeder
Caridae indet.	Crustacean	Lower Shale Unit	Brayard et al. (2017)	ecology unsure
Cassianella bipartita (VON KLIPSTEIN, 1845)	Bivalve	Schlernplateau beds	Friesenbichler et al. (2019b)	free-lying suspension-feeder
Cassianella compressa WILCKENS, 1909	Bivalve	Latemar Lmst.	Wilckens (1909)	free-lying suspension-feeder
Cassianella decussata (MÜNSTER, 1841)	Bivalve	Schlernplateau beds	Wöhrmann & Koken (1892), Friesenbichler et al. (2019b)	free-lying suspension-feeder
Cassianella ecki sulcata CHEN in YIN, 1974	Bivalve	Leidapo Mb.	Stiller (2001), Komatsu et al. (2004)	endobyssate suspension-feeder
Cassianella johannisboehmi SALOMON, 1895	Bivalve	Marmolada Lmst.	Salomon (1895)	free-lying suspension-feeder
Cassianella planidorsata MÜNSTER, 1841	Bivalve	Schlernplateau beds	Friesenbichler et al. (2019b)	free-lying suspension-feeder
Cassianella praecursor FRECH, 1904	Bivalve	Felsöörs Fm.	Vörös (2003)	free-lying suspension-feeder
Cassianella qingyanensis CHEN, MA & ZHANG, 1974	Bivalve	Leidapo Mb.	Stiller (2001), Komatsu et al. (2004)	endobyssate suspension-feeder
Cassianella rosenbuschi PHILIPP, 1904	Bivalve	Latemar Lmst.	Wilckens (1909)	free-lying suspension-feeder
Cassianella simplex CHEN, 1976	Bivalve	Leidapo Mb.	Stiller (2001), Komatsu et al. (2004)	endobyssate suspension-feeder
Cassianella sp.	Bivalve	Leidapo Mb.	Stiller (2001)	endobyssate suspension-feeder
Cassianella sp.	Bivalve	Felsöörs Fm.	Vörös (2003)	free-lying suspension-feeder
Cassianella subcislonensis XU in XU & CHEN, 1943	Bivalve	Leidapo Mb.	Stiller (2001), Komatsu et al. (2004)	endobyssate suspension-feeder
Caucasorhynchia cf. altaplecta (BÖCKH, 1872)	Brachiopod	Felsöörs Fm.	Vörös (2003)	pedunculate suspension-feeder
Cerithiimorpha n. gen. et n. sp. indet.	Gastropod	Leidapo Mb.	Stiller (2001)	epifaunal herbivore and/or detritus-feeder
Cerithium cf. bolinum MÜNSTER, 1841	Gastropod	Schlernplateau beds	Wöhrmann & Koken (1892)	epifaunal herbivore and/or detritus-feeder
Cerithium subquadrangulatum D'ORBIGNY	Gastropod	Schlernplateau beds	Wöhrmann & Koken (1892)	epifaunal herbivore and/or detritus-feeder
cf. Gervillaria sp.	Bivalve	Daye Fm.	Foster et al. (2019)	endobyssate suspension-feeder
cf. Holocrinus sp.	Crinoid	Daye Fm.	Foster et al. (2019)	erected epifaunal suspension-feeder
cf. Leptochondria albertii (GOLDFUSS, 1838)	Bivalve	Lapis Lmst.	Foster & Sebe (2017)	epibyssate suspension-feeder
cf. Lyriomyophoria elegans (DUNKER, 1849)	Bivalve	Zuhanya Lmst.	Foster & Sebe (2017)	shallow to moderately deep infaunal suspension-feeder
cf. Mytilus (Septifer) praeacutus (VON KLIPSTEIN, 1843)	Bivalve	Latemar Lmst.	Friesenbichler et al. (unpublished data)	epibyssate suspension-feeder
cf. Natiria sp.	Gastropod	Viganvar	Foster & Sebe (2017)	epifaunal herbivore and/or detritus-feeder
cf. Plagioglypta sp.	Scaphopod	Zuhanya Lmst.	Foster & Sebe (2017)	shallow infaunal deposit-feeder
cf. Unionites canalensis (CATULLO, 1848)	Bivalve	Bodvaszilas Sandst. Fm., Szin Marl Fm.	Foster et al. (2015)	shallow to moderately deep infaunal suspension-feeder
cf. Unionites fassaensis (WISSMANN in MÜNSTER, 1841)	Bivalve	Bodvaszilas Sandst. Fm., Szin Marl Fm.	Foster et al. (2015)	shallow to moderately deep infaunal suspension-feeder
cf. Unionites cf. muensteri (WISSMANN in MÜNSTER, 1841)	Bivalve	Daye Fm.	Foster et al. (2019)	shallow to moderately deep infaunal suspension-feeder
cf. Unionites sp.	Bivalve	Bodvaszilas Sandst. Fm.	Foster et al. (2015)	shallow to moderately deep infaunal suspension-feeder
cf. Unionites subrectus (BITTNER, 1901)	Bivalve	Lapis Lmst.	Foster & Sebe (2017)	shallow to moderately deep infaunal suspension-feeder
Chartronella maedai KAIM in SHIGETA ET AL., 2009	Gastropod	Zhitkov Fm.	Shigeta et al. (2009)	epifaunal herbivore and/or detritus-feeder
Chartronella sp.	Gastropod	Virgin Fm.	McGowan et al. (2009)	epifaunal herbivore and/or detritus-feeder
Chartronella unicostata BATTEN & STOKES, 1986	Gastropod	Sinbad Fm.	Batten & Stokes (1986)	epifaunal herbivore and/or detritus-feeder
Chartronella? pagina BATTEN & STOKES, 1986	Gastropod	Sinbad Fm.	Batten & Stokes (1986)	epifaunal herbivore and/or detritus-feeder
Chartronella? sp.	Gastropod	Sinbad Fm.	Hofmann et al. (2014)	epifaunal herbivore and/or detritus-feeder
Cheilotoma avisii BÖHM, 1895	Gastropod	Marmolada Lmst.	Böhm (1895)	epifaunal herbivore and/or detritus-feeder
Cheilotomona pentagonum YU, PAN & WANG, 1974	Gastropod	Leidapo Mb.	Stiller (2001)	epifaunal herbivore and/or detritus-feeder
Chemnitzia blezingeri KOKEN, 1898	Gastropod	Trochitenkalk Fm., Meissner Fm.	Schmidt (1928, 1938)	epifaunal herbivore and/or detritus-feeder
Chemnitzia cf. longiscata KOKEN, 1892	Gastropod	Schlernplateau beds	Friesenbichler et al. (2019b)	epifaunal herbivore and/or detritus-feeder
Chemnitzia hehli PHILLIPS, 1898	Gastropod	Meissner Fm.	Schmidt (1928, 1938)	epifaunal herbivore and/or detritus-feeder
Chemnitzia hehli VON ZIETEN, 1830	Gastropod	Trochitenkalk Fm., Meissner Fm.	Schmidt (1928, 1938)	epifaunal herbivore and/or detritus-feeder
Chemnitzia longiscata KOKEN, 1892	Gastropod	Schlernplateau beds	Wöhrmann & Koken (1892), Friesenbichler et al. (2019b)	epifaunal herbivore and/or detritus-feeder
Chemnitzia oblita GIEBEL, 1856	Gastropod	Jena Fm., Trochitenkalk Fm., Meissner Fm.	Wagner (1897)	epifaunal herbivore and/or detritus-feeder
Chemnitzia solida KOKEN, 1892	Gastropod	Schlernplateau beds	Wöhrmann & Koken (1892), Blaschke (1905), Friesenbichler et al. (2019b)	epifaunal herbivore and/or detritus-feeder
Chemnitzia turris ECK	Gastropod	Röt Fm., Jena Fm.	Wagner (1897)	epifaunal herbivore and/or detritus-feeder
Chilocyclus acutissimus HÄBERLE, 1908	Gastropod	Latemar Lmst.	Häberle (1908)	epifaunal herbivore and/or detritus-feeder
Chlamys (Praechlamys) prima FRIESENBICHLER, HAUTMANN, GRĂDINARU & BUCHER, 2019	Bivalve	Tubiphytes-Lmst. Mb.	Friesenbichler et al. (2019a)	epibyssate suspension-feeder
Cidaris alata AGASSIZ, 1839	Echinoid	Schlernplateau beds	Wöhrmann & Koken (1892)	epifaunal herbivore and/or detritus-feeder
Cidaris brauni DESOR, 1858	Echinoid	Schlernplateau beds	Friesenbichler et al. (2019b)	epifaunal herbivore and/or detritus-feeder
Cidaris cf. dorsata BRAUN, 1841	Echinoid	Schlernplateau beds	Wöhrmann & Koken (1892)	epifaunal herbivore and/or detritus-feeder
Cidaris grandaeva GOLDFUSS, 1974	Echinoid	Jena Fm., "Middle Muschelkalk", Trochitenkalk Fm., Meissner Fm.	Schmidt (1928, 1938), Hagdorn & Ockert (1993), Ockert (1993)	epifaunal herbivore and/or detritus-feeder
Cidaris koenigi FRENTZEN, 1920	Echinoid	Trochitenkalk Fm., Meissner Fm.	Schmidt (1928, 1938)	epifaunal herbivore and/or detritus-feeder
Cidaris microperlata FRENTZEN, 1920	Echinoid	Trochitenkalk Fm., Meissner Fm.	Schmidt (1928, 1938)	epifaunal herbivore and/or detritus-feeder
Cidaris n. sp.	Echinoid	Marmolada Lmst.	Salomon (1895)	epifaunal herbivore and/or detritus-feeder
Cidaris roemeri WISSMANN, 1841	Echinoid	Schlernplateau beds	Wöhrmann & Koken (1892)	epifaunal herbivore and/or detritus-feeder
Cidaris sp.	Echinoid	Marmolada Lmst.	Salomon (1895)	epifaunal herbivore and/or detritus-feeder
Cidaris transversa VON MEYER, 1847	Echinoid	Trochitenkalk Fm., Meissner Fm.	Schmidt (1928, 1938)	epifaunal herbivore and/or detritus-feeder
Cidaris triserrata LAUBE, 1865	Echinoid	Marmolada Lmst.	Salomon (1895)	epifaunal herbivore and/or detritus-feeder
Claraia aurita VON HAUER, 1850	Bivalve	Mazzin Mb., Bodvaszilas Sandst. Fm., Dinwoody Fm., Seis Mb.	Foster et al. (2015), Hofmann et al. (2013b, 2015), Broglio Loriga et al. (1990)	epibyssate suspension-feeder
Claraia cf. stachei BITTNER, 1901	Bivalve	Dinwoody Fm.	Hofmann et al. (2013a)	epibyssate suspension-feeder
Claraia cf. wangi-griesbachi	Bivalve	Bodvaszilas Sandst. Fm.	Foster et al. (2015)	epibyssate suspension-feeder
Claraia clarai (EMMRICH, 1944)	Bivalve	Mazzin Mb., Bodvaszilas Sandst. Fm., Seis Mb.	Foster et al. (2015, 2017), Broglio Loriga et al. (1990), Hofmann et al. (2015)	epibyssate suspension-feeder
Claraia dalpiazi LEONARDI	Bivalve	Seis Mb.	Broglio Loriga et al. (1990)	epibyssate suspension-feeder
Claraia liuqiaoensis HE, FENG, WELDON, GU, MENG, ZHANG & WU, 2007	Bivalve	Luolou Fm., Daye Fm.	Hautmann et al. (2015), Foster et al. (2019)	epibyssate suspension-feeder
Claraia mulleri NEWELL & KUMMEL, 1942	Bivalve	Dinwoody Fm.	Hofmann et al. (2013a)	epibyssate suspension-feeder
Claraia sp.	Bivalve	Bodvaszilas Sandst. Fm.	Foster et al. (2015)	epibyssate suspension-feeder
Claraia stachei BITTNER, 1901	Bivalve	Lazurnaya Bay Fm., Seis Mb.	Shigeta et al. (2009), Foster et al. (2017b)	epibyssate suspension-feeder
Claraia wangi-griesbachi	Bivalve	Mazzin Mb.	Broglio-Loriga et al. (1990), Foster et al. (2017b)	epibyssate suspension-feeder
Clathrobaculus? n. sp.	Gastropod	Leidapo Mb.	Stiller (2001)	epifaunal herbivore and/or detritus-feeder
Clytiopsis argentoratensis BILL, 1914	Crustacean	Röt Fm.	Schmidt (1928, 1938)	epifaunal carnivore
Clytiopsis elegans BILL, 1914	Crustacean	Röt Fm.	Schmidt (1928, 1938)	epifaunal carnivore
Coelocentrus infracarinatus (KITTL, 1894)	Gastropod	Marmolada Lmst.	Böhm (1895)	epifaunal herbivore and/or detritus-feeder
Coelocentrus infrastriatus (VON STROMBECK, 1850)	Gastropod	Jena Fm.	Schmidt (1928, 1938)	epifaunal herbivore and/or detritus-feeder
Coelocentrus kokeni PICARD, 1903	Gastropod	Jena Fm.	Schmidt (1928, 1938)	epifaunal herbivore and/or detritus-feeder
Coelochrysalis ammoni BÖHM, 1895	Gastropod	Marmolada Lmst., Latemar Lmst.	Böhm (1895), Friesenbichler et al. (unpublished data)	epifaunal herbivore and/or detritus-feeder
Coelochrysalis cf. megaspira (STOPPANI, 1857)	Gastropod	Marmolada Lmst.	Böhm (1895)	epifaunal herbivore and/or detritus-feeder
Coelochrysalis excavata KITTL, 1894	Gastropod	Marmolada Lmst.	Böhm (1895)	epifaunal herbivore and/or detritus-feeder
Coelochrysalis germanica (HOHENSTEIN, 1913)	Gastropod	"Middle Muschelkalk"	Schmidt (1928, 1938)	epifaunal herbivore and/or detritus-feeder
Coelochrysalis lepsiusi BÖHM, 1895	Gastropod	Marmolada Lmst.	Böhm (1895)	epifaunal herbivore and/or detritus-feeder
Coelochrysalis tenuicarinata KITTL, 1894	Gastropod	Marmolada Lmst., Latemar Lmst.	Böhm (1895), Friesenbichler et al. (unpublished data)	epifaunal herbivore and/or detritus-feeder
Coelochrysalis? torpediniformis BÖHM, 1895	Gastropod	Marmolada Lmst., Latemar Lmst.	Böhm (1895), Friesenbichler et al. (unpublished data)	epifaunal herbivore and/or detritus-feeder
Coelopis (Coelopis) n. sp.	Bivalve	Leidapo Mb.	Stiller (2001)	shallow to moderately deep infaunal suspension-feeder
Coelostylina ahlburgi (ASSMANN, 1924)	Gastropod	Leidapo Mb.	Stiller (2001), Yin & Yochelson (1983c)	epifaunal herbivore and/or detritus-feeder
Coelostylina brevissima KITTL, 1894	Gastropod	Marmolada Lmst.	Böhm (1895)	epifaunal herbivore and/or detritus-feeder
Coelostylina camerata BÖHM, 1895	Gastropod	Marmolada Lmst.	Böhm (1895)	epifaunal herbivore and/or detritus-feeder
Coelostylina cf. angulifera (WHITE, 1874)	Gastropod	Sinbad Fm.	Batten & Stokes (1986)	epifaunal herbivore and/or detritus-feeder
Coelostylina cf. elegans BROILI, 1907	Gastropod	Leidapo Mb.	Stiller (2001)	epifaunal herbivore and/or detritus-feeder
Coelostylina cf. gradata (HÖRNES, 1856)	Gastropod	Marmolada Lmst.	Böhm (1895)	epifaunal herbivore and/or detritus-feeder
Coelostylina clava BÖHM, 1895	Gastropod	Marmolada Lmst.	Böhm (1895)	epifaunal herbivore and/or detritus-feeder
Coelostylina costata BATTEN & STOKES, 1986	Gastropod	Sinbad Fm.	Batten & Stokes (1986)	epifaunal herbivore and/or detritus-feeder
Coelostylina densestriata BÖHM, 1895	Gastropod	Marmolada Lmst.	Böhm (1895)	epifaunal herbivore and/or detritus-feeder
Coelostylina exornata KITTL, 1894	Gastropod	Marmolada Lmst.	Böhm (1895)	epifaunal herbivore and/or detritus-feeder
Coelostylina fedaiana KITTL, 1894	Gastropod	Latemar Lmst., Marmolada Lmst.	Böhm (1895), Friesenbichler et al. (unpublished data)	epifaunal herbivore and/or detritus-feeder
Coelostylina heeri KITTL, 1894	Gastropod	Marmolada Lmst.	Böhm (1895)	epifaunal herbivore and/or detritus-feeder
Coelostylina hoernesi BÖHM, 1895	Gastropod	Marmolada Lmst.	Böhm (1895)	epifaunal herbivore and/or detritus-feeder
Coelostylina ignobilis BÖHM, 1895	Gastropod	Marmolada Lmst.	Böhm (1895)	epifaunal herbivore and/or detritus-feeder
Coelostylina lineata BÖHM, 1895	Gastropod	Marmolada Lmst.	Böhm (1895)	epifaunal herbivore and/or detritus-feeder
Coelostylina liscaviensis (GIEBEL, 1856)	Gastropod	Leidapo Mb., Latemar Lmst., Jena Fm.	Stiller (2001), Yin & Yochelson (1983c), Friesenbichler et al. (unpublished data), Schmidt (1928, 1938)	epifaunal herbivore and/or detritus-feeder
Coelostylina micropunctata NÜTZEL, KAIM & GRĂDINARU, 2018	Gastropod	Tubiphytes-Lmst. Mb.	Nützel et al. (2018)	epifaunal herbivore and/or detritus-feeder
Coelostylina pachygaster KITTL, 1894	Gastropod	Marmolada Lmst.	Böhm (1895)	epifaunal herbivore and/or detritus-feeder
Coelostylina reyeri KITTL, 1894	Gastropod	Latemar Lmst., Marmolada Lmst.	Böhm (1895), Friesenbichler et al. (unpublished data)	epifaunal herbivore and/or detritus-feeder
Coelostylina scissa BÖHM, 1895	Gastropod	Marmolada Lmst.	Böhm (1895)	epifaunal herbivore and/or detritus-feeder
Coelostylina solida BÖHM, 1895	Gastropod	Marmolada Lmst.	Böhm (1895)	epifaunal herbivore and/or detritus-feeder
Coelostylina sp.	Gastropod	Schlernplateau beds	Friesenbichler et al. (2019b)	epifaunal herbivore and/or detritus-feeder
Coelostylina sp.	Gastropod	Lazurnaya Bay Fm.	Shigeta et al. (2009)	epifaunal herbivore and/or detritus-feeder
Coelostylina sp.	Gastropod	Dinwoody Fm.	Hofmann et al. (2013a)	epifaunal herbivore and/or detritus-feeder
Coelostylina sp. A	Gastropod	Sinbad Fm.	Batten & Stokes (1986)	epifaunal herbivore and/or detritus-feeder
Coelostylina sp. B	Gastropod	Sinbad Fm.	Batten & Stokes (1986)	epifaunal herbivore and/or detritus-feeder
Coelostylina undata BÖHM, 1895	Gastropod	Marmolada Lmst.	Böhm (1895)	epifaunal herbivore and/or detritus-feeder
Coelostylina virginensis BATTEN & STOKES, 1986	Gastropod	Sinbad Fm.	Batten & Stokes (1986)	epifaunal herbivore and/or detritus-feeder
Coelostylina werfensis WITTENBURG 1908	Gastropod	Mazzin Mb., Seis Mb., Gastropod Oolithe, Hidegkut Fm., San Lucano Mb., Csopak Marl	Broglio Lorigo et al. (1986, 1990), Neri & Posenato (1985), Hofmann et al. (2014), Foster et al. (2017b)	epifaunal herbivore and/or detritus-feeder
Coelostylinidae n. gen. A n. sp. A	Gastropod	Leidapo Mb.	Stiller (2001)	epifaunal herbivore and/or detritus-feeder
Coelostylinidae n. gen. A n. sp. B	Gastropod	Leidapo Mb.	Stiller (2001)	epifaunal herbivore and/or detritus-feeder
Coenothyris cf. cuccensis BITTNER, 1890	Brachiopod	Felsöörs Fm.	Vörös (2003)	pedunculate suspension-feeder
Coenothyris cf. kraffti BITTNER, 1890	Brachiopod	Felsöörs Fm.	Vörös (2003)	pedunculate suspension-feeder
Coenothyris cf. vulgaris (VON SCHLOTHEIM, 1820)	Brachiopod	Erfurt Fm.	Urlichs (1992)	pedunculate suspension-feeder
Coenothyris cycloides (ZENKER, 1836)	Brachiopod	Meissner Fm., Erfurt Fm.	Schmidt (1928, 1938), Hagdorn & Mundlos (1982)	pedunculate suspension-feeder
Coenothyris vulgaris (VON SCHLOTHEIM, 1820)	Brachiopod	Zuhanya Lmst., Felsöörs Fm., Jena Fm., "Middle Muschelkalk", Meissner Fm., Trochitenkalk Fm.	Schmidt (1928, 1938), Busse (1972), Hagdorn & Mundlos (1982), Hagdorn & Ockert (1993), Foster & Sebe (2017), Szabó et al. (1979), Vörös (2003), Ockert (1993)	pedunculate suspension-feeder
Coenothyris? aff. kraffti BITTNER, 1902	Brachiopod	Felsöörs Fm.	Vörös (2003)	pedunculate suspension-feeder
Collonia cincta (MÜNSTER, 1841)	Gastropod	Latemar Lmst.	Häberle (1908)	epifaunal herbivore and/or detritus-feeder
Colubrella hettneri HÄBERLE, 1908	Gastropod	Latemar Lmst.	Häberle (1908)	epifaunal herbivore and/or detritus-feeder
Colubrella kokeni HÄBERLE, 1908	Gastropod	Latemar Lmst.	Häberle (1908)	epifaunal herbivore and/or detritus-feeder
Confusionella loczyi BITTNER, 1901	Bivalve	Campil Mb., Hidegkut Fm., Sinbad Fm.	Hofmann et al. (2014), Bittner (1901), Broglio Loriga et al. (1990)	epibyssate suspension-feeder
Coronaria cf. subcompressa KITTL, 1894	Gastropod	Marmolada Lmst.	Böhm (1895)	epifaunal herbivore and/or detritus-feeder
Coronaria rugosa BÖHM, 1985	Gastropod	Marmolada Lmst.	Böhm (1895)	epifaunal herbivore and/or detritus-feeder
Coronaria subcerithiformis (KITTL, 1894)	Gastropod	Marmolada Lmst.	Böhm (1895)	epifaunal herbivore and/or detritus-feeder
Cossmannina alfischeri FOSTER, LEHRMANN, HIRTZ, WHITE, YU, LI & MARTINDALE, 2019	Gastropod	Daye Fm.	Foster et al.(2019)	epifaunal herbivore and/or detritus-feeder
Costatoria costata (ZENKER, 1933)	Bivalve	Szin Marl Fm., Cencenighe Mb., San Lucano Mb., Csopak Marl, Röt Fm.	Foster et al. (2015, 2017b), Schmid (1938), Broglio Loriga et al. (1990), Budai (2008), Neri & Posenato (1985)	shallow to moderately deep infaunal suspension-feeder
Costatoria inaequicostata (VON KLIPSTEIN, 1843)	Bivalve	Leidapo Mb.	Komatsu et al. (2004)	shallow to moderately deep infaunal suspension-feeder
Costatoria proharpa multiformis CHEN, 1976	Bivalve	Leidapo Mb.	Stiller (2001), Komatsu et al. (2004)	shallow to moderately deep infaunal suspension-feeder
Costatoria sp.	Bivalve	Viganvar, Lapis Lmst.	Foster & Sebe (2017)	shallow to moderately deep infaunal suspension-feeder
Costatoria subrotunda (BITTNER, 1901)	Bivalve	Campil Mb., Val Badia Mb.	Broglio Loriga et al. (1990), Hofmann et al. (2015)	shallow to moderately deep infaunal suspension-feeder
Costirhynchopsis mentzeli (BUCH, 1843)	Brachiopod	Felsöörs Fm.	Vörös (2003)	pedunculate suspension-feeder
Costirhynchopsis sinensis (YANG & XU, 1966)	Brachiopod	Leidapo Mb.	Stiller (2001)	pedunculate suspension-feeder
Costirhynchopsis sp. B	Brachiopod	Tubiphytes-Lmst. Mb.	Grădinaru & Gaetani (2019)	pedunculate suspension-feeder
Costirhynchopsis sp. C	Brachiopod	Tubiphytes-Lmst. Mb.	Grădinaru & Gaetani (2019)	pedunculate suspension-feeder
Costirhynchopsis xingyiensis (YANG & XU, 1966)	Brachiopod	Leidapo Mb.	Stiller (2001)	pedunculate suspension-feeder
Costispiriferina manca (BITTNER, 1890)	Brachiopod	Felsöörs Fm.	Vörös (2003)	pedunculate suspension-feeder
Crinoid indet.	Crinoid	Csopak Marl	Broglio Loriga et al. (1990)	erected epifaunal suspension-feeder
Crittendenia? sp.	Bivalve	Sinbad Fm.	Hofmann et al. (2014)	epibyssate suspension-feeder
Cruratula cf. forficula ROTHPLETZ, 1886	Brachiopod	Latemar Lmst.	Wilckens (1909)	pedunculate suspension-feeder
Crurirhynchia subfissicostata YANG & XU, 1966	Brachiopod	Leidapo Mb.	Stiller (2001)	pedunculate suspension-feeder
Crurithyris extima (GRANT, 1970)	Brachiopod	Tesero Oolithe	Broglio Loriga et al. (1986)	pedunculate suspension-feeder
Cryptonerita conoidea BÖHM, 1895	Gastropod	Latemar Lmst., Marmolada Lmst.	Häberle (1908), Böhm (1895)	epifaunal herbivore and/or detritus-feeder
Cryptonerita elliptica KITTL, 1894	Gastropod	Jena Fm., Leidapo Mb., "Middle Muschelkalk", Marmolada Lmst.	Böhm (1895), Schmidt (1928, 1938), Yin & Yochelson (1983c)	epifaunal herbivore and/or detritus-feeder
Ctenodonta rugosa ASSMANN, 1937	Bivalve	Jena Fm.	Schmidt (1928, 1938)	shallow to moderately deep infaunal suspension-feeder
Cultriopsis angusta (GOLDFUSS, 1838)	Bivalve	Leidapo Mb.	Komatsu et al. (2004)	endobyssate suspension-feeder
Cultriopsis sp.	Bivalve	Tubiphytes-Lmst. Mb.	Friesenbichler et al. (2019a)	endobyssate suspension-feeder
Curionia curionii meriani (STOPPANI, 1857)	Bivalve	Leidapo Mb.	Stiller (2001)	endobyssate suspension-feeder
Cyclonema circumnodosum (KITTL, 1894)	Gastropod	Marmolada Lmst.	Böhm (1895)	epifaunal herbivore and/or detritus-feeder
Cylindrobullina convexa BATTEN & STOKES, 1986	Gastropod	Sinbad Fm.	Batten & Stokes (1986)	epifaunal herbivore and/or detritus-feeder
Cypricardia escheri (GIEBEL, 1856)	Bivalve	Jena Fm.	Schmidt (1928, 1938)	shallow to moderately deep infaunal suspension-feeder
Cypricardia? suevica OPPEL & SUESS, 1856	Bivalve	Jena Fm.	Schmidt (1928, 1938)	deep infaunal suspension-feeder
Dacryomya sp.	Bivalve	Luolou Fm.	Hautmann et al. (2015)	shallow infaunal deposit-feeder
Dacromya? skorochodi (KIPARISOVA, 1938)	Bivalve	Daye Fm.	Foster et al. (2019)	shallow infaunal deposit-feeder
Dadocrinus gracilis VON MEYER	Crinoid	Felsöörs Fm., Jena Fm.	Szabó et al. (1979), Schmidt (1928, 1938)	erected epifaunal suspension-feeder
Dadocrinus kunischi WACHSMUTH & SPRINGER, 1887	Crinoid	Röt Fm., Jena Fm.	Schmidt (1928, 1938)	erected epifaunal suspension-feeder
Dadocrinus sp.	Crinoid	Viganvar, Lapis Lmst.	Foster & Sebe (2017)	erected epifaunal suspension-feeder
Daonella (Daonella) boeckhi VON MOJSISOVICS, 1874	Bivalve	Felsöörs Fm., Leidapo Mb.	Vörös (2003), Stiller (2001), Komatsu et al. (2004)	epibyssate suspension-feeder
Daonella (Daonella) luganensis RIEBER, 1969	Bivalve	Leidapo Mb.	Stiller (2001)	epibyssate suspension-feeder
Daonella (Daonella) pseudomoussoni RIEBER, 1969	Bivalve	Leidapo Mb.	Stiller (2001)	epibyssate suspension-feeder
Daonella bergeri VON MOJSISOVICS, 1874	Bivalve	Trochitenkalk Fm., Meissner Fm.	Schmidt (1928, 1938)	epibyssate suspension-feeder
Daonella cf. moussoni (MERIAN, 1853)	Bivalve	Latemar Lmst.	Wilckens (1909)	epibyssate suspension-feeder
Daonella cf. taramellii VON MOJSISOVICS, 1874	Bivalve	Felsöörs Fm.	Szabó et al. (1979)	epibyssate suspension-feeder
Daonella franconica SANDBERGER in TORNQUIST, 1903	Bivalve	Trochitenkalk Fm., Meissner Fm.	Schmidt (1928, 1938)	epibyssate suspension-feeder
Daonella hungarica VON MOJSISOVICS, 1874	Bivalve	Felsöörs Fm.	Szabó et al. (1979)	epibyssate suspension-feeder
Daonella rudis KITTL, 1912	Bivalve	Felsöörs Fm.	Szabó et al. (1979)	epibyssate suspension-feeder
Daonella sp.	Bivalve	Latemar Lmst.	Wilckens (1909)	epibyssate suspension-feeder
Daonella sturi (BENECKE, 1868)	Bivalve	Felsöörs Fm.	Szabó et al. (1979)	epibyssate suspension-feeder
Decurtella cf. illyrica (BITTNER, 1903)	Brachiopod	Felsöörs Fm.	Vörös (2003)	pedunculate suspension-feeder
Decurtella decurtata (GIRARD, 1843)	Brachiopod	Jena Fm., Felsöörs Fm., "Middle Muschelkalk"	Szabó et al. (1979), Vörös (2003), Schmidt (1928, 1938)	pedunculate suspension-feeder
Delphinulopsis binodosa (MÜNSTER, 1841)	Gastropod	Leidapo Mb.	Stiller (2001), Yin & Yochelson (1983c)	epifaunal herbivore and/or detritus-feeder
Delphinulopsis cf. laubei KITTL, 1892	Gastropod	Leidapo Mb.	Stiller (2001)	epifaunal herbivore and/or detritus-feeder
Dentalium quadrangulum MEEK, 1860	Scaphopod	Jena Fm.	Schmidt (1928, 1938)	shallow infaunal deposit-feeder
Dicellonema abrekensis (KAIM in SHIGETA ET AL., 2009)	Gastropod	Dinwoody Fm., Luolou Fm., Lazurnaya Bay Fm., Zhitkov Fm., Daye Fm.	Hofmann et al. (2013a), Hautmann et al. (2015), Shigeta et al. (2009), Foster et al. (2019)	epifaunal herbivore and/or detritus-feeder
Dicosmos declivis (KITTL, 1894)	Gastropod	Latemar Lmst., Marmolada Lmst.	Häberle (1908), Böhm (1895)	epifaunal herbivore and/or detritus-feeder
Dicosmos maculosus (VON KLIPSTEIN, 1843)	Gastropod	Latemar Lmst.	Häberle (1908)	epifaunal herbivore and/or detritus-feeder
Dicosmos mammispira KITTL, 1899	Gastropod	Latemar Lmst.	Häberle (1908)	epifaunal herbivore and/or detritus-feeder
Dicosmos? sp.	Gastropod	Marmolada Lmst.	Böhm (1895)	epifaunal herbivore and/or detritus-feeder
Dicosmos? terzadicus VON MOJSISOVICS	Gastropod	Marmolada Lmst.	Böhm (1895)	epifaunal herbivore and/or detritus-feeder
Dictyotomaria triassica (YIN & YOLCHELSON, 1983)	Gastropod	Leidapo Mb.	Stiller (2001), Yin & Yochelson (1983a)	epifaunal herbivore and/or detritus-feeder
Didymospira octoplicata PHILIPP, 1904	Brachiopod	Latemar Lmst.	Wilckens (1909)	pedunculate suspension-feeder
Didymospira pachygaster PHILIPP, 1904	Brachiopod	Latemar Lmst.	Wilckens (1909)	pedunculate suspension-feeder
Didymospira salomoni PHILIPP, 1904	Brachiopod	Latemar Lmst.	Wilckens (1909)	pedunculate suspension-feeder
Diholkorhychia sinensis (KOKEN, 1900)	Brachiopod	Leidapo Mb.	Stiller (2001)	pedunculate suspension-feeder
Dinarispira avarica (BITTNER, 1890)	Brachiopod	Felsöörs Fm.	Vörös (2003)	pedunculate suspension-feeder
Dinarispira cf. dinarica (BITTNER, 1890)	Brachiopod	Felsöörs Fm.	Vörös (2003)	pedunculate suspension-feeder
Dinarispira? sp.	Brachiopod	Tubiphytes-Lmst. Mb.	Grădinaru & Gaetani (2019)	pedunculate suspension-feeder
Discina discoides (VON SCHLOTHEIM, 1820)	Brachiopod	Röt Fm., Jena Fm., Trochitenkalk Fm., Meissner Fm.	Schmidt (1928, 1938), Hagdorn & Ockert (1993), Ockert (1993)	cemented epifaunal suspension-feeder
Discina sp.	Brachiopod	Marmolada Lmst.	Salomon (1895)	cemented epifaunal suspension-feeder
Discinidae? n. sp. indet.	Brachiopod	Lower Shale Unit	Brayard et al. (2017)	cemented epifaunal suspension-feeder
Discinisca sp.	Brachiopod	Felsöörs Fm.	Vörös (2003)	cemented epifaunal suspension-feeder
Discogonius n. sp.	Gastropod	Leidapo Mb.	Stiller (2001)	epifaunal herbivore and/or detritus-feeder
Discogonius subvenustus YIN & YOLCHELSON, 1983	Gastropod	Leidapo Mb.	Stiller (2001), Yin & Yochelson (1983c)	epifaunal herbivore and/or detritus-feeder
Discohelicidae n. gen. A n. sp. A indet.	Gastropod	Leidapo Mb.	Stiller (2001)	epifaunal herbivore and/or detritus-feeder
Donaldina? erwini FOSTER, LEHRMANN, HIRTZ, WHITE, YU, LI & MARTINDALE, 2019	Gastropod	Daye Fm.	Foster et al. (2019)	epifaunal herbivore and/or detritus-feeder
Echinoid indet.	Echinoid	Zuhanya Lmst.	Foster & Sebe (2017)	epifaunal herbivore and/or detritus-feeder
Echinoid sp.	Echinoid	Sinbad Fm.	Nützel & Schulbert (2005)	epifaunal herbivore and/or detritus-feeder
Eckicrinus radiatus (VON SCHAUROTH, 1859)	Crinoid	Lapis Lmst., Zuhanya Lmst.	Foster & Sebe (2017)	erected epifaunal suspension-feeder
Elegantarca n. sp.	Bivalve	Leidapo Mb.	Stiller (2001)	epibyssate suspension-feeder
Elegantarca subareata CHEN, MA & ZHANG, 1974	Bivalve	Leidapo Mb.	Stiller (2001), Komatsu et al. (2004)	epibyssate suspension-feeder
Elegantinia cf. venusta (CHEN, 1976)	Bivalve	Leidapo Mb.	Komatsu et al. (2004)	shallow to moderately deep infaunal suspension-feeder
Elegantinia elegans (DUNKER, 1849)	Bivalve	Tubiphytes-Lmst. Mb., Leidapo Mb., Röt Fm., Jena Fm., "Middle Muschelkalk", Trochitenkalk Fm., Meissner Fm., Erfurt Fm.	Stiller (2001), Komatsu et al. (2004), Schmidt (1928, 1938), Busse (1972), Hagdorn & Ockert (1993), Ockert (1993), Friesenbichler et al. (2019a)	shallow to moderately deep infaunal suspension-feeder
Elegantinia kulunensis LU & CHEN, 1986	Bivalve	Leidapo Mb.	Stiller (2001), Komatsu et al. (2004)	shallow to moderately deep infaunal suspension-feeder
Elegantinia n. sp.	Bivalve	Leidapo Mb.	Stiller (2001)	shallow to moderately deep infaunal suspension-feeder
Enantiostreon difforme (VON SCHLOTHEIM, 1823)	Bivalve	Röt Fm., Jena Fm., Trochitenkalk Fm., Meissner Fm., Leidapo Mb.	Schmidt (1928, 1938), Busse (1972), Hagdorn & Mundlos (1982), Hagdorn & Ockert (1993), Komatsu et al. (2004)	cemented epifaunal suspension-feeder
Enantiostreon hungaricum BITTNER, 1901	Bivalve	Trochitenkalk Fm.	Hautmann & Hagdorn (2013)	cemented epifaunal suspension-feeder
Enantiostreon scabiosum (GIEBEL, 1856)	Bivalve	Jena Fm., Trochitenkalk Fm., Meissner Fm.	Schmidt (1928, 1938)	cemented epifaunal suspension-feeder
Enantiostreon spondyloides (VON SCHLOTHEIM, 1823)	Bivalve	Jena Fm., Trochitenkalk Fm., Meissner Fm.	Schmidt (1928, 1938), Busse (1972), Hagdorn & Mundlos (1982)	cemented epifaunal suspension-feeder
Enantiostreon umbonatum GRUBER, 1932	Bivalve	Jena Fm., Trochitenkalk Fm., Meissner Fm.	Schmidt (1928, 1938)	cemented epifaunal suspension-feeder
Enantiostreon? sp.	Bivalve	Meissner Fm.	Busse (1972)	cemented epifaunal suspension-feeder
Encrinus (Entrochus) granulosus (MÜNSTER, 1834)	Crinoid	Schlernplateau beds	Friesenbichler et al. (2019b)	erected epifaunal suspension-feeder
Encrinus aculeatus VON MEYER, 1849	Crinoid	Jena Fm.	Schmidt (1928, 1938)	erected epifaunal suspension-feeder
Encrinus brahli OVERWEG, 1850	Crinoid	Jena Fm.	Schmidt (1928, 1938)	erected epifaunal suspension-feeder
Encrinus carnalli (BEYRICH, 1856)	Crinoid	Jena Fm.	Schmidt (1928, 1938)	erected epifaunal suspension-feeder
Encrinus cassianus LAUBE, 1864	Crinoid	Schlernplateau beds	Wöhrmann & Koken (1892)	erected epifaunal suspension-feeder
Encrinus cf. cassianus LAUBE, 1864	Crinoid	Marmolada Lmst.	Salomon (1895)	erected epifaunal suspension-feeder
Encrinus cf. liliiformis LAMARCK, 1801	Crinoid	Leidapo Mb.	Stiller (2001)	erected epifaunal suspension-feeder
Encrinus liliiformis LAMARCK, 1801	Crinoid	Jena Fm., Trochitenkalk Fm., Meissner Fm.	Schmidt (1928, 1938), Busse (1972), Hagdorn & Mundlos (1982), Hagdorn & Ockert (1993)	erected epifaunal suspension-feeder
Encrinus robustus ASSMANN, 1925	Crinoid	Jena Fm.	Schmidt (1928, 1938)	erected epifaunal suspension-feeder
Encrinus schlotheimi QUENSTEDT, 1876	Crinoid	Trochitenkalk Fm., Meissner Fm.	Schmidt (1928, 1938)	erected epifaunal suspension-feeder
Encrinus spinosus MICHAEL, 1883	Crinoid	Jena Fm., "Middle Muschelkalk"	Schmidt (1928, 1938)	erected epifaunal suspension-feeder
Entalis torquata (VON SCHLOTHEIM, 1820)	Scaphopod	Jena Fm., Trochitenkalk Fm., Meissner Fm.	Schmidt (1928, 1938), Hagdorn & Ockert (1993)	shallow infaunal deposit-feeder
Enteropleura guembeli (VON MOJSISOVICS, 1874)	Bivalve	Leidapo Mb.	Stiller (2001)	epibyssate suspension-feeder
Entolioides deeckei (PARONA, 1889)	Bivalve	Schlernplateau beds, Tubiphytes-Lmst. Mb.	Wöhrmann & Koken (1892), Friesenbichler et al. (2019a, b)	free-lying suspension-feeder
Entolioides sp.	Bivalve	Zhitkov Fm.	Shigeta et al. (2009)	free-lying suspension-feeder
Entolioides subdemissus (MÜNSTER, 1841)	Bivalve	Schlernplateau beds	Friesenbichler et al. (2019b)	free-lying suspension-feeder
Entolioides zitteli (VON WÖHRMANN & KOKEN, 1892)	Bivalve	Schlernplateau beds	Wöhrmann & Koken (1892), Friesenbichler et al. (2019b)	free-lying suspension-feeder
Entolioides? sp.	Bivalve	Felsöörs Fm.	Vörös (2003)	ecology unsure
Entolium cf. kellneri (KITTL, 1903)	Bivalve	Felsöörs Fm.	Vörös (2003)	free-lying suspension-feeder
Entolium cf. undiferum (BITTNER, 1895)	Bivalve	Leidapo Mb.	Stiller (2001)	free-lying suspension-feeder
Entolium discites (VON SCHLOTHEIM, 1820)	Bivalve	Campil Mb., Cencenighe Mb., Zuhanya Lmst., Felsöörs Fm., Leidapo Mb., Val Badia Mb., Erfurt Fm., Hidegkut Fm., Jena Fm., Meissner Fm., "Middle Muschelkalk", Röt Fm., Trochitenkalk Fm., Marmolada Lmst., Latemar Lmst.	Schmidt (1928, 1938), Busse (1972), Hagdorn & Ockert (1993), Salomon (1895), Wilckens (1909), Friesenbichler et al. (unpublished data), Ockert (1993), Stiller (2001), Foster & Sebe (2017), Vörös (2003), Bittner (1901), Broglio Loriga et al. (1990), Neri & Posenato (1985)	free-lying suspension-feeder
Entolium reticulatum FRIESENBICHLER, HAUTMANN, GRĂDINARU & BUCHER, 2019	Bivalve	Tubiphytes-Lmst. Mb.	Friesenbichler et al. (2019a)	free-lying suspension-feeder
Entolium sp.	Bivalve	Csopak Marl	Broglio Loriga et al. (1990)	free-lying suspension-feeder
Entolium sp.	Bivalve	Tubiphytes-Lmst. Mb.	Friesenbichler et al. (2019a)	free-lying suspension-feeder
Entolium sp.	Bivalve	Campil Mb.	Hofmann et al. (2015)	free-lying suspension-feeder
Entrochus dubius BEYRICH	Crinoid	Jena Fm.	Schmidt (1928, 1938)	erected epifaunal suspension-feeder
Eobuchia sp.	Bivalve	Lower Shale Unit	Brayard et al. (2017)	epibyssate suspension-feeder
Euchrysalis fusiformis (MÜNSTER, 1841)	Gastropod	Marmolada Lmst.	Böhm (1895)	epifaunal herbivore and/or detritus-feeder
Eucochlis obliquecostata NÜTZEL in HAUTMANN ET AL., 2015	Gastropod	Luolou Fm., Daye Fm.	Hautmann et al. (2015), Foster et al. (2019)	epifaunal herbivore and/or detritus-feeder
Eucycloscala binodosa (MÜNSTER, 1841)	Gastropod	Leidapo Mb., Marmolada Lmst.	Stiller (2001), Yin & Yochelson (1983c), Böhm (1895)	epifaunal herbivore and/or detritus-feeder
Eucycloscala n. sp. A	Gastropod	Leidapo Mb.	Stiller (2001)	epifaunal herbivore and/or detritus-feeder
Eucycloscala n. sp. B	Gastropod	Leidapo Mb.	Stiller (2001)	epifaunal herbivore and/or detritus-feeder
Eucycloscala n. sp. C	Gastropod	Leidapo Mb.	Stiller (2001)	epifaunal herbivore and/or detritus-feeder
Eucycloscala obliquicostata YIN & YOLCHELSON, 1983	Gastropod	Leidapo Mb.	Stiller (2001), Yin & Yochelson (1983b)	epifaunal herbivore and/or detritus-feeder
Eucycloscala rombergi HÄBERLE, 1908	Gastropod	Latemar Lmst.	Häberle (1908)	epifaunal herbivore and/or detritus-feeder
Eucycloscala sp.	Gastropod	Leidapo Mb.	Stiller (2001)	epifaunal herbivore and/or detritus-feeder
Eucycloscala spinulosa (LAUBE, 1868)	Gastropod	Leidapo Mb.	Stiller (2001), Yin & Yochelson (1986)	epifaunal herbivore and/or detritus-feeder
Eulima striatissima BÖHM, 1895	Gastropod	Marmolada Lmst.	Böhm (1895)	epifaunal herbivore and/or detritus-feeder
Eumorphotis amplicostata CIRIACKS, 1963	Bivalve	Dinwoody Fm.	Hofmann et al. (2013a)	epibyssate suspension-feeder
Eumorphotis beneckei (BITTNER, 1901)	Bivalve	Sinbad Fm.	Hofmann et al. (2014)	epibyssate suspension-feeder
Eumorphotis cf. beneckei (BITTNER, 1901)	Bivalve	Campil Mb., Cencenighe Mb.	Neri & Posenato (1985), Hofmann et al. (2015)	epibyssate suspension-feeder
Eumorphotis cf. ericius HAUTMANN, SMITH, MCGOWAN & BUCHER, 2013	Bivalve	Dinwoody Fm.	Hofmann et al. (2013a)	epibyssate suspension-feeder
Eumorphotis cf. hinnitidea (BITTNER, 1898)	Bivalve	Seis Mb., Val Badia Mb., Gastropod Oolithe	Broglio Loriga et al. (1990), Hofmann et al. (2015)	epibyssate suspension-feeder
Eumorphotis cf. kittli (BITTNER, 1900)	Bivalve	Szin Marl Fm.	Foster et al. (2015)	epibyssate suspension-feeder
Eumorphotis cf. multiformis (BITTNER, 1899)	Bivalve	Virgin Fm.	Hautmann et al. (2013)	epibyssate suspension-feeder
Eumorphotis cf. venetiana (VON HAUER, 1850)	Bivalve	Bodvaszilas Sandst. Fm.	Foster et al. (2015)	epibyssate suspension-feeder
Eumorphotis ericius HAUTMANN, SMITH, MCGOWAN & BUCHER, 2013	Bivalve	Virgin Fm.	Hautmann et al. (2013), Hofmann et al. (2013b)	epibyssate suspension-feeder
Eumorphotis hinnitidea (BITTNER, 1898)	Bivalve	Bodvaszilas Sandst. Fm., Gastropod Oolithe, Campil Mb., Hidegkut Fm.	Foster et al. (2015), Broglio Loriga et al. (1990)	epibyssate suspension-feeder
Eumorphotis kittli (BITTNER, 1900)	Bivalve	Val Badia Mb.	Broglio Loriga et al. (1990)	epibyssate suspension-feeder
Eumorphotis multiformis (BITTNER, 1899)	Bivalve	Mazzin Mb., Bodvaszilas Sandst. Fm., Dinwoody Fm., Seis Mb., Gastropod Oolithe, Campil Mb., Sinbad Fm., Cencenighe Mb., Zhitkov Fm.	Foster et al. (2015, 2017b), Hofmann et al. (2013a, 2014, 2015), Foster et al. (2017b), Shigeta et al. (2009)	epibyssate suspension-feeder
Eumorphotis reticulata (RICHTHOFEN, 1860)	Bivalve	Val Badia Mb., Cencenighe Mb.	Broglio Loriga et al. (1990), Neri & Posenato (1985)	epibyssate suspension-feeder
Eumorphotis shajingengi HAUTMANN, BUCHER, BRÜHWILER, GOUDEMAND, KAIM & NÜTZEL, 2011	Bivalve	Luolou Fm., Daye Fm.	Hautmann et al. (2015), Foster et al. (2019)	epibyssate suspension-feeder
Eumorphotis sp.	Bivalve	Mazzin Mb., Seis Mb.	Hofmann et al. (2015)	epibyssate suspension-feeder
Eumorphotis sp.	Bivalve	Andraz Horizon	Foster et al. (2017b)	epibyssate suspension-feeder
Eumorphotis telleri (BITTNER, 1899)	Bivalve	Val Badia Mb., Cencenighe Mb., Csopak Marl	Broglio Loriga et al. (1990), Budai (2008), Hofmann et al. (2015), Neri & Posenato (1985)	epibyssate suspension-feeder
Eumorphotis tenuistriata (BITTNER, 1899)	Bivalve	Cencenighe Mb.	Neri & Posenato (1985)	epibyssate suspension-feeder
Eumorphotis venetiana (VON HAUER, 1850)	Bivalve	Virgin Fm., Gastropod Oolithe, Campil Mb.	Hautmann et al. (2013), Broglio Loriga et al. (1990)	epibyssate suspension-feeder
Eumorphotis virginensis HAUTMANN, SMITH, MCGOWAN & BUCHER, 2013	Bivalve	Virgin Fm.	Hautmann et al. (2013), Hofmann et al. (2013b)	epibyssate suspension-feeder
Eunemopsis epaphus (LAUBE, 1869)	Gastropod	Marmolada Lmst.	Böhm (1895)	epifaunal herbivore and/or detritus-feeder
Eunemopsis praecurrens KITTL, 1894	Gastropod	Marmolada Lmst.	Böhm (1895)	epifaunal herbivore and/or detritus-feeder
Euomphalus (Woehrmannia) cirridioides KITTL, 1894	Gastropod	Marmolada Lmst.	Böhm (1895)	epifaunal herbivore and/or detritus-feeder
Euomphalus exiguus PHILIPPI	Gastropod	Jena Fm.	Schmidt (1928, 1938)	epifaunal herbivore and/or detritus-feeder
Euomphalus indet. sensu YIN & YOLCHELSON, 983	Gastropod	Leidapo Mb.	Stiller (2001)	epifaunal herbivore and/or detritus-feeder
Euomphalus lottneri ECK, 1865	Gastropod	Jena Fm.	Schmidt (1928, 1938)	epifaunal herbivore and/or detritus-feeder
Euomphalus qingyanensis YIN & YOLCHELSON, 1983	Gastropod	Leidapo Mb.	Stiller (2001), Yin & Yochelson (1983c)	epifaunal herbivore and/or detritus-feeder
Euryalox applanatus NÜTZEL, KAIM & GRĂDINARU, 2018	Gastropod	Tubiphytes-Lmst. Mb.	Nützel et al. (2018)	epifaunal herbivore and/or detritus-feeder
Euryalox subcancellata (D'ORBIGNY, 1849)	Gastropod	Leidapo Mb.	Yin & Yochelson (1983c)	epifaunal herbivore and/or detritus-feeder
Euspira saginata BÖHM, 1895	Gastropod	Marmolada Lmst.	Böhm (1895)	epifaunal herbivore and/or detritus-feeder
Eustylus aequalis BÖHM, 1895	Gastropod	Marmolada Lmst.	Böhm (1895)	epifaunal herbivore and/or detritus-feeder
Eustylus cf. semiglaber (MÜNSTER, 1841)	Gastropod	Marmolada Lmst.	Böhm (1895)	epifaunal herbivore and/or detritus-feeder
Eustylus curretensis KITTL, 1894	Gastropod	Marmolada Lmst.	Böhm (1895)	epifaunal herbivore and/or detritus-feeder
Eustylus minor KITTL, 1894	Gastropod	Marmolada Lmst.	Böhm (1895)	epifaunal herbivore and/or detritus-feeder
Eustylus semiglaber (MÜNSTER, 1841)	Gastropod	Latemar Lmst.	Friesenbichler et al. (unpublished data)	epifaunal herbivore and/or detritus-feeder
Euzone n. sp.	Gastropod	Leidapo Mb.	Stiller (2001)	epifaunal herbivore and/or detritus-feeder
Fedaiella beneckei BÖHM, 1895	Gastropod	Marmolada Lmst.	Böhm (1895)	epifaunal herbivore and/or detritus-feeder
Fedaiella cuccensis VON MOJSISOVICS, 1873	Gastropod	Marmolada Lmst.	Böhm (1895)	epifaunal herbivore and/or detritus-feeder
Fedaiella magna PICARD, 1903	Gastropod	Jena Fm.	Schmidt (1928, 1938)	epifaunal herbivore and/or detritus-feeder
Fossariopsis glabrata (KITTL, 1894)	Gastropod	Marmolada Lmst.	Böhm (1895)	epifaunal herbivore and/or detritus-feeder
Fossariopsis sinense YIN & YOLCHELSON, 1983	Gastropod	Leidapo Mb.	Stiller (2001), Yin & Yochelson (1983b)	epifaunal herbivore and/or detritus-feeder
Fritschia multicostata PICARD, 1903	Gastropod	Jena Fm.	Schmidt (1928, 1938)	epifaunal herbivore and/or detritus-feeder
Fritschia paucicostata PICARD, 1903	Gastropod	Jena Fm.	Schmidt (1928, 1938)	epifaunal herbivore and/or detritus-feeder
Frombachia uhligi BLASCHKE, 1905	Gastropod	Schlernplateau beds	Blaschke (1905), Friesenbichler et al. (2019b)	epifaunal herbivore and/or detritus-feeder
Gastropod indet.	Gastropod	Virgin Fm.	Hofmann et al. (2013b)	epifaunal herbivore and/or detritus-feeder
Gastropod indet.	Gastropod	Leidapo Mb.	Stiller (2001)	epifaunal herbivore and/or detritus-feeder
Gastropod indet. A	Gastropod	Latemar Lmst.	Friesenbichler et al. (unpublished data)	epifaunal herbivore and/or detritus-feeder
Gastropod indet. B	Gastropod	Latemar Lmst.	Friesenbichler et al. (unpublished data)	epifaunal herbivore and/or detritus-feeder
Gastropod indet. C	Gastropod	Latemar Lmst.	Friesenbichler et al. (unpublished data)	epifaunal herbivore and/or detritus-feeder
Gastropod indet. D	Gastropod	Latemar Lmst.	Friesenbichler et al. (unpublished data)	epifaunal herbivore and/or detritus-feeder
Gastropod indet. E	Gastropod	Latemar Lmst.	Friesenbichler et al. (unpublished data)	epifaunal herbivore and/or detritus-feeder
Gastropod indet. F	Gastropod	Latemar Lmst.	Friesenbichler et al. (unpublished data)	epifaunal herbivore and/or detritus-feeder
Gastropod indet. G	Gastropod	Latemar Lmst.	Friesenbichler et al. (unpublished data)	epifaunal herbivore and/or detritus-feeder
Gastropod indet. H	Gastropod	Latemar Lmst.	Friesenbichler et al. (unpublished data)	epifaunal herbivore and/or detritus-feeder
Gervillaria cf. hartmanni (MÜNSTER, 1834)	Bivalve	Felsöörs Fm.	Vörös (2003)	endobyssate suspension-feeder
Gervillaria subelegans (CHEN in GU ET AL., 1976)	Bivalve	Tubiphytes-Lmst. Mb., Leidapo Mb.	Friesenbichler et al. (2019a), Stiller (2001), Komatsu et al. (2004)	free-lying suspension-feeder
Gervilleia albertii (CREDNER, 1854)	Bivalve	Jena Fm.	Schmidt (1928, 1938)	endobyssate suspension-feeder
Gervilleia angusta GOLDFUSS, 1838	Bivalve	Latemar Lmst.	Wilckens (1909)	epibyssate suspension-feeder
Gervilleia cf. costata (VON SCHLOTHEIM, 1820)	Bivalve	Meissner Fm.	Busse (1972)	endobyssate suspension-feeder
Gervilleia cuneata SANDBERGER, 1868	Bivalve	Trochitenkalk Fm., Meissner Fm.	Schmidt (1928, 1938)	endobyssate suspension-feeder
Gervilleia modiola FRECH, 1912	Bivalve	Röt Fm., Jena Fm.	Schmidt (1928, 1938)	endobyssate suspension-feeder
Gervilleia mytiloides (VON SCHLOTHEIM, 1820)	Bivalve	Viganvar, Röt Fm., Lapis Lmst., Jena Fm., Trochitenkalk Fm., Meissner Fm.	Foster & Sebe (2017), Schmidt (1928, 1938)	endobyssate suspension-feeder
Gervilleia substriata CREDNER, 1851	Bivalve	Trochitenkalk Fm., Meissner Fm., Erfurt Fm.	Schmidt (1928, 1938)	endobyssate suspension-feeder
Gervilleia? n. sp.	Bivalve	Meissner Fm.	Busse (1972)	ecology unsure
Gervillella? albertii (MÜNSTER, 1838)	Bivalve	Daye Fm.	Foster et al. (2019)	endobyssate suspension-feeder
Gervillia (Cultriopsis) angulata (MÜNSTER, 1841)	Bivalve	Leidapo Mb.	Stiller (2001)	epibyssate suspension-feeder
Glabrocingulum parvum FOSTER, DANISE & TWITCHETT, 2017	Gastropod	Deltadalen Mb.	Foster et al. (2017a)	epifaunal herbivore and/or detritus-feeder
Glabrocingulum sp.	Gastropod	Daye Fm.	Foster et al. (2019)	epifaunal herbivore and/or detritus-feeder
Goniophorina (Goniophorina) n. sp.	Bivalve	Leidapo Mb.	Stiller (2001)	shallow to moderately deep infaunal suspension-feeder
Gonodon angulatum SALOMON, 1895	Bivalve	Marmolada Lmst.	Salomon (1895)	shallow to moderately deep infaunal suspension-feeder
Gonodon cf. esinense STOPPANI, 1858	Bivalve	Marmolada Lmst.	Salomon (1895)	shallow to moderately deep infaunal suspension-feeder
Gonodon n. sp. ex aff. Gonodon subquadratum (PARONA, 1889)	Bivalve	Marmolada Lmst.	Salomon (1895)	shallow to moderately deep infaunal suspension-feeder
Gonodon rugosus ASSMANN, 1915	Bivalve	Jena Fm.	Schmidt (1928, 1938)	shallow to moderately deep infaunal suspension-feeder
Gradiella n. sp. A	Gastropod	Leidapo Mb.	Stiller (2001)	epifaunal herbivore and/or detritus-feeder
Guizhouia kokeni YIN & YOCHELSON, 1983	Gastropod	Leidapo Mb.	Yin & Yochelson (1983b)	epifaunal herbivore and/or detritus-feeder
Halobia cassiana (VON MOJSISOVICS, 1874)	Bivalve	Marmolada Lmst.	Salomon (1895)	ecology unsure
Halobia lommeli WISSMANN, 1841	Bivalve	Marmolada Lmst.	Salomon (1895)	ecology unsure
Halobia parthanensis (SCHAFHÄUTL, 1863)	Bivalve	Marmolada Lmst.	Salomon (1895)	ecology unsure
Heminajas fissidentata (VON WÖHRMANN, 1889)	Bivalve	Schlernplateau beds	Wöhmann & Koken (1892), Friesenbichler et al. (2019b)	shallow to moderately deep infaunal suspension-feeder
Heminajas? cf. balatonis (FRECH, 1905)	Bivalve	Virgin Fm.	Hautmann et al. (2013)	shallow to moderately deep infaunal suspension-feeder
Heminajas? sp.	Bivalve	Tubiphytes-Lmst. Mb.	Friesenbichler et al. (2019a)	shallow to moderately deep infaunal suspension-feeder
Hirsutella multicostata (YANG & XU, 1966)	Brachiopod	Leidapo Mb.	Stiller (2001)	pedunculate suspension-feeder
Hirsutina hirsuta (VON ALBERTI, 1864)	Brachiopod	Jena Fm.	Schmidt (1928, 1938)	pedunculate suspension-feeder
Hoernesia socialis (VON SCHLOTHEIM, 1823)	Bivalve	Viganvar, Röt Fm., Jena Fm., Zuhanya Lmst., "Middle Muschelkalk", Trochitenkalk Fm., Meissner Fm., Erfurt Fm.	Schmidt (1928, 1938), Busse (1972), Hagdorn & Ockert (1993), Ockert (1993), Foster & Sebe (2017), Urlichs (1992)	endobyssate suspension-feeder
Hoernesia sp.	Bivalve	Cencenighe Mb.	Neri & Posenato (1985)	endobyssate suspension-feeder
Hoernesia subglobosa CREDNER, 1854	Bivalve	Jena Fm., Meissner Fm.	Schmidt (1928, 1938)	endobyssate suspension-feeder
Hoernesia? danisae FOSTER, LEHRMANN, HIRTZ, WHITE, YU, LI & MARTINDALE, 2019	Bivalve	Daye Fm.	Foster et al. (2019)	endobyssate suspension-feeder
Holcorhynchella delicatula (BITTNER, 1890)	Brachiopod	Felsöörs Fm.	Vörös (2003)	pedunculate suspension-feeder
Holocrinidae n. sp. indet.	Crinoid	Lower Shale Unit	Brayard et al. (2017)	erected epifaunal suspension-feeder
Holocrinus beyrichi (PICARD, 1883)	Crinoid	Jena Fm.	Schmidt (1928, 1938)	erected epifaunal suspension-feeder
Holocrinus cf. dubius (GOLDFUSS, 1831)	Crinoid	Virgin Fm.	McGowan et al. (2009)	erected epifaunal suspension-feeder
Holocrinus sp.	Crinoid	Virgin Fm.	Hofmann et al. (2013b)	erected epifaunal suspension-feeder
Holocrinus sp.	Crinoid	Zhitkov Fm.	Shigeta et al.(2009)	erected epifaunal suspension-feeder
Holocrinus sp.	Crinoid	Lapis Lmst., Zuhanya Lmst.	Foster & Sebe (2017)	erected epifaunal suspension-feeder
Holocrinus wagneri (BENECKE, 1887)	Crinoid	Jena Fm.	Schmidt (1928, 1938)	erected epifaunal suspension-feeder
Hologyra (Vernelia) fastigata (STOPPANI, 1857)	Gastropod	Marmolada Lmst.	Böhm (1895)	epifaunal herbivore and/or detritus-feeder
Hologyra (Vernelia) sublimneiformis (KITTL, 1894)	Gastropod	Marmolada Lmst.	Böhm (1895)	epifaunal herbivore and/or detritus-feeder
Hologyra (Vernelia) vincta BÖHM, 1895	Gastropod	Marmolada Lmst.	Böhm (1895)	epifaunal herbivore and/or detritus-feeder
Hologyra alpina KOKEN, 1892	Gastropod	Marmolada Lmst., Schlernplateau beds	Böhm (1895), Wöhrmann & Koken (1892)	epifaunal herbivore and/or detritus-feeder
Hologyra amabilis HOHENSTEIN, 1913	Gastropod	"Middle Muschelkalk", Trochitenkalk Fm.	Schmidt (1928, 1938), Ockert (1993)	epifaunal herbivore and/or detritus-feeder
Hologyra bicarinata KOKEN, 1898	Gastropod	Meissner Fm.	Schmidt (1928, 1938)	epifaunal herbivore and/or detritus-feeder
Hologyra carinata KOKEN, 1892	Gastropod	Schlernplateau beds	Wöhrmann & Koken (1892)	epifaunal herbivore and/or detritus-feeder
Hologyra cf. involuta (KITTL, 1892)	Gastropod	Schlernplateau beds	Blaschke (1905)	epifaunal herbivore and/or detritus-feeder
Hologyra elegans BÖHM, 1895	Gastropod	Marmolada Lmst., Latemar Lmst.	Böhm (1895), Häberle (1908)	epifaunal herbivore and/or detritus-feeder
Hologyra elevata BÖHM, 1895	Gastropod	Marmolada Lmst.	Böhm (1895)	epifaunal herbivore and/or detritus-feeder
Hologyra elongata (MÜNSTER, 1841)	Gastropod	Latemar Lmst.	Häberle (1908)	epifaunal herbivore and/or detritus-feeder
Hologyra excelsa VON HAUER	Gastropod	Latemar Lmst.	Häberle (1908)	epifaunal herbivore and/or detritus-feeder
Hologyra eyerichi (NOETLING, 1880)	Gastropod	Jena Fm., "Middle Muschelkalk", Meissner Fm.	Schmidt (1928, 1938), Busse (1972)	epifaunal herbivore and/or detritus-feeder
Hologyra guizhoui YIN & YOLCHELSON, 1983	Gastropod	Leidapo Mb.	Stiller (2001), Yin & Yochelson (1983b)	epifaunal herbivore and/or detritus-feeder
Hologyra kokeni BÖHM, 1895	Gastropod	Marmolada Lmst.	Böhm (1895)	epifaunal herbivore and/or detritus-feeder
Hologyra laevissima (KITTL, 1894)	Gastropod	Latemar Lmst., Marmolada Lmst.	Böhm (1895), Häberle (1908)	epifaunal herbivore and/or detritus-feeder
Hologyra n. sp. PICARD, 1903	Gastropod	Jena Fm.	Schmidt (1928, 1938)	epifaunal herbivore and/or detritus-feeder
Hologyra noetlingi KOKEN, 1892	Gastropod	Jena Fm.	Schmidt (1928, 1938)	epifaunal herbivore and/or detritus-feeder
Hologyra ogilviae BÖHM, 1895	Gastropod	Marmolada Lmst.	Böhm (1895)	epifaunal herbivore and/or detritus-feeder
Hologyra ovulum (STOPPANI, 1858)	Gastropod	Latemar Lmst.	Häberle (1908)	epifaunal herbivore and/or detritus-feeder
Hologyra sp. KOKEN, 1898	Gastropod	Trochitenkalk Fm., Meissner Fm.	Schmidt (1928, 1938)	epifaunal herbivore and/or detritus-feeder
Hologyra stoppanii BÖHM, 1895	Gastropod	Marmolada Lmst.	Böhm (1895)	epifaunal herbivore and/or detritus-feeder
Hologyra? (Vernelia) dissimilis BÖHM, 1895	Gastropod	Marmolada Lmst.	Böhm (1895)	epifaunal herbivore and/or detritus-feeder
Homoeorhynchia? sp.	Brachiopod	Felsöörs Fm.	Vörös (2003)	pedunculate suspension-feeder
Homomya albertii (VOLZ, 1837)	Bivalve	Jena Fm.	Schmidt (1928, 1938)	deep infaunal suspension-feeder
Homomya althausi (VON ALBERTI, 1864)	Bivalve	Röt Fm., Jena Fm.	Schmidt (1928, 1938)	deep infaunal suspension-feeder
Homomya impressa (VON ALBERTI, 1864)	Bivalve	Jena Fm., Erfurt Fm.	Schmidt (1928, 1938)	deep infaunal suspension-feeder
Hypsipleura cathedralis WÖHRMANN & KOKEN, 1892	Gastropod	Schlernplateau beds	Wöhrmann & Koken (1892)	epifaunal herbivore and/or detritus-feeder
Hypsipleura cf. subnodosa (VON KLIPSTEIN, 1843)	Gastropod	Marmolada Lmst.	Böhm (1895)	epifaunal herbivore and/or detritus-feeder
Joannina aff. joannae WAAGEN, 1906	Bivalve	Tubiphytes-Lmst. Mb.	Friesenbichler et al. (2019a)	endobyssate suspension-feeder
Katosira fragilis VON WÖHRMANN & KOKEN, 1892	Gastropod	Schlernplateau beds	Wöhrmann & Koken (1892), Friesenbichler et al. (2019b)	epifaunal herbivore and/or detritus-feeder
Katosira solitaria PHILIPPI, 1898	Gastropod	Meissner Fm.	Schmidt (1928, 1938)	epifaunal herbivore and/or detritus-feeder
Katosira? abbreviata VON WÖHRMANN & KOKEN, 1892	Gastropod	Schlernplateau beds	Wöhrmann & Koken (1892)	epifaunal herbivore and/or detritus-feeder
Kittliconcha sciaphostera BATTEN & STOKES, 1986	Gastropod	Sinbad Fm.	Batten & Stokes (1986)	epifaunal herbivore and/or detritus-feeder
Kittliconcha? obesa YU, PAN & WANG, 1974	Gastropod	Leidapo Mb.	Stiller (2001)	epifaunal herbivore and/or detritus-feeder
Koeveskallina koeveskalyensis (STUR, 1865)	Brachiopod	Felsöörs Fm.	Vörös (2003)	pedunculate suspension-feeder
Koeveskallina paleotypus (LORETZ, 1875)	Brachiopod	Felsöörs Fm.	Vörös (2003)	pedunculate suspension-feeder
Koeveskallina sp. A	Brachiopod	Tubiphytes-Lmst. Mb.	Grădinaru & Gaetani (2019)	pedunculate suspension-feeder
Koeveskallina sp. B	Brachiopod	Tubiphytes-Lmst. Mb.	Grădinaru & Gaetani (2019)	pedunculate suspension-feeder
Koninekella triadica BITTNER, 1886	Brachiopod	Marmolada Lmst.	Salomon (1895)	pedunculate suspension-feeder
Ladinaticella simionescui NÜTZEL, KAIM & GRĂDINARU, 2018	Gastropod	Tubiphytes-Lmst. Mb.	Nützel et al. (2018)	epifaunal herbivore and/or detritus-feeder
Laevidentalium bangtoupoensis STILLER, 2001	Scaphopod	Leidapo Mb.	Stiller (2001)	shallow infaunal deposit-feeder
Laevidentalium laeve (VON SCHLOTHEIM, 1820)	Scaphopod	Jena Fm., Trochitenkalk Fm., Meissner Fm.	Schmidt (1928, 1938), Hagdorn & Ockert (1993), Ockert (1993)	shallow infaunal deposit-feeder
Laevidentalium? sp.	Scaphopod	Zhitkov Fm.	Shigeta et al. (2009)	shallow infaunal deposit-feeder
Leda becki PHILIPPI, 1898	Bivalve	Meissner Fm.	Schmidt (1928, 1938)	shallow infaunal deposit-feeder
Leda schlotheimensis (PICARD, 1858)	Bivalve	Jena Fm., "Middle Muschelkalk", Trochitenkalk Fm., Meissner Fm.	Schmidt (1928, 1938)	shallow infaunal deposit-feeder
Leda wieslochensis GRUBER, 1932	Bivalve	Trochitenkalk Fm., Meissner Fm.	Schmidt (1928, 1938)	shallow infaunal deposit-feeder
Leiolepismatina semiconula YANG & XU, 1966	Brachiopod	Leidapo Mb.	Stiller (2001)	pedunculate suspension-feeder
Lepetopsis cf. petricola (KITTL, 1894)	Gastropod	Schlernplateau beds	Blaschke (1905)	epifaunal herbivore and/or detritus-feeder
Lepetopsis petricola (KITTL, 1894)	Gastropod	Marmolada Lmst.	Böhm (1895)	epifaunal herbivore and/or detritus-feeder
Lepismatina hsui WANG, 1955	Brachiopod	Leidapo Mb.	Stiller (2001)	pedunculate suspension-feeder
Leproconcha paradoxa GIEBEL, 1856	Bivalve	Jena Fm.	Schmidt (1928, 1938)	ecology unsure
Leptochondria albertii (GOLDFUSS, 1838)	Bivalve	Luolou Fm., Cencenighe Mb., Csopak Marl, Leidapo Mb., Röt Fm., Jena Fm., Trochitenkalk Fm., Meissner Fm., Erfurt Fm., Marmolada Lmst.	Schmidt (1928, 1938), Hagdorn & Ockert (1993), Broglio Loriga et al. (1990), Budai (2008), Ockert (1993), Stiller (2001), Komatsu et al. (2004), Hautmann et al. (2015), Neri & Posenato (1985), Hofmann et al. (2015), Salomon (1895)	epibyssate suspension-feeder
Leptochondria cf. viezzenensis (WILCKENS, 1909)	Bivalve	Felsöörs Fm.	Vörös (2003)	epibyssate suspension-feeder
Leptochondria curtocardinalis (HALL & WHITFIELD, 1877)	Bivalve	Virgin Fm., Lower Shale Unit	Hautmann et al. (2013), Hofmann et al. (2013b), Brayard et al. (2017)	epibyssate suspension-feeder
Leptochondria minima (KIPARISOVA, 1938)	Bivalve	Lazurnaya Bay Fm., Zhitkov Fm.	Shigeta et al. (2009)	epibyssate suspension-feeder
Leptochondria n. sp. A	Bivalve	Leidapo Mb.	Stiller (2001)	epibyssate suspension-feeder
Leptochondria n. sp. B	Bivalve	Leidapo Mb.	Stiller (2001)	epibyssate suspension-feeder
Leptochondria nuetzeli HAUTMANN, SMITH, MCGOWAN & BUCHER, 2013	Bivalve	Virgin Fm.	Hautmann et al. (2013), Hofmann et al. (2013b)	epibyssate suspension-feeder
Leptochondria occidanea (MEEK, 1877)	Bivalve	Dinwoody Fm., Sinbad Fm.	Hofmann et al. (2013a, 2014)	epibyssate suspension-feeder
Leptochondria paradoxica CHEN	Bivalve	Leidapo Mb.	Komatsu et al. (2004)	epibyssate suspension-feeder
Leptochondria pervulgata (BITTNER, 1902)	Bivalve	Tubiphytes-Lmst. Mb.	Friesenbichler et al. (2019a)	epibyssate suspension-feeder
Leptochondria plana YIN & YIN, 1983	Bivalve	Leidapo Mb.	Stiller (2001)	epibyssate suspension-feeder
Leptochondria separata (REIS, 1926)	Bivalve	Tubiphytes-Lmst. Mb.	Friesenbichler et al. (2019a)	epibyssate suspension-feeder
Leptochondria sp.	Bivalve	Daye Fm.	Foster et al. (2019)	epibyssate suspension-feeder
Leptochondria subillyrica (XU, 1937)	Bivalve	Leidapo Mb.	Stiller (2001), Komatsu et al. (2004)	epibyssate suspension-feeder
Leptochondria viezzenensis (WILCKENS, 1909)	Bivalve	Tubiphytes-Lmst. Mb., Latemar Lmst.	Friesenbichler et al. (2019a; unpublished data)	epibyssate suspension-feeder
Leptochondria xijinwulanensis SHA, 1995	Bivalve	Sinbad Fm.	Hofmann et al. (2014)	epibyssate suspension-feeder
Leptochondria? sp. A	Bivalve	Felsöörs Fm.	Vörös (2003)	epibyssate suspension-feeder
Leptochondria? sp. B	Bivalve	Felsöörs Fm.	Vörös (2003)	epibyssate suspension-feeder
Lima (Plagiostoma) cf. alternans (BITTNER, 1895)	Bivalve	Latemar Lmst.	Wilckens (1909)	epibyssate suspension-feeder
Lima (Radula) skuphi SALOMON, 1895	Bivalve	Marmolada Lmst.	Salomon (1895)	epibyssate suspension-feeder
Lima angustestriata ASSMANN, 1937	Bivalve	Jena Fm.	Schmidt (1928, 1938)	epibyssate suspension-feeder
Lima cainalli STOPPANI, 1860	Bivalve	Marmolada Lmst.	Salomon (1895)	epibyssate suspension-feeder
Lima sp.	Bivalve	Marmolada Lmst.	Salomon (1895)	epibyssate suspension-feeder
Lima wagneri ASSMANN, 1937	Bivalve	Trochitenkalk Fm., Meissner Fm.	Schmidt (1928, 1938)	epibyssate suspension-feeder
Lima? fassaensis SALOMON, 1895	Bivalve	Marmolada Lmst.	Salomon (1895)	epibyssate suspension-feeder
Lima? finkelsteini SALOMON, 1895	Bivalve	Marmolada Lmst.	Salomon (1895)	epibyssate suspension-feeder
Limea (Pseudolimea?) sp.	Bivalve	Felsöörs Fm.	Vörös (2003)	epibyssate suspension-feeder
Limidae? indet.	Bivalve	Felsöörs Fm.	Vörös (2003)	ecology unsure
Limulus bronni SCHIMPER, 1850	Crustacean	Röt Fm.	Schmidt (1928, 1938)	epifaunal carnivore
Limulus henkeli VON FRITSCH, 1906	Crustacean	Jena Fm.	Schmidt (1928, 1938)	epifaunal carnivore
Limulus priscus MÜNSTER, 1839	Crustacean	Meissner Fm.	Schmidt (1928, 1938)	epifaunal carnivore
Limulus sandbergeri KIRCHNER, 1923	Crustacean	Röt Fm.	Schmidt (1928, 1938)	epifaunal carnivore
Lingula borealis BITTNER, 1899	Brachiopod	Lazurnaya Bay Fm., Dinwoody Fm., Lower Shale Unit, Sinbad Fm.	Hofmann et al. (2013a, 2014), Shigeta et al. (2009), Brayard et al. (2017)	shallow to moderately deep infaunal suspension-feeder
Lingula cf. borealis BITTNER, 1899	Brachiopod	Seis Mb., Gastropod Oolithe	Broglio Loriga et al. (1990)	shallow to moderately deep infaunal suspension-feeder
Lingula cf. tenuissima (BRONN, 1837)	Brachiopod	Felsöörs Fm.	Vörös (2003)	shallow to moderately deep infaunal suspension-feeder
Lingula keuperea ZENKER, 1834	Brachiopod	Meissner Fm., Erfurt Fm.	Schmid (1938)	shallow to moderately deep infaunal suspension-feeder
Lingula sp.	Brachiopod	Csopak Marl	Broglio Loriga et al. (1990)	shallow to moderately deep infaunal suspension-feeder
Lingula tenuissima (BRONN, 1837)	Brachiopod	Röt Fm., Jena Fm., Trochitenkalk Fm., Meissner Fm., Erfurt Fm., Mazzin Mb.	Schmidt (1928, 1938), Urlichs (1992), Hofmann et al. (2014)	shallow to moderately deep infaunal suspension-feeder
Lingula zenkeri VON ALBERTI, 1864	Brachiopod	Meissner Fm., Erfurt Fm.	Schmid (1938)	shallow to moderately deep infaunal suspension-feeder
Lingularia sp.	Brachiopod	Viganvar	Foster & Sebe (2017)	shallow to moderately deep infaunal suspension-feeder
Lissochilina meta BÖHM, 1895	Gastropod	Marmolada Lmst.	Böhm (1895)	epifaunal herbivore and/or detritus-feeder
Lithodomus priscus (GIEBEL, 1856)	Bivalve	Jena Fm., Trochitenkalk Fm., Meissner Fm.	Schmidt (1928, 1938)	ecology unsure
Lithodomus rhomboidalis VON SEEBACH, 1862	Bivalve	Erfurt Fm.	Schmidt (1928, 1938)	ecology unsure
Litogaster cf. ornata (VON MEYER, 1851)	Crustacean	Jena Fm.	Schmidt (1928, 1938)	epifaunal carnivore
Litogaster obtusa VON MEYER, 1847	Crustacean	Trochitenkalk Fm., Meissner Fm.	Hagdorn & Ockert (1993)	epifaunal carnivore
Litogaster sp.	Crustacean	Trochitenkalk Fm., Meissner Fm.	Schmidt (1928, 1938)	epifaunal carnivore
Litogaster tiefenbachensis ASSMANN, 1927	Crustacean	Trochitenkalk Fm., Meissner Fm.	Schmidt (1928, 1938)	epifaunal carnivore
Litogaster tuberculata ASSMANN, 1927	Crustacean	Trochitenkalk Fm., Meissner Fm.	Schmidt (1928, 1938)	epifaunal carnivore
Litogaster venusta VON MEYER, 1856	Crustacean	Trochitenkalk Fm., Meissner Fm.	Schmidt (1928, 1938)	epifaunal carnivore
Litogaster? luxoviensis ÉTALLON, 1859	Crustacean	Röt Fm.	Schmidt (1928, 1938)	epifaunal carnivore
Litogaster? turnbullensis SCHRAM, 1971	Crustacean	Lower Shale Unit	Brayard et al. (2017)	epifaunal carnivore
Litorina cf. Turbonilla parvula DUNKER	Gastropod	Jena Fm., Meissner Fm.	Wagner (1897)	epifaunal herbivore and/or detritus-feeder
Lopha calceoformis (BROILI, 1904)	Bivalve	Leidapo Mb.	Stiller (2001)	cemented epifaunal suspension-feeder
Lopha n. sp.	Bivalve	Leidapo Mb.	Stiller (2001)	cemented epifaunal suspension-feeder
Loxonema (Allostrophia) perversum (MÜNSTER, 1841)	Gastropod	Latemar Lmst.	Häberle (1908)	epifaunal herbivore and/or detritus-feeder
Loxonema (Anoptychia) cf. canaliferum (MÜNSTER, 1841)	Gastropod	Latemar Lmst.	Häberle (1908)	epifaunal herbivore and/or detritus-feeder
Loxonema (Anoptychia) sp.	Gastropod	Latemar Lmst.	Häberle (1908)	epifaunal herbivore and/or detritus-feeder
Loxonema (Anoptychia) sp. ex. affin. L. grignensis KITTL, 1899	Gastropod	Latemar Lmst.	Häberle (1908)	epifaunal herbivore and/or detritus-feeder
Loxonema (Heterocosmia) turritum KOKEN, 1898	Gastropod	Trochitenkalk Fm., Meissner Fm.	Schmidt (1928, 1938), Busse (1972)	epifaunal herbivore and/or detritus-feeder
Loxonema (Zygopleura) katosiroides HÄBERLE, 1908	Gastropod	Latemar Lmst.	Häberle (1908)	epifaunal herbivore and/or detritus-feeder
Loxonema (Zygopleura) obliquecostatum (MÜNSTER, 1841)	Gastropod	Trochitenkalk Fm., Meissner Fm., Schlernplateau beds	Schmidt (1928, 1938), Wöhrmann & Koken (1892)	epifaunal herbivore and/or detritus-feeder
Loxonema (Zygopleura) sp. (?L. constans BÖHM, 1895)	Gastropod	Latemar Lmst.	Häberle (1908)	epifaunal herbivore and/or detritus-feeder
Loxonema cf. annae KITTL, 1894	Gastropod	Jena Fm., Trochitenkalk Fm., Meissner Fm.	Schmidt (1928, 1938)	epifaunal herbivore and/or detritus-feeder
Loxonema cf. fritschi (PICARD, 1903)	Gastropod	Trochitenkalk Fm.	Ockert (1993)	epifaunal herbivore and/or detritus-feeder
Loxonema columnare PICARD, 1903	Gastropod	Jena Fm.	Schmidt (1928, 1938)	epifaunal herbivore and/or detritus-feeder
Loxonema constans BÖHM, 1895	Gastropod	Marmolada Lmst.	Böhm (1895)	epifaunal herbivore and/or detritus-feeder
Loxonema contrictum BÖHM, 1895	Gastropod	Marmolada Lmst.	Böhm (1895)	epifaunal herbivore and/or detritus-feeder
Loxonema detritum (VON ALBERTI, 1864)	Gastropod	Jena Fm.	Schmidt (1928, 1938)	epifaunal herbivore and/or detritus-feeder
Loxonema dto. jugatum GRUBER	Gastropod	Trochitenkalk Fm., Meissner Fm.	Schmidt (1928, 1938)	epifaunal herbivore and/or detritus-feeder
Loxonema elongatum PICARD, 1903	Gastropod	Jena Fm.	Schmidt (1928, 1938)	epifaunal herbivore and/or detritus-feeder
Loxonema falcatum PICARD, 1903	Gastropod	Jena Fm.	Schmidt (1928, 1938)	epifaunal herbivore and/or detritus-feeder
Loxonema fritschi (PICARD, 1903)	Gastropod	Jena Fm.	Schmidt (1928, 1938)	epifaunal herbivore and/or detritus-feeder
Loxonema hybridum (MÜNSTER, 1841)	Gastropod	Marmolada Lmst.	Böhm (1895)	epifaunal herbivore and/or detritus-feeder
Loxonema insociale KITTL, 1894	Gastropod	Marmolada Lmst.	Böhm (1895)	epifaunal herbivore and/or detritus-feeder
Loxonema invariabile KITTL, 1894	Gastropod	Marmolada Lmst.	Böhm (1895)	epifaunal herbivore and/or detritus-feeder
Loxonema janus (KITTL, 1894)	Gastropod	"Middle Muschelkalk"	Schmidt (1928, 1938)	epifaunal herbivore and/or detritus-feeder
Loxonema johannisboehmi PHILLIPI, 1898	Gastropod	Trochitenkalk Fm., Meissner Fm.	Schmidt (1928, 1938), Busse (1972)	epifaunal herbivore and/or detritus-feeder
Loxonema kokeni PICARD, 1903	Gastropod	Jena Fm.	Schmidt (1928, 1938)	epifaunal herbivore and/or detritus-feeder
Loxonema lommeli (MÜNSTER, 1841)	Gastropod	"Middle Muschelkalk", Trochitenkalk Fm., Meissner Fm.	Schmidt (1928, 1938)	epifaunal herbivore and/or detritus-feeder
Loxonema loxonematoides (GIEBEL, 1856)	Gastropod	Röt Fm., Jena Fm., Trochitenkalk Fm., Meissner Fm.	Schmidt (1928, 1938)	epifaunal herbivore and/or detritus-feeder
Loxonema mediocalcis HOHENSTEIN, 1913	Gastropod	"Middle Muschelkalk"	Schmidt (1928, 1938)	epifaunal herbivore and/or detritus-feeder
Loxonema neptunis KITTL, 1894	Gastropod	Marmolada Lmst.	Böhm (1895)	epifaunal herbivore and/or detritus-feeder
Loxonema obsoletum (VON ZIETEN, 1830)	Gastropod	Jena Fm., Trochitenkalk Fm., Meissner Fm.	Schmidt (1928, 1938), Hagdorn & Ockert (1993)	epifaunal herbivore and/or detritus-feeder
Loxonema philippi GRUBER, 1932	Gastropod	Trochitenkalk Fm., Meissner Fm.	Schmidt (1928, 1938)	epifaunal herbivore and/or detritus-feeder
Loxonema pyrgula VON WÖHRMANN & KOKEN, 1892	Gastropod	Schlernplateau beds	Wöhrmann & Koken (1892), Friesenbichler et al. (2019b)	epifaunal herbivore and/or detritus-feeder
Loxonema rarecostatum BÖHM, 1895	Gastropod	Marmolada Lmst.	Böhm (1895)	epifaunal herbivore and/or detritus-feeder
Loxonema rectecostatum PICARD, 1903	Gastropod	Jena Fm.	Schmidt (1928, 1938)	epifaunal herbivore and/or detritus-feeder
Loxonema robustum KOKEN, 1898	Gastropod	Trochitenkalk Fm., Meissner Fm.	Schmidt (1928, 1938)	epifaunal herbivore and/or detritus-feeder
Loxonema simplex ASSMANN, 1937	Gastropod	Jena Fm.	Schmidt (1928, 1938)	epifaunal herbivore and/or detritus-feeder
Loxonema sp.	Gastropod	Marmolada Lmst.	Böhm (1895)	epifaunal herbivore and/or detritus-feeder
Loxonema sp. KOKEN, 1898	Gastropod	"Middle Muschelkalk", Jena Fm., Meissner Fm.	Schmidt (1928, 1938)	epifaunal herbivore and/or detritus-feeder
Loxonema sturi BÖHM, 1895	Gastropod	Marmolada Lmst.	Böhm (1895)	epifaunal herbivore and/or detritus-feeder
Loxonema subvariabile KITTL, 1899	Gastropod	Jena Fm., Latemar Lmst.	Schmidt (1928, 1938), Häberle (1908)	epifaunal herbivore and/or detritus-feeder
Loxonema tenue MÜNSTER, 1841	Gastropod	Trochitenkalk Fm., Meissner Fm., Marmolada Lmst.	Schmidt (1928, 1938), Böhm (1895)	epifaunal herbivore and/or detritus-feeder
Loxonema terebra (ECK)	Gastropod	Jena Fm.	Schmidt (1928, 1938)	epifaunal herbivore and/or detritus-feeder
Loxonema zekelii (GIEBEL, 1896)	Gastropod	Jena Fm.	Schmidt (1928, 1938)	epifaunal herbivore and/or detritus-feeder
Loxotomella castor BÖHM, 1895	Gastropod	Marmolada Lmst.	Böhm (1895)	epifaunal herbivore and/or detritus-feeder
Loxotomella pollux BÖHM, 1895	Gastropod	Marmolada Lmst.	Böhm (1895)	epifaunal herbivore and/or detritus-feeder
Macrochilina sp. MEISSNER, 1930	Gastropod	Meissner Fm.	Schmidt (1928, 1938)	epifaunal herbivore and/or detritus-feeder
Macrodon esinense (STOPPANI, 1860)	Bivalve	Marmolada Lmst.	Salomon (1895)	ecology unsure
Macrodon impressum (MÜNSTER, 1841)	Bivalve	Marmolada Lmst.	Salomon (1895)	ecology unsure
Macrodon nuculiformis (GEINITZ, 1842)	Bivalve	Röt Fm., Jena Fm., Trochitenkalk Fm., Meissner Fm.	Schmidt (1928, 1938)	ecology unsure
Macrodon strigilatum (MÜNSTER, 1838)	Bivalve	Schlernplateau beds, Marmolada Lmst.	Wöhrmann & Koken (1892), Salomon (1895)	ecology unsure
Macrodontella lamellosa ASSMANN, 1915	Bivalve	Jena Fm.	Schmidt (1928, 1938)	ecology unsure
Malletiidae indet.	Bivalve	Deltadalen Mb.	Foster et al. (2017a)	shallow infaunal deposit-feeder
Marmolatella cf. complanata STOPPANI, 1857	Gastropod	Marmolada Lmst.	Böhm (1895)	epifaunal herbivore and/or detritus-feeder
Marmolatella gigas (REIS, 1926)	Gastropod	Tubiphytes-Lmst. Mb.	Nützel et al. (2018)	epifaunal herbivore and/or detritus-feeder
Marmolatella ingens KITTL, 1894	Gastropod	Marmolada Lmst.	Böhm (1895)	epifaunal herbivore and/or detritus-feeder
Marmolatella iordanae NÜTZEL, KAIM & GRĂDINARU, 2018	Gastropod	Tubiphytes-Lmst. Mb.	Nützel et al. (2018)	epifaunal herbivore and/or detritus-feeder
Marmolatella picta BÖHM, 1895	Gastropod	Latemar Lmst., Marmolada Lmst.	Böhm (1895), Friesenbichler et al. (unpublished data)	epifaunal herbivore and/or detritus-feeder
Marmolatella plana KOKEN, 1898	Gastropod	Jena Fm.	Schmidt (1928, 1938)	epifaunal herbivore and/or detritus-feeder
Marmolatella planconvexa KITTL, 1894	Gastropod	Trochitenkalk Fm., Meissner Fm., Marmolada Lmst.	Schmidt (1928, 1938), Böhm (1895)	epifaunal herbivore and/or detritus-feeder
Marmolatella stomatia (STOPPANI, 1858)	Gastropod	Marmolada Lmst.	Böhm (1895)	epifaunal herbivore and/or detritus-feeder
Megalodon thuringicus TEGETMEYER, 1876	Bivalve	Erfurt Fm.	Schmidt (1928, 1938)	free-lying suspension-feeder
Megalodus sp.	Bivalve	Schlernplateau beds	Wöhrmann & Koken (1892)	ecology unsure
Mentzelia balatonica (BITTNER, 1890)	Brachiopod	Felsöörs Fm.	Vörös (2003)	pedunculate suspension-feeder
Mentzelia mentzeli (DUNKER, 1851)	Brachiopod	Felsöörs Fm., Leidapo Mb.	Szabó et al. (1979), Vörös (2003), Stiller (2001)	pedunculate suspension-feeder
Mentzelia subspherica YANG & XU, 1966	Brachiopod	Leidapo Mb.	Stiller (2001)	pedunculate suspension-feeder
Microconchid indet.	Microconchid	Viganvar, Lapis Lmst.	Foster & Sebe (2017)	cemented epifaunal suspension-feeder
Microconchus aberrans (HOHENSTEIN, 1913)	Microconchid	Jena Fm., "Middle Muschelkalk", Trochitenkalk Fm., Erfurt Fm., Daye Fm.	Urlichs (1992), Ockert (1993), Schmidt (1928, 1938), Foster et al. (2019)	cemented epifaunal suspension-feeder
Microconchus sp.	Microconchid	Luolou Fm.	Hautmann et al. (2015)	cemented epifaunal suspension-feeder
Microconchus utahensis ZATOŃ, TAYLOR & VINN, 2013	Microconchid	Virgin Fm.	Zatoń et al. (2013)	cemented epifaunal suspension-feeder
Microconchus valvatus (GOLDFUSS, 1831)	Microconchid	Jena Fm., Trochitenkalk Fm., Meissner Fm., "Middle Muschelkalk"	Zatoń et al. (2014), Schmidt (1928, 1938), Busse (1972), Hagdorn & Mundlos (1982), Hagdorn & Ockert (1993)	cemented epifaunal suspension-feeder
Microschiza arguta BÖHM, 1895	Gastropod	Marmolada Lmst.	Böhm (1895)	epifaunal herbivore and/or detritus-feeder
Miocidaris sp.	Echinoid	Virgin Fm.	Hofmann et al. (2013b)	epifaunal herbivore and/or detritus-feeder
Miocidaris? sp.	Echinoid	Tesero Oolithe	Broglio Loriga et al. (1986)	epifaunal herbivore and/or detritus-feeder
Modiola albertiana PHILIPPI, 1898	Bivalve	Meissner Fm.	Schmidt (1928, 1938)	ecology unsure
Modiola canstattensis PHILIPPI, 1898	Bivalve	Meissner Fm.	Schmidt (1928, 1938)	endobyssate suspension-feeder
Modiola cristata VON SEEBACH, 1862	Bivalve	Jena Fm., Trochitenkalk Fm., Meissner Fm.	Schmidt (1928, 1938)	endobyssate suspension-feeder
Modiola gracilis VON KLIPSTEIN, 1843	Bivalve	Schlernplateau beds	Wöhrmann & Koken (1892)	endobyssate suspension-feeder
Modiola hirudiniformis VON SCHAUROTH, 1833	Bivalve	Jena Fm., Trochitenkalk Fm., Meissner Fm.	Schmidt (1928, 1938)	endobyssate suspension-feeder
Modiola inflexa (ROEMER, 1851)	Bivalve	Trochitenkalk Fm., Meissner Fm.	Schmidt (1928, 1938), Busse (1972)	epibyssate suspension-feeder
Modiolus (Modiolus) salzstettensis (HOHENSTEIN, 1913)	Bivalve	Leidapo Mb., "Middle Muschelkalk", Trochitenkalk Fm.	Urlichs (1992), Schmidt (1928, 1938), Stiller (2001)	endobyssate suspension-feeder
Modiolus cf. triquetra (VON SEEBACH, 1862)	Bivalve	Daye Fm.	Foster et al. (2019)	endobyssate suspension-feeder
Modiolus dimidiatus (MÜNSTER, 1841)	Bivalve	Leidapo Mb.	Komatsu et al. (2004)	endobyssate suspension-feeder
Modiolus paronai (BITTNER, 1895)	Bivalve	Leidapo Mb.	Komatsu et al. (2004)	endobyssate suspension-feeder
Modiolus sp.	Bivalve	Luolou Fm.	Hautmann et al. (2015)	endobyssate suspension-feeder
Modiolus sp.	Bivalve	Virgin Fm.	Hautmann et al. (2013)	endobyssate suspension-feeder
Modiolus sp. A	Bivalve	Tubiphytes-Lmst. Mb.	Friesenbichler et al. (2019a)	endobyssate suspension-feeder
Modiolus sp. B	Bivalve	Tubiphytes-Lmst. Mb.	Friesenbichler et al. (2019a)	endobyssate suspension-feeder
Modiolus triquetrus (VON SEEBACH, 1862)	Bivalve	Röt Fm., Jena Fm., "Middle Muschelkalk", Trochitenkalk Fm., Meissner Fm.	Schmidt (1928, 1938), Busse (1972), Ockert (1993)	endobyssate suspension-feeder
Moenocrinus deeckei HILDEBRAND, 1926	Crinoid	Jena Fm.	Schmidt (1928, 1938)	erected epifaunal suspension-feeder
Moerkeia praefecta (KITTL, 1894)	Gastropod	Jena Fm., Marmolada Lmst.	Schmidt (1928, 1938), Böhm (1895)	epifaunal herbivore and/or detritus-feeder
Moerkeia rudis (KITTL, 1894)	Gastropod	Marmolada Lmst.	Böhm (1895)	epifaunal herbivore and/or detritus-feeder
Monotidae indet.	Bivalve	Tubiphytes-Lmst. Mb.	Friesenbichler et al. (2019a)	ecology unsure
Murchisonia sera BÖHM, 1895	Gastropod	Marmolada Lmst.	Böhm (1895)	epifaunal herbivore and/or detritus-feeder
Murchisonietta acuta NÜTZEL, KAIM & GRĂDINARU, 2018	Gastropod	Tubiphytes-Lmst. Mb.	Nützel et al. (2018)	epifaunal herbivore and/or detritus-feeder
Murchisoniidae n. gen. A n. sp. A	Gastropod	Leidapo Mb.	Stiller (2001)	epifaunal herbivore and/or detritus-feeder
Murchisoniidae n. gen. B n. sp. A	Gastropod	Leidapo Mb.	Stiller (2001)	epifaunal herbivore and/or detritus-feeder
Myacites sp.	Bivalve	Hidegkut Fm.	Broglio Loriga et al. (1990)	shallow to moderately deep infaunal suspension-feeder
Myalina blezingeri PHILIPPI, 1899	Bivalve	Trochitenkalk Fm., Meissner Fm.	Schmidt (1928, 1938), Busse (1972), Hagdorn & Mundlos (1982), Hagdorn & Ockert (1993)	epibyssate suspension-feeder
Myalina sp.	Bivalve	Csopak Marl	Broglio Loriga et al. (1990)	epibyssate suspension-feeder
Myalina vetusta BITTNER, 1899	Bivalve	Hidegkut Fm.	Broglio Loriga et al. (1990)	epibyssate suspension-feeder
Myalina? tommasii SALOMON, 1895	Bivalve	Marmolada Lmst.	Salomon (1895)	epibyssate suspension-feeder
Myalinella newelli HAUTMANN, BUCHER, BRÜHWILER, GOUDEMAND, KAIM & NÜTZEL, 2011	Bivalve	Luolou Fm., Daye Fm.	Hautmann et al. (2015), Foster et al. (2019)	epibyssate suspension-feeder
Myalinella postcarbonica (GIRTY, 1927)	Bivalve	Dinwoody Fm., Daye Fm.	Hofmann et al. (2013a), Foster et al. (2019)	epibyssate suspension-feeder
Myalinella sp.	Bivalve	Virgin Fm.	Hofmann et al. (2013b)	epibyssate suspension-feeder
Myoconcha (Pseudomyoconcha)? sp.	Bivalve	Felsöörs Fm.	Vörös (2003)	ecology unsure
Myoconcha bicostata ASSMANN, 1915	Bivalve	Jena Fm.	Schmidt (1928, 1938)	endobyssate suspension-feeder
Myoconcha brunneri VON HAUER, 1857	Bivalve	Marmolada Lmst.	Salomon (1895)	endobyssate suspension-feeder
Myoconcha cf. plana KIPARISOVA, 1938	Bivalve	Virgin Fm.	Hautmann et al. (2013)	endobyssate suspension-feeder
Myoconcha grandis WAGNER. 1897	Bivalve	Jena Fm.	Wagner (1897)	endobyssate suspension-feeder
Myoconcha laevis PHILIPPI, 1898	Bivalve	Meissner Fm.	Schmidt (1928, 1938)	endobyssate suspension-feeder
Myoconcha parvula VON WÖHRMANN & KOKEN, 1892	Bivalve	Schlernplateau beds	Wöhrmann & Koken (1892), Friesenbichler et al. (2019b)	endobyssate suspension-feeder
Myoconcha roemeri ECK, 1872	Bivalve	Röt Fm., Jena Fm.	Schmidt (1928, 1938)	endobyssate suspension-feeder
Myoconcha sp.	Bivalve	Lazurnaya Bay Fm.	Shigeta et al. (2009)	endobyssate suspension-feeder
Myoconcha sp.	Bivalve	Tubiphytes-Lmst. Mb.	Friesenbichler et al. (2019a)	ecology unsure
Myophoria cardissoides VON ALBERTI, 1864	Bivalve	Röt Fm., Jena Fm., "Middle Muschelkalk", Trochitenkalk Fm., Meissner Fm.	Schmid (1938)	shallow to moderately deep infaunal suspension-feeder
Myophoria cf. proharpa FRECH, 1904	Bivalve	Felsöörs Fm.	Vörös (2003)	shallow to moderately deep infaunal suspension-feeder
Myophoria curvirostris (VON SCHLOTHEIM, 1820)	Bivalve	Jena Fm., Trochitenkalk Fm., Meissner Fm.	Schmidt (1928, 1938)	shallow to moderately deep infaunal suspension-feeder
Myophoria exigua BERGER, 1860	Bivalve	Jena Fm.	Schmidt (1928, 1938)	shallow to moderately deep infaunal suspension-feeder
Myophoria fallax VON SEEBACH, 1833	Bivalve	Hidegkut Fm., Röt Fm.	Wagner (1897), Bittner (1901)	shallow to moderately deep infaunal suspension-feeder
Myophoria goldfussi VON ALBERTI in ZIETEN, 1830	Bivalve	Trochitenkalk Fm., Meissner Fm., Erfurt Fm.	Schmidt (1928, 1938)	shallow to moderately deep infaunal suspension-feeder
Myophoria incurvata VON SEEBACH, 1867	Bivalve	Jena Fm.	Schmidt (1928, 1938)	shallow to moderately deep infaunal suspension-feeder
Myophoria intermedia VON SCHAUROTH, 1857	Bivalve	Jena Fm., "Middle Muschelkalk", Trochitenkalk Fm., Meissner Fm., Erfurt Fm.	Schmidt (1928, 1938)	shallow to moderately deep infaunal suspension-feeder
Myophoria kefersteini (MÜNSTER in GOLDFUSS, 1833)	Bivalve	"Middle Muschelkalk", Schlernplateau beds	Wöhmann & Koken (1892), Friesenbichler et al. (2019b), Schmidt (1928, 1938)	shallow to moderately deep infaunal suspension-feeder
Myophoria laevigata VON ALBERTI, 1834	Bivalve	Röt Fm., Jena Fm., "Middle Muschelkalk", Trochitenkalk Fm., Marmolada Lmst., Meissner Fm., Erfurt Fm.	Schmidt (1928, 1938), Busse (1972), Hagdorn & Ockert (1993), Salomon (1895), Ockert (1993), Urlichs (1992)	shallow to moderately deep infaunal suspension-feeder
Myophoria pesanseris (VON SCHLOTHEIM, 1820)	Bivalve	Trochitenkalk Fm., Meissner Fm., Erfurt Fm.	Schmidt (1928, 1938)	shallow to moderately deep infaunal suspension-feeder
Myophoria rotunda VON ALBERTI, 1864	Bivalve	Jena Fm., Meissner Fm.	Schmidt (1928, 1938)	shallow to moderately deep infaunal suspension-feeder
Myophoria schmidti WEIGELIN, 1913	Bivalve	Trochitenkalk Fm., Meissner Fm.	Schmidt (1928, 1938)	shallow to moderately deep infaunal suspension-feeder
Myophoria simplex (VON SCHLOTHEIM, 1820)	Bivalve	Röt Fm., Jena Fm., Trochitenkalk Fm., Meissner Fm., Erfurt Fm.	Schmidt (1928, 1938)	shallow to moderately deep infaunal suspension-feeder
Myophoria struckmanni VON STROMBECK, 1858	Bivalve	Jena Fm., "Middle Muschelkalk", Trochitenkalk Fm., Meissner Fm., Erfurt Fm.	Schmidt (1928, 1938)	shallow to moderately deep infaunal suspension-feeder
Myophoria transversa (BORNEMANN, 1856)	Bivalve	Röt Fm., Jena Fm., "Middle Muschelkalk", Trochitenkalk Fm., Meissner Fm., Erfurt Fm.	Schmidt (1928, 1938), Urlichs (1992)	shallow to moderately deep infaunal suspension-feeder
Myophoria vulgaris (VON SCHLOTHEIM, 1820)	Bivalve	Röt Fm., Jena Fm., "Middle Muschelkalk", Trochitenkalk Fm., Meissner Fm., Erfurt Fm.	Schmidt (1928, 1938), Hagdorn & Ockert (1993), Busse (1972), Ockert (1993)	shallow to moderately deep infaunal suspension-feeder
Myophoria whateleyae (BUCH, 1845)	Bivalve	Schlernplateau beds	Wöhrmann & Koken (1892)	shallow to moderately deep infaunal suspension-feeder
Myophoria? n. sp. indet.	Bivalve	Marmolada Lmst.	Salomon (1895)	ecology unsure
Myophoria? plana VON WÖHRMANN & KOKEN, 1892	Bivalve	Schlernplateau beds	Wöhrmann & Koken (1892)	shallow to moderately deep infaunal suspension-feeder
Myophoricardium lineatum VON WÖHRMANN, 1889	Bivalve	Leidapo Mb.	Komatsu et al. (2004)	shallow to moderately deep infaunal suspension-feeder
Myophoriopis incrassata (MÜNSTER, 1841)	Bivalve	Jena Fm., "Middle Muschelkalk", Trochitenkalk Fm., Meissner Fm., Erfurt Fm.	Schmidt (1928, 1938)	shallow to moderately deep infaunal suspension-feeder
Myophoriopis perlonga Grupe, 1907	Bivalve	Trochitenkalk Fm., Meissner Fm., Erfurt Fm.	Schmidt (1928, 1938)	shallow to moderately deep infaunal suspension-feeder
Myophoriopis richthofeni (STUR, 1868)	Bivalve	Schlernplateau beds	Wöhmann & Koken (1892), Friesenbichler et al. (2019b)	shallow to moderately deep infaunal suspension-feeder
Myophoriopis subundata (VON SCHAUROTH, 1855)	Bivalve	Röt Fm., Erfurt Fm.	Schmidt (1928, 1938)	shallow to moderately deep infaunal suspension-feeder
Mysidiella? sp.	Bivalve	Felsöörs Fm.	Vörös (2003)	epibyssate suspension-feeder
Mysidioptera (Mysidioptera) cf. cassiana BITTNER, 1895	Bivalve	Leidapo Mb.	Stiller (2001)	epibyssate suspension-feeder
Mysidioptera (Mysidioptera) cf. tenella BITTNER, 1895	Bivalve	Leidapo Mb.	Stiller (2001)	epibyssate suspension-feeder
Mysidioptera (Mysidioptera) punctata CHEN, MA & ZHANG, 1974	Bivalve	Leidapo Mb.	Stiller (2001)	epibyssate suspension-feeder
Mysidioptera aff. vixcostata (STOPPANI, 1860)	Bivalve	Leidapo Mb.	Komatsu et al. (2004)	epibyssate suspension-feeder
Mysidioptera cainalloi (STOPPANI, 1860)	Bivalve	Latemar Lmst.	Friesenbichler et al. (unpublished data)	epibyssate suspension-feeder
Mysidioptera cf. philippi WILCKENS, 1909	Bivalve	Latemar Lmst.	Friesenbichler et al. (unpublished data)	epibyssate suspension-feeder
Mysidioptera fornicata BITTNER, 1895	Bivalve	Tubiphytes-Lmst. Mb., Leidapo Mb.	Friesenbichler et al. (2019a), Komatsu et al. (2004)	epibyssate suspension-feeder
Mysidioptera incurvostriata (GÜMBEL, 1861)	Bivalve	Schlernplateau beds	Wöhrmann & Koken (1892), Friesenbichler et al. (2019b)	epibyssate suspension-feeder
Mysidioptera ornata SALOMON, 1895	Bivalve	Latemar Lmst., Marmolada Lmst.	Friesenbichler et al. (unpublished data), Salomon (1895)	epibyssate suspension-feeder
Mysidioptera philippi WILCKENS, 1909	Bivalve	Latemar Lmst.	Friesenbichler et al. (unpublished data)	epibyssate suspension-feeder
Mysidioptera sp.	Bivalve	Tubiphytes-Lmst. Mb.	Friesenbichler et al. (2019a)	epibyssate suspension-feeder
Mysidioptera sp.	Bivalve	Latemar Lmst.	Friesenbichler et al. (unpublished data)	epibyssate suspension-feeder
Mysidioptera woehrmanni SALOMON, 1895	Bivalve	Marmolada Lmst., Latemar Lmst.	Salomon (1895), Friesenbichler et al. (unpublished data)	epibyssate suspension-feeder
Mysidioptera? sp.	Bivalve	Felsöörs Fm.	Vörös (2003)	epibyssate suspension-feeder
Mytiliconcha cf. orobica TOMMASI, 1911	Bivalve	Tubiphytes-Lmst. Mb.	Friesenbichler et al. (2019a)	ecology unsure
Mytilus eduliformis praecursor (FRECH, 1904)	Bivalve	Röt Fm., Leidapo Mb.	Schmidt (1928, 1938), Busse (1972), Hagdorn & Mundlos (1982), Urlichs (1992), Komatsu et al. (2004)	epibyssate suspension-feeder
Mytilus eduliformis VON SCHLOTHEIM, 1820	Bivalve	Jena Fm., "Middle Muschelkalk", Trochitenkalk Fm., Meissner Fm.	Schmidt (1928, 1938), Busse (1972), Haddorn & Mundlos (1982)	epibyssate suspension-feeder
Mytilus gibbus (VON ALBERTI, 1864)	Bivalve	Jena Fm., "Middle Muschelkalk", Trochitenkalk Fm., Meissner Fm., Erfurt Fm.	Schmidt (1928, 1938)	epibyssate suspension-feeder
Mytilus muensteri VON KLIPSTEIN, 1843	Bivalve	Schlernplateau beds	Wöhrmann & Koken (1892)	epibyssate suspension-feeder
Mytilus priscus (GOLDFUSS, 1841)	Bivalve	Erfurt Fm.	Schmidt (1928, 1938)	epibyssate suspension-feeder
Mytilus subdimidiatus (SANDBERGER, 1868)	Bivalve	Erfurt Fm.	Schmidt (1928, 1938)	epibyssate suspension-feeder
Natica cf. Hypsipleura cathedralis KOKEN	Gastropod	Jena Fm.	Wagner (1897)	epifaunal herbivore and/or detritus-feeder
Natica cf. Katosira fragilis KOKEN, 1892	Gastropod	Jena Fm.	Wagner (1897)	epifaunal herbivore and/or detritus-feeder
Natica cf. Zygopleura arctecostata (MÜNSTER, 1841)	Gastropod	Jena Fm.	Wagner (1897)	epifaunal herbivore and/or detritus-feeder
Natica cf. Zygopleura spinosa KOKEN	Gastropod	Jena Fm.	Wagner (1897)	epifaunal herbivore and/or detritus-feeder
Natica costata BERGER	Gastropod	Jena Fm.	Wagner (1897)	epifaunal herbivore and/or detritus-feeder
Natica n. sp.	Gastropod	Schlernplateau beds	Friesenbichler et al. (2019b)	epifaunal herbivore and/or detritus-feeder
Naticella acutecostata (VON KLIPSTEIN, 1843)	Gastropod	Latemar Lmst., Marmolada Lmst.	Böhm (1895), Häberle (1908)	epifaunal herbivore and/or detritus-feeder
Naticella bergeri PICARD, 1903	Gastropod	Jena Fm.	Schmidt (1928, 1938)	epifaunal herbivore and/or detritus-feeder
Naticella boehmi HÄBERLE, 1908	Gastropod	Latemar Lmst.	Friesenbichler et al. (unpublished data)	epifaunal herbivore and/or detritus-feeder
Naticella langi HOHENSTEIN, 1913	Gastropod	"Middle Muschelkalk"	Schmidt (1928, 1938)	epifaunal herbivore and/or detritus-feeder
Naticella spitzi GRUBER, 1932	Gastropod	Trochitenkalk Fm., Meissner Fm.	Schmidt (1928, 1938), Busse (1972)	epifaunal herbivore and/or detritus-feeder
Naticella tenuicostata PICARD, 1903	Gastropod	Jena Fm.	Schmidt (1928, 1938)	epifaunal herbivore and/or detritus-feeder
Naticella triadica (KITTL, 1894)	Gastropod	Trochitenkalk Fm., Meissner Fm., Marmolada Lmst.	Schmidt (1928, 1938), Hagdorn & Ockert (1993), Böhm (1895)	epifaunal herbivore and/or detritus-feeder
Naticopsis (Marmolatella) applanata KITTL, 1895	Gastropod	Marmolada Lmst., Leidapo Mb.	Böhm (1895), Stiller (2001), Yin & Yolchelson (1983)	epifaunal herbivore and/or detritus-feeder
Naticopsis (Marmolatella) cf. plana KOKEN, 1898	Gastropod	Leidapo Mb.	Stiller (2001)	epifaunal herbivore and/or detritus-feeder
Naticopsis (Marmolatella) sp. A sensu YIN & YOLCHELSON, 1983	Gastropod	Leidapo Mb.	Stiller (2001), Yin & Yochelson (1986)	epifaunal herbivore and/or detritus-feeder
Naticopsis (Naticopsis) ladina KITTL, 1892	Gastropod	Schlernplateau beds, Leidapo Mb.	Friesenbichler et al. (2019b), Stiller (2001)	epifaunal herbivore and/or detritus-feeder
Naticopsis (Naticopsis) n. sp. A	Gastropod	Leidapo Mb.	Stiller (2001)	epifaunal herbivore and/or detritus-feeder
Naticopsis (Naticopsis) n. sp. B	Gastropod	Leidapo Mb.	Stiller (2001)	epifaunal herbivore and/or detritus-feeder
Naticopsis (Naticopsis) signata KOKEN, 1900	Gastropod	Leidapo Mb.	Stiller (2001), Yin & Yochelson (1983b)	epifaunal herbivore and/or detritus-feeder
Naticopsis (Naticopsis) utahensis BATTEN & STOKES, 1986	Gastropod	Sinbad Fm., Virgin Fm.	Batten & Stokes (1986), McGowan et al. (2009)	epifaunal herbivore and/or detritus-feeder
Naticopsis cf. arctica SPATH, 1930	Gastropod	Campil Mb.	Broglio Loriga et al. (1990)	epifaunal herbivore and/or detritus-feeder
Naticopsis illita (QUENSTEDT)	Gastropod	"Middle Muschelkalk", Trochitenkalk Fm., Meissner Fm.	Schmidt (1928, 1938)	epifaunal herbivore and/or detritus-feeder
Naticopsis mediocalcis HOHENSTEIN, 1913	Gastropod	"Middle Muschelkalk"	Schmidt (1928, 1938)	epifaunal herbivore and/or detritus-feeder
Naticopsis sp.	Gastropod	Luolou Fm.	Hautmann et al. (2015)	epifaunal herbivore and/or detritus-feeder
Naticopsis sp.	Gastropod	Tubiphytes-Lmst. Mb.	Nützel et al. (2018)	epifaunal herbivore and/or detritus-feeder
Naticopsis sp.	Gastropod	Daye Fm.	Foster et al. (2019)	epifaunal herbivore and/or detritus-feeder
Naticopsis? sp.	Gastropod	Jena Fm.	Schmidt (1928, 1938)	epifaunal herbivore and/or detritus-feeder
Natiria aequicostata BATTEN & STOKES, 1986	Gastropod	Sinbad Fm.	Batten & Stokes (1986)	epifaunal herbivore and/or detritus-feeder
Natiria cf. costata (MÜNSTER, 1841)	Gastropod	Virgin Fm.	Hofmann et al. (2013b)	epifaunal herbivore and/or detritus-feeder
Natiria costata (MÜNSTER, 1841)	Gastropod	Val Badia Mb., Cencenighe Mb., San Lucano Mb., Csopak Marl, Sinbad Fm., Szin Marl Fm.	Budai (2008), Foster et al. (2015, 2017b), Broglio Loriga et al. (1990), Hofmann et al. (2014), Neri & Posenato (1985)	epifaunal herbivore and/or detritus-feeder
Natiria striatocostata (BRAUN in MÜNSTER, 1841)	Gastropod	Sinbad Fm., Leidapo Mb., Trochitenkalk Fm., Marmolada Lmst., Meissner Fm.	Böhm (1895), Stiller (2001), Yin & Yolchelson (1983), Batten & Stokes (1986), Schmidt (1928, 1938)	epifaunal herbivore and/or detritus-feeder
Natiria subtilistriata FRECH	Gastropod	Csopak Marl	Broglio Loriga et al. (1990)	epifaunal herbivore and/or detritus-feeder
Neocyrtina mixodeltidiumosa YANG & XU, 1966	Brachiopod	Leidapo Mb.	Stiller (2001)	cemented epifaunal suspension-feeder
Neomorphotis comta (GOLDFUSS 1833 in GOLDFUSS 1833-1841)	Bivalve	Tubiphytes-Lmst. Mb., Jena Fm., Trochitenkalk Fm., Meissner Fm.	Friesenbichler et al. (2019a), Schmidt (1928, 1938)	epibyssate suspension-feeder
Neoretzia wachangpoensis STILLER, 1999	Brachiopod	Leidapo Mb.	Stiller (2001)	pedunculate suspension-feeder
Neoschizodus cf. laevigatus (GOLDFUSS in VON ZIETEN, 1830)	Bivalve	Hidegkut Fm.	Broglio Loriga et al. (1990)	shallow to moderately deep infaunal suspension-feeder
Neoschizodus cf. laevigatus (GOLDFUSS in VON ZIETEN, 1830)	Bivalve	Lazurnaya Bay Fm., Zhitkov Fm.	Shigeta et al. (2009)	shallow to moderately deep infaunal suspension-feeder
Neoschizodus cf. laevigatus (GOLDFUSS in VON ZIETEN, 1830)	Bivalve	San Lucano Mb.	Neri & Posenato (1985)	shallow to moderately deep infaunal suspension-feeder
Neoschizodus cf. ovatus (GOLDFUSS, 1838)	Bivalve	Zhitkov Fm.	Shigeta et al. (2009)	shallow to moderately deep infaunal suspension-feeder
Neoschizodus elongatus BOYD & NEWELL, 1997	Bivalve	Seis Mb.	Hofmann et al. (2015)	shallow to moderately deep infaunal suspension-feeder
Neoschizodus germanicus (HOHENSTEIN, 1913)	Bivalve	"Middle Muschelkalk", Trochitenkalk Fm., Meissner Fm.	Schmidt (1928, 1938), Busse (1972), Ockert (1993)	shallow to moderately deep infaunal suspension-feeder
Neoschizodus laevigatus (GOLDFUSS in VON ZIETEN, 1830)	Bivalve	Deltadalen Mb., Mazzin Mb., Luolou Fm., Bodvaszilas Sandst. Fm., Dinwoody Fm., Seis Mb., Gastropod Oolith, Campil Mb., Sinbad Fm., Val Badia Mb., Cencenighe Mb., Virgin Fm., Csopak Marl, Leidapo Mb., Daye Fm., Andraz Horizon	Foster et al. (2015, 2019), Broglio Loriga et al. (1990), Budai (2008), Hofmann et al. (2013a, b, 2014, 2015), Foster et al. (2017a, b), Hautmann et al. (2013), Stiller (2001)	shallow to moderately deep infaunal suspension-feeder
Neoschizodus orbicularis (BRONN, 1837)	Bivalve	Mazzin Mb., Seis Mb., Jena Fm., "Middle Muschelkalk", Trochitenkalk Fm., Meissner Fm., Erfurt Fm.	Schmidt (1928, 1938), Hofmann et al. (2015)	shallow to moderately deep infaunal suspension-feeder
Neoschizodus ovatus (GOLDFUSS, 1838)	Bivalve	Campil Mb., Val Badia Mb., Cencenighe Mb., San Lucano Mb., Csopak Marl, Röt Fm., Jena Fm., Trochitenkalk Fm., Meissner Fm., Erfurt Fm.	Schmidt (1928, 1938), Busse (1972), Hagdorn & Ockert (1993), Broglio Loriga et al. (1990), Budai (2008), Neri & Posenato (1985), Foster et al. (2017b)	shallow to moderately deep infaunal suspension-feeder
Neoschizodus praeorbicularis (BITTNER, 1901)	Bivalve	Campil Mb., Hidegkut Fm., Virgin Fm., Csopak Marl	Broglio Loriga et al. (1990), Hautmann et al. (2013), Bittner (1901),	shallow to moderately deep infaunal suspension-feeder
Neoschizodus sp.	Bivalve	Viganvar, Lapis Lmst., Zuhanya Lmst.	Foster & Sebe (2017)	shallow to moderately deep infaunal suspension-feeder
Neritaria aequicrescens KOKEN, 1898	Gastropod	Trochitenkalk Fm., Meissner Fm.	Schmidt (1928, 1938)	epifaunal herbivore and/or detritus-feeder
Neritaria aff. venusta BÖHM, 1895	Gastropod	Meissner Fm., Trochitenkalk Fm.	Schmidt (1928, 1938)	epifaunal herbivore and/or detritus-feeder
Neritaria calculus (KITTL, 1894)	Gastropod	Marmolada Lmst.	Böhm (1895)	epifaunal herbivore and/or detritus-feeder
Neritaria candida KITTL, 1894	Gastropod	Marmolada Lmst., Erfurt Fm.	Schmidt (1928, 1938), Böhm (1895)	epifaunal herbivore and/or detritus-feeder
Neritaria cassiana (WISSMANN, 1841)	Gastropod	Schlernplateau beds	Blaschke (1905)	epifaunal herbivore and/or detritus-feeder
Neritaria cf. cognata (GIEBEL, 1856)	Gastropod	Trochitenkalk Fm.	Ockert (1993)	epifaunal herbivore and/or detritus-feeder
Neritaria cf. mandelslohi (VON KLIPSTEIN, 1843)	Gastropod	"Middle Muschelkalk", Trochitenkalk Fm., Meissner Fm.	Schmidt (1928, 1938), Ockert (1993), Busse (1972)	epifaunal herbivore and/or detritus-feeder
Neritaria cicer BÖHM, 1895	Gastropod	Marmolada Lmst.	Böhm (1895)	epifaunal herbivore and/or detritus-feeder
Neritaria cognata (GIEBEL, 1856)	Gastropod	Jena Fm.	Schmidt (1928, 1938)	epifaunal herbivore and/or detritus-feeder
Neritaria comensis (HÖRNES, 1856)	Gastropod	Latemar Lmst., Marmolada Lmst.	Häberle (1908), Böhm (1895)	epifaunal herbivore and/or detritus-feeder
Neritaria conomorpha (KITTL, 1894)	Gastropod	Marmolada Lmst.	Böhm (1895)	epifaunal herbivore and/or detritus-feeder
Neritaria costata BATTEN & STOKES, 1986	Gastropod	Sinbad Fm.	Batten & Stokes (1986), Hofmann et al. (2014)	epifaunal herbivore and/or detritus-feeder
Neritaria depressa PICARD, 1903	Gastropod	Jena Fm.	Schmidt (1928, 1938)	epifaunal herbivore and/or detritus-feeder
Neritaria dunkeri (VON SCHAUROTH, 1857)	Gastropod	Trochitenkalk Fm., Meissner Fm.	Schmidt (1928, 1938)	epifaunal herbivore and/or detritus-feeder
Neritaria incisa (KITTL, 1894)	Gastropod	Marmolada Lmst.	Böhm (1895)	epifaunal herbivore and/or detritus-feeder
Neritaria ingrandita (KITTL, 1894)	Gastropod	Latemar Lmst., Marmolada Lmst.	Böhm (1895), Friesenbichler et al. (unpublished data)	epifaunal herbivore and/or detritus-feeder
Neritaria involuta KOKEN, 1898	Gastropod	Jena Fm.	Schmidt (1928, 1938)	epifaunal herbivore and/or detritus-feeder
Neritaria magna PICARD, 1903	Gastropod	Jena Fm.	Schmidt (1928, 1938)	epifaunal herbivore and/or detritus-feeder
Neritaria mandelslohi (VON KLIPSTEIN, 1843)	Gastropod	Schlernplateau beds, Latemar Lmst., Marmolada Lmst., Jena Fm., "Middle Muschelkalk", Trochitenkalk Fm., Meissner Fm.	Blaschke (1905), Böhm (1895), Häberle (1908), Schmidt (1928, 1938)	epifaunal herbivore and/or detritus-feeder
Neritaria matercula QUENSTEDT	Gastropod	Meissner Fm.	Schmidt (1928, 1938), Busse (1972)	epifaunal herbivore and/or detritus-feeder
Neritaria n. sp. A	Gastropod	Leidapo Mb.	Stiller (2001)	epifaunal herbivore and/or detritus-feeder
Neritaria n. sp. B	Gastropod	Leidapo Mb.	Stiller (2001)	epifaunal herbivore and/or detritus-feeder
Neritaria oolithica VON SEEBACH	Gastropod	Jena Fm., Trochitenkalk Fm., Meissner Fm.	Schmidt (1928, 1938)	epifaunal herbivore and/or detritus-feeder
Neritaria otomorpha (KITTL, 1894)	Gastropod	Marmolada Lmst.	Böhm (1895)	epifaunal herbivore and/or detritus-feeder
Neritaria papilio (STOPPANI, 1857)	Gastropod	Erfurt Fm.	Schmidt (1928, 1938)	epifaunal herbivore and/or detritus-feeder
Neritaria plicatilis (VON KLIPSTEIN, 1843)	Gastropod	Schlernplateau beds	Wöhrmann & Koken (1892), Blaschke (1905), Friesenbichler et al. (2019b)	epifaunal herbivore and/or detritus-feeder
Neritaria prior PICARD, 1903	Gastropod	Jena Fm.	Schmidt (1928, 1938)	epifaunal herbivore and/or detritus-feeder
Neritaria sphaeroidica PICARD, 1903	Gastropod	Jena Fm.	Schmidt (1928, 1938)	epifaunal herbivore and/or detritus-feeder
Neritaria subincisa (KITTL, 1894)	Gastropod	Latemar Lmst.	Häberle (1908)	epifaunal herbivore and/or detritus-feeder
Neritaria subneritina BÖHM, 1895	Gastropod	Marmolada Lmst.	Böhm (1895)	epifaunal herbivore and/or detritus-feeder
Neritaria venusta BÖHM, 1895	Gastropod	Latemar Lmst., Marmolada Lmst.	Böhm (1895), Schmidt (1928, 1938), Friesenbichler et al. (unpublished data)	epifaunal herbivore and/or detritus-feeder
Neritopsis armata MÜNSTER, 1841	Gastropod	Marmolada Lmst., Schlernplateau beds	Böhm (1895), Wöhrmann & Koken (1892)	epifaunal herbivore and/or detritus-feeder
Neritopsis bicarinata KITTL, 1894	Gastropod	Marmolada Lmst.	Böhm (1895)	epifaunal herbivore and/or detritus-feeder
Neritopsis cf. decussata (MÜNSTER, 1841)	Gastropod	Trochitenkalk Fm., Meissner Fm.	Schmidt (1928, 1938)	epifaunal herbivore and/or detritus-feeder
Neritopsis decussata (MÜNSTER, 1841)	Gastropod	Schlernplateau beds	Wöhrmann & Koken (1892), Friesenbichler et al. (2019b)	epifaunal herbivore and/or detritus-feeder
Neritopsis naumanni PICARD, 1909	Gastropod	Jena Fm.	Schmidt (1928, 1938)	epifaunal herbivore and/or detritus-feeder
Newaagia multicostata YIN, 1974	Bivalve	Leidapo Mb.	Stiller (2001)	cemented epifaunal suspension-feeder
Newaagia n. sp.	Bivalve	Leidapo Mb.	Stiller (2001)	cemented epifaunal suspension-feeder
Newaagia noetlingi FRECH, 1909	Bivalve	Jena Fm., Trochitenkalk Fm., Meissner Fm.	Schmidt (1928, 1938), Busse (1972), Hagdorn & Mundlos (1982), Hagdorn & Ockert (1993), Hautmann & Hagdorn (2013)	cemented epifaunal suspension-feeder
Newaagia sessilis (KOKEN, 1900)	Bivalve	Leidapo Mb.	Stiller (2001)	cemented epifaunal suspension-feeder
Newaagia? sp.	Bivalve	Felsöörs Fm.	Vörös (2003)	cemented epifaunal suspension-feeder
Norella? sp.	Brachiopod	Felsöörs Fm.	Vörös (2003)	pedunculate suspension-feeder
Nucinella nakremi FOSTER, DANISE, TWITCHETT, 2017	Bivalve	Deltadalen Mb.	Foster et al. (2017a)	ecology unsure
Nucinella taylori FOSTER, DANISE, TWITCHETT, 2017	Bivalve	Deltadalen Mb.	Foster et al. (2017a)	ecology unsure
Nucula oviformis ECK, 1865	Bivalve	Jena Fm.	Schmidt (1928, 1938)	shallow infaunal deposit-feeder
Nucula speciosa MÜNSTER, 1863	Bivalve	Erfurt Fm.	Schmidt (1928, 1938)	shallow infaunal deposit-feeder
Nudirostralina subtrinodosi YANG & XU, 1966	Brachiopod	Leidapo Mb.	Stiller (2001)	pedunculate suspension-feeder
Nudispiriferina minima YANG & XU, 1966	Brachiopod	Leidapo Mb.	Stiller (2001)	pedunculate suspension-feeder
Ochotomya? sp.	Bivalve	Lazurnaya Bay Fm.	Shigeta et al. (2009)	ecology unsure
Ombonia cf. canevai MERLA, 1930	Brachiopod	Tesero Oolithe	Broglio Loriga et al. (1986)	pedunculate suspension-feeder
Ombonia sp.	Brachiopod	Tesero Oolithe	Broglio Loriga et al. (1986)	pedunculate suspension-feeder
Omphaloptycha (Coelostylina [Gradiella]) fedaiana (KITTL 1894)	Gastropod	Latemar Lmst.	Häberle (1908)	epifaunal herbivore and/or detritus-feeder
Omphaloptycha (Coelostylina) cf. medea (KITTL, 1894)	Gastropod	Latemar Lmst.	Häberle (1908)	epifaunal herbivore and/or detritus-feeder
Omphaloptycha (Coelostylina) conica (MÜNSTER, 1841)	Gastropod	Latemar Lmst.	Häberle (1908)	epifaunal herbivore and/or detritus-feeder
Omphaloptycha (Coelostylina) emiliae HÄBERLE, 1908	Gastropod	Latemar Lmst.	Häberle (1908)	epifaunal herbivore and/or detritus-feeder
Omphaloptycha (Coelostylina) platystoma HÄBERLE, 1908	Gastropod	Latemar Lmst.	Häberle (1908)	epifaunal herbivore and/or detritus-feeder
Omphaloptycha (Coelostylina) sp.	Gastropod	Latemar Lmst.	Häberle (1908)	epifaunal herbivore and/or detritus-feeder
Omphaloptycha abnobae HOHENSTEIN, 1913	Gastropod	"Middle Muschelkalk"	Schmidt (1928, 1938)	epifaunal herbivore and/or detritus-feeder
Omphaloptycha alta (GIEBEL, 1856)	Gastropod	Jena Fm., Trochitenkalk Fm., Meissner Fm.	Schmidt (1928, 1938)	epifaunal herbivore and/or detritus-feeder
Omphaloptycha bacchus (KITTL, 1894)	Gastropod	Marmolada Lmst.	Böhm (1895)	epifaunal herbivore and/or detritus-feeder
Omphaloptycha cf. aequalis (STOPPANI, 1857)	Gastropod	Latemar Lmst.	Häberle (1908)	epifaunal herbivore and/or detritus-feeder
Omphaloptycha cf. rhenana (KOKEN, 1898)	Gastropod	Jena Fm.	Schmidt (1928, 1938)	epifaunal herbivore and/or detritus-feeder
Omphaloptycha cf. strombecki (DUNKER, 1851)	Gastropod	"Middle Muschelkalk"	Schmidt (1928, 1938)	epifaunal herbivore and/or detritus-feeder
Omphaloptycha cf. waageni (KITTL, 1894)	Gastropod	"Middle Muschelkalk"	Schmidt (1928, 1938)	epifaunal herbivore and/or detritus-feeder
Omphaloptycha convertens BÖHM, 1895	Gastropod	Marmolada Lmst.	Böhm (1895)	epifaunal herbivore and/or detritus-feeder
Omphaloptycha ecki HOHENSTEIN, 1913	Gastropod	"Middle Muschelkalk"	Schmidt (1928, 1938)	epifaunal herbivore and/or detritus-feeder
Omphaloptycha fusiformis KOKEN, 1898	Gastropod	Trochitenkalk Fm., Meissner Fm.	Schmidt (1928, 1938)	epifaunal herbivore and/or detritus-feeder
Omphaloptycha gracillima KOKEN, 1898	Gastropod	"Middle Muschelkalk"	Schmidt (1928, 1938)	epifaunal herbivore and/or detritus-feeder
Omphaloptycha gregaria (VON SCHLOTHEIM, 1822)	Gastropod	Leidapo Mb., Jena Fm., Trochitenkalk Fm., Meissner Fm., Gastropod Oolithe	Broglio Lorigo et al. (1990), Schmidt (1928, 1938), Ockert (1993), Stiller (2001)	epifaunal herbivore and/or detritus-feeder
Omphaloptycha hormolira BATTEN & STOKES, 1986	Gastropod	Lazurnaya Bay Fm., Zhitkov Fm., Sinbad Fm.	Shigeta et al. (2009), Batten & Stokes (1986)	epifaunal herbivore and/or detritus-feeder
Omphaloptycha inconstans (KITTL, 1894)	Gastropod	Marmolada Lmst.	Böhm (1895)	epifaunal herbivore and/or detritus-feeder
Omphaloptycha irritata (KITTL, 1894)	Gastropod	Latemar Lmst., Marmolada Lmst.	Böhm (1895), Friesenbichler et al. (unpublished data)	epifaunal herbivore and/or detritus-feeder
Omphaloptycha kepleri HOHENSTEIN, 1913	Gastropod	"Middle Muschelkalk"	Schmidt (1928, 1938)	epifaunal herbivore and/or detritus-feeder
Omphaloptycha kneri (GIEBEL, 1856)	Gastropod	Jena Fm., Trochitenkalk Fm., Meissner Fm.	Schmidt (1928, 1938)	epifaunal herbivore and/or detritus-feeder
Omphaloptycha koenigi GRUBER, 1933	Gastropod	Trochitenkalk Fm., Meissner Fm.	Schmidt (1928, 1938)	epifaunal herbivore and/or detritus-feeder
Omphaloptycha kokeni (KITTL, 1894)	Gastropod	Marmolada Lmst.	Böhm (1895)	epifaunal herbivore and/or detritus-feeder
Omphaloptycha lincta BÖHM, 1895	Gastropod	Marmolada Lmst.	Böhm (1895)	epifaunal herbivore and/or detritus-feeder
Omphaloptycha muensteri BÖHM, 1895	Gastropod	Marmolada Lmst.	Böhm (1895)	epifaunal herbivore and/or detritus-feeder
Omphaloptycha n. sp.	Gastropod	Leidapo Mb.	Stiller (2001)	epifaunal herbivore and/or detritus-feeder
Omphaloptycha porrecta BÖHM, 1895	Gastropod	Jena Fm., Marmolada Lmst.	Schmidt (1928, 1938), Böhm (1895)	epifaunal herbivore and/or detritus-feeder
Omphaloptycha pupoides (STOPPANI, 1857)	Gastropod	Latemar Lmst.	Friesenbichler et al. (unpublished data)	epifaunal herbivore and/or detritus-feeder
Omphaloptycha pusilla (SCHMID, 1874)	Gastropod	Erfurt Fm.	Schmidt (1928, 1938)	epifaunal herbivore and/or detritus-feeder
Omphaloptycha pygmaea HOHENSTEIN, 1913	Gastropod	"Middle Muschelkalk"	Schmidt (1928, 1938)	epifaunal herbivore and/or detritus-feeder
Omphaloptycha pyramidata KOKEN, 1898	Gastropod	Trochitenkalk Fm., Meissner Fm.	Schmidt (1928, 1938), Ockert (1993)	epifaunal herbivore and/or detritus-feeder
Omphaloptycha retracta (KITTL, 1894)	Gastropod	Latemar Lmst., Marmolada Lmst.	Böhm (1895), Häberle (1908)	epifaunal herbivore and/or detritus-feeder
Omphaloptycha rhenana (KOKEN, 1898)	Gastropod	Jena Fm., Trochitenkalk Fm., Meissner Fm.	Schmidt (1928, 1938)	epifaunal herbivore and/or detritus-feeder
Omphaloptycha schaurothi KOKEN, 1898	Gastropod	Trochitenkalk Fm., Meissner Fm.	Schmidt (1928, 1938)	epifaunal herbivore and/or detritus-feeder
Omphaloptycha schuettei (GIEBEL, 1856)	Gastropod	Jena Fm.	Schmidt (1928, 1938)	epifaunal herbivore and/or detritus-feeder
Omphaloptycha signata KOKEN	Gastropod	"Middle Muschelkalk", Trochitenkalk Fm., Meissner Fm.	Schmidt (1928, 1938)	epifaunal herbivore and/or detritus-feeder
Omphaloptycha sp.	Gastropod	Marmolada Lmst.	Böhm (1895)	epifaunal herbivore and/or detritus-feeder
Omphaloptycha sp.	Gastropod	Viganvar, Lapis Lmst.	Foster & Sebe (2017)	epifaunal herbivore and/or detritus-feeder
Omphaloptycha sp. (?zitteli BÖHM, 1895)	Gastropod	Latemar Lmst.	Häberle (1908)	epifaunal herbivore and/or detritus-feeder
Omphaloptycha strombecki (DUNKER, 1851)	Gastropod	Jena Fm., "Middle Muschelkalk", Trochitenkalk Fm., Meissner Fm.	Schmidt (1928, 1938)	epifaunal herbivore and/or detritus-feeder
Omphaloptycha turris (GIEBEL, 1856)	Gastropod	Jena Fm., Trochitenkalk Fm., Meissner Fm.	Schmidt (1928, 1938)	epifaunal herbivore and/or detritus-feeder
Omphaloptycha zieteni (QUENSTEDT, 1884)	Gastropod	Erfurt Fm.	Schmidt (1928, 1938)	epifaunal herbivore and/or detritus-feeder
Omphaloptycha zitteli BÖHM, 1895	Gastropod	Marmolada Lmst.	Böhm (1895)	epifaunal herbivore and/or detritus-feeder
Omphaloptycha? (Coelostylina?) n. sp.	Gastropod	Latemar Lmst.	Häberle (1908)	epifaunal herbivore and/or detritus-feeder
Omphaloptycha? sp.	Gastropod	Tubiphytes-Lmst. Mb.	Nützel et al. (2018)	epifaunal herbivore and/or detritus-feeder
Omphaloptychia laevisphaera BATTEN & STOKES, 1986	Gastropod	Sinbad Fm.	Batten & Stokes (1986)	epifaunal herbivore and/or detritus-feeder
Omphyloptycha cf. gracillima KOKEN, 1898	Gastropod	Trochitenkalk Fm.	Ockert (1993)	epifaunal herbivore and/or detritus-feeder
Oonia glandiformis KOKEN, 1898	Gastropod	Trochitenkalk Fm., Meissner Fm.	Schmidt (1928, 1938)	epifaunal herbivore and/or detritus-feeder
Oonia goepperti (DUNKER, 1851)	Gastropod	Jena Fm., Trochitenkalk Fm., Meissner Fm.	Schmidt (1928, 1938)	epifaunal herbivore and/or detritus-feeder
Oonia minima (SCHMID, 1874)	Gastropod	Erfurt Fm.	Schmidt (1928, 1938), Urlichs (1992)	epifaunal herbivore and/or detritus-feeder
Oonia? n. sp.	Gastropod	Leidapo Mb.	Stiller (2001)	epifaunal herbivore and/or detritus-feeder
Ophioderma hauchecornei ECK, 1872	Ophiuroid	Jena Fm., Trochitenkalk Fm., Meissner Fm.	Hagdorn & Ockert (1993), Schmidt (1928, 1938)	epifaunal detritivore-suspension-feeder
Ophiodermatidae? n. sp. indet.	Ophiuroid	Lower Shale Unit	Brayard et al. (2017)	epifaunal detritivore-suspension-feeder
Opinae n. gen. et n. sp.	Bivalve	Leidapo Mb.	Stiller (2001)	shallow to moderately deep infaunal suspension-feeder
Orbicoelia speciosa (WANG, 1955)	Brachiopod	Luolou Fm., Daye Fm.	Hautmann et al. (2015), Foster et al. (2019)	pedunculate suspension-feeder
Orbiculoidea elegans LIAO, 1980	Brachiopod	Daye Fm.	Foster et al. (2019)	cemented epifaunal suspension-feeder
Orbiculoidea major WAGNER, 1913	Brachiopod	Meissner Fm.	Schmidt (1928, 1938)	cemented epifaunal suspension-feeder
Orbiculoidea schmidi (VON SEEBACH, 1876)	Brachiopod	Jena Fm.	Schmidt (1928, 1938)	cemented epifaunal suspension-feeder
Orbiculoidea silesiaca (DUNKER, 1851)	Brachiopod	Jena Fm., "Middle Muschelkalk", Trochitenkalk Fm., Meissner Fm.	Schmidt (1928, 1938)	cemented epifaunal suspension-feeder
Orbiculoidea sp.	Brachiopod	Lazurnaya Bay Fm.	Shigeta et al. (2009)	cemented epifaunal suspension-feeder
Orbiculoidea sp.	Brachiopod	Lower Shale Unit	Brayard et al. (2017)	cemented epifaunal suspension-feeder
Orbiculoidea sp. A	Brachiopod	Virgin Fm.	McGowan et al. (2009)	cemented epifaunal suspension-feeder
Orbiculoidea sp. B	Brachiopod	Virgin Fm.	McGowan et al. (2009)	cemented epifaunal suspension-feeder
Orbiculoidea winsnesi GOBBET, 1963	Brachiopod	Deltadalen Mb.	Foster et al. (2017a)	cemented epifaunal suspension-feeder
Ornithopecten cf. katzeri (BITTNER, 1902)	Bivalve	Tubiphytes-Lmst. Mb.	Friesenbichler et al. (2019a)	epibyssate suspension-feeder
Ornithopecten interruptus (BITTNER, 1902)	Bivalve	Tubiphytes-Lmst. Mb.	Friesenbichler et al. (2019a)	epibyssate suspension-feeder
Orthonota raabi PICARD, 1915	Bivalve	Jena Fm.	Schmidt (1928, 1938)	shallow to moderately deep infaunal suspension-feeder
Orthostylus cf. fuchsi VON KLIPSTEIN, 1843	Gastropod	Marmolada Lmst.	Böhm (1895)	epifaunal herbivore and/or detritus-feeder
Orthostylus hastile BÖHM, 1895	Gastropod	Marmolada Lmst.	Böhm (1895)	epifaunal herbivore and/or detritus-feeder
Ostrea multicostata MÜNSTER in GOLDFUSS, 1833	Bivalve	Jena Fm.	Wagner (1897)	cemented epifaunal suspension-feeder
Ostreoidea n. gen. et n. sp.	Bivalve	Leidapo Mb.	Stiller (2001)	cemented epifaunal suspension-feeder
Pachycardia plieningeri BROILI, 1903	Bivalve	Schlernplateau beds	Friesenbichler et al. (2019b)	shallow to moderately deep infaunal suspension-feeder
Pachycardia rugosa VON HAUER, 1857	Bivalve	Schlernplateau beds	Wöhrmann & Koken (1892), Friesenbichler et al. (2019b)	shallow to moderately deep infaunal suspension-feeder
Pachyomphalus americanus BATTEN & STOKES, 1986	Gastropod	Sinbad Fm.	Batten & Stokes (1986)	epifaunal herbivore and/or detritus-feeder
Pachyomphalus concinnus BÖHM, 1895	Gastropod	Latemar Lmst., Marmolada Lmst.	Böhm (1895), Häberle (1908)	epifaunal herbivore and/or detritus-feeder
Pachyomphalus n. sp.	Gastropod	Leidapo Mb.	Stiller (2001)	epifaunal herbivore and/or detritus-feeder
Pachyomphalus rectelabiatus (KITTL, 1894)	Gastropod	Latemar Lmst., Marmolada Lmst.	Böhm (1895), Häberle (1908)	epifaunal herbivore and/or detritus-feeder
Pachyomphalus subhybridus (D'ORBIGNY, 1847)	Gastropod	Latemar Lmst.	Häberle (1908)	epifaunal herbivore and/or detritus-feeder
Palaeacmaea postuma BÖHM, 1895	Gastropod	Marmolada Lmst.	Böhm (1895)	epifaunal herbivore and/or detritus-feeder
Palaeolima acutecostata (ASSMANN, 1937)	Bivalve	Leidapo Mb.	Stiller (2001)	epibyssate suspension-feeder
Palaeolima cf. dunkeri (ASSMANN, 1937)	Bivalve	Leidapo Mb.	Stiller (2001)	epibyssate suspension-feeder
Palaeolima dunkeri (ASSMANN, 1937)	Bivalve	Leidapo Mb.	Stiller (2001)	epibyssate suspension-feeder
Palaeolima subcostata YIN, 1974	Bivalve	Leidapo Mb.	Stiller (2001)	epibyssate suspension-feeder
Palaeonarica concentrica (MÜNSTER, 1841)	Gastropod	Schlernplateau beds	Wöhrmann & Koken (1892), Friesenbichler et al. (2019b)	epifaunal herbivore and/or detritus-feeder
Palaeonarica guangxinensis KAIM & NÜTZEL in KAIM ET AL., 2010	Gastropod	Luolou Fm., Daye Fm.	Hautmann et al. (2015), Foster et al. (2019)	epifaunal herbivore and/or detritus-feeder
Palaeonarica pyrulaeformis (VON KLIPSTEIN, 1843)	Gastropod	Schlernplateau beds	Blaschke (1905)	epifaunal herbivore and/or detritus-feeder
Palaeoneilo distincta (BITTNER, 1895)	Bivalve	Leidapo Mb.	Stiller (2001)	shallow infaunal deposit-feeder
Palaeoneilo elliptica (GOLDFUSS, 1837)	Bivalve	Jena Fm., Trochitenkalk Fm., Meissner Fm.	Schmidt (1928, 1938), Busse (1972), Hagdorn & Ockert (1993), Ockert (1993)	shallow infaunal deposit-feeder
Palaeoneilo praecursor (FRECH, 1904)	Bivalve	Felsöörs Fm.	Vörös (2003)	shallow infaunal deposit-feeder
Palaeonucula excavata (MÜNSTER, 1863)	Bivalve	Trochitenkalk Fm., Meissner Fm.	Schmidt (1928, 1938), Hagdorn & Ockert (1993), Ockert (1993)	shallow infaunal deposit-feeder
Palaeonucula goldfussi (VON ALBERTI, 1863)	Bivalve	Röt Fm., Jena Fm., Trochitenkalk Fm., Meissner Fm., Erfurt Fm.	Schmidt (1928, 1938), Busse (1972), Hagdorn & Ockert (1993), Ockert (1993), Urlichs (1992)	shallow infaunal deposit-feeder
Palaeonucula qingyanensis CHEN, 1976	Bivalve	Leidapo Mb.	Stiller (2001), Komatsu et al. (2001)	shallow infaunal deposit-feeder
Palaeonucula strigilata (GOLDFUSS, 1838)	Bivalve	Jena Fm., Leidapo Mb., Meissner Fm., "Middle Muschelkalk", Trochitenkalk Fm.	Schmidt (1928, 1938), Komatsu et al. (2004)	shallow infaunal deposit-feeder
Palaeonucula subcuneata (D'ORBIGNY, 1849)	Bivalve	Jena Fm., Trochitenkalk Fm., Meissner Fm.	Schmist (1938), Ockert (1993)	shallow infaunal deposit-feeder
Palaeorbis? sp.	Gastropod	Erfurt Fm.	Schmidt (1928, 1938)	epifaunal herbivore and/or detritus-feeder
Palaeotriton waltheri HÄBERLE, 1908	Gastropod	Latemar Lmst.	Häberle (1908)	epifaunal herbivore and/or detritus-feeder
Paralepismatina semiconica YANG & XU, 1966	Brachiopod	Leidapo Mb.	Stiller (2001)	pedunculate suspension-feeder
Parallelodon beyrichi (VON STROMBECK, 1849)	Bivalve	Jena Fm., Trochitenkalk Fm., Meissner Fm., Erfurt Fm., Leidapo Mb.	Schmidt (1928, 1938), Busse (1972), Hagdorn & Ockert (1993), Stiller (2001), Komatsu et al. (2001)	epibyssate suspension-feeder
Parallelodon elongatus (BITTNER, 1901)	Bivalve	Latemar Lmst.	Friesenbichler et al. (unpublished data)	epibyssate suspension-feeder
Parallelodon esinensis (STOPPANI, 1858)	Bivalve	Jena Fm., Leidapo Mb.	Schmidt (1928, 1938), Komatsu et al. (2004)	epibyssate suspension-feeder
Parallelodon sp.	Bivalve	Felsöörs Fm.	Vörös (2003)	ecology unsure
Parallelodon? aff. beyrichi (VON STROMBECK, 1850)	Bivalve	Virgin Fm.	Hautmann et al. (2013)	epibyssate suspension-feeder
Parallelodon? sp.	Bivalve	Leidapo Mb.	Stiller (2001)	epibyssate suspension-feeder
Parallelodon? sp.	Bivalve	Tubiphytes-Lmst. Mb.	Friesenbichler et al. (2019a)	ecology unsure
Patella crasseradiata KITTL, 1894	Gastropod	Marmolada Lmst.	Böhm (1895)	epifaunal herbivore and/or detritus-feeder
Patella crateriformis KITTL, 1894	Gastropod	Marmolada Lmst.	Böhm (1895)	epifaunal herbivore and/or detritus-feeder
Patella rimosa BÖHM, 1895	Gastropod	Marmolada Lmst.	Böhm (1895)	epifaunal herbivore and/or detritus-feeder
Patella sparsicostata BÖHM, 1895	Gastropod	Marmolada Lmst.	Böhm (1895)	epifaunal herbivore and/or detritus-feeder
Pecten (Entolium) cf. subdemissus (MÜNSTER, 1841)	Bivalve	Latemar Lmst.	Wilckens (1909)	free-lying suspension-feeder
Pecten broilii PHILIPPI, 1904	Bivalve	Latemar Lmst.	Wilckens (1909)	epibyssate suspension-feeder
Pecten cf. inornatus STOPPANI, 1860	Bivalve	Marmolada Lmst.	Salomon (1895)	free-lying suspension-feeder
Pecten delorenzoi WILCKENS, 1909	Bivalve	Latemar Lmst.	Wilckens (1909)	epibyssate suspension-feeder
Pecten ex. aff. albertii GOLDFUSS, 1838	Bivalve	Hidegkut Fm.	Bittner (1901)	epibyssate suspension-feeder
Pecten fassaensis PHILIPPI, 1904	Bivalve	Latemar Lmst.	Wilckens (1909)	epibyssate suspension-feeder
Pecten interstriatus MÜNSTER, 1841	Bivalve	Latemar Lmst.	Wilckens (1909)	epibyssate suspension-feeder
Pecten laterestriatus PHILIPPI, 1899	Bivalve	Jena Fm.	Schmidt (1928, 1938)	epibyssate suspension-feeder
Pecten morrisi GIEBEL, 1856	Bivalve	Jena Fm.	Schmidt (1928, 1938)	ecology unsure
Pecten predazzensis PHILIPPI, 1904	Bivalve	Latemar Lmst.	Wilckens (1909)	epibyssate suspension-feeder
Pecten reticulatus VON SCHLOTHEIM, 1813	Bivalve	Jena Fm., Trochitenkalk Fm., Meissner Fm.	Schmidt (1928, 1938)	epibyssate suspension-feeder
Pecten rosaliae SALOMON, 1895	Bivalve	Marmolada Lmst.	Salomon (1895)	epibyssate suspension-feeder
Pecten schmiederi GIEBEL, 1856	Bivalve	Jena Fm.	Schmidt (1928, 1938)	epibyssate suspension-feeder
Pecten seebachi SALOMON, 1895	Bivalve	Marmolada Lmst.	Salomon (1895)	epibyssate suspension-feeder
Pectinidae indet.	Bivalve	Tubiphytes-Lmst. Mb.	Friesenbichler et al. (2019a)	epibyssate suspension-feeder
Pemphix sueuri (DESMAREST, 1822)	Crustacean	Trochitenkalk Fm., Meissner Fm.	Schmidt (1928, 1938)	epifaunal carnivore
Pemphix? sp.	Crustacean	Marmolada Lmst.	Salomon (1895)	epifaunal carnivore
Penaeus atavus BILL, 1914	Crustacean	Röt Fm.	Schmidt (1928, 1938)	epifaunal carnivore
Pentacrinus sp.	Crinoid	Marmolada Lmst.	Salomon (1895)	erected epifaunal suspension-feeder
Periallus woodsidensis HOOVER, 1979	Brachiopod	Dinwoody Fm.	Hofmann et al. (2013a)	pedunculate suspension-feeder
Permophorus bregeri (GIRTY, 1927)	Bivalve	Dinwoody Fm.	Hofmann et al. (2013a)	shallow to moderately deep infaunal suspension-feeder
Permophorus cf. bregeri (GIRTY, 1927)	Bivalve	Sinbad Fm.	Hofmann et al. (2014)	shallow to moderately deep infaunal suspension-feeder
Permophorus cf. rotundus (GIRTY, 1927)	Bivalve	Daye Fm.	Foster et al. (2019)	shallow to moderately deep infaunal suspension-feeder
Permophorus cf. rotundus (GIRTY, 1927)	Bivalve	Luolou Fm.	Hautmann et al. (2015)	shallow to moderately deep infaunal suspension-feeder
Permophorus cf. similis (GIRTY, 1927)	Bivalve	Daye Fm.	Foster et al. (2019)	shallow to moderately deep infaunal suspension-feeder
Permophorus cf. similis (GIRTY, 1927)	Bivalve	Luolou Fm.	Hautmann et al. (2015)	shallow to moderately deep infaunal suspension-feeder
Permophorus triassicus NEWELL & BOYD, 1999	Bivalve	Virgin Fm.	Hautmann et al. (2013)	shallow to moderately deep infaunal suspension-feeder
Perna vetusta GOLDFUSS, 1836	Bivalve	Trochitenkalk Fm., Meissner Fm.	Schmidt (1928, 1938)	epibyssate suspension-feeder
Pernopecten sp.	Bivalve	Sinbad Fm.	Hofmann et al. (2014)	free-lying suspension-feeder
Pernopecten? sp.	Bivalve	Virgin Fm.	Hautmann et al. (2013)	free-lying suspension-feeder
Perotrochus introrsus BÖHM, 1895	Gastropod	Marmolada Lmst.	Böhm (1895)	epifaunal herbivore and/or detritus-feeder
Perotrochus leda (KITTL, 1894)	Gastropod	Marmolada Lmst.	Böhm (1895)	epifaunal herbivore and/or detritus-feeder
Perotrochus mammiformis (KITTL, 1894)	Gastropod	Marmolada Lmst.	Böhm (1895)	epifaunal herbivore and/or detritus-feeder
Perotrochus sp.	Gastropod	Marmolada Lmst.	Böhm (1895)	epifaunal herbivore and/or detritus-feeder
Perotrochus striatus BÖHM, 1895	Gastropod	Marmolada Lmst.	Böhm (1895)	epifaunal herbivore and/or detritus-feeder
Perotrochus tardemutatus (KITTL, 1894)	Gastropod	Marmolada Lmst.	Böhm (1895)	epifaunal herbivore and/or detritus-feeder
Perotrochus vasculum BÖHM, 1895	Gastropod	Marmolada Lmst.	Böhm (1895)	epifaunal herbivore and/or detritus-feeder
Phaenodesmia n. sp.	Bivalve	Leidapo Mb.	Stiller (2001)	shallow infaunal deposit-feeder
Phasianella cf. cingulata LAUBE, 1969	Gastropod	"Middle Muschelkalk"	Schmidt (1928, 1938)	epifaunal herbivore and/or detritus-feeder
Phestia (Polidevcia) subperlonga CHEN, 1976	Bivalve	Leidapo Mb.	Stiller (2001)	shallow infaunal deposit-feeder
Philobryidae n. gen. et n. sp. indet.	Bivalve	Leidapo Mb.	Stiller (2001)	epibyssate suspension-feeder
Pholadomya (Arcomya) sansonii SALOMON, 1895	Bivalve	Marmolada Lmst.	Salomon (1895)	shallow to moderately deep infaunal suspension-feeder
Piarorhynchella kittli GRĂDINARU & GAETANI, 2019	Brachiopod	Tubiphytes-Lmst. Mb.	Grădinaru & Gaetani (2019)	pedunculate suspension-feeder
Piarorhynchella triassica (GIRTY in MANSFIELD, 1927)	Brachiopod	Virgin Fm.	Hofmann et al. (2013b)	pedunculate suspension-feeder
Piarorhynchella trinodosi (BITTNER, 1890)	Brachiopod	Felsöörs Fm., Marmolada Lmst.	Szabó et al. (1979), Vörös (2003), Salomon (1895)	pedunculate suspension-feeder
Piarorhynchella? n. sp.	Brachiopod	Lazurnaya Bay Fm.	Shigeta et al. (2009)	pedunculate suspension-feeder
Pinna ecki PICARD, 1904	Bivalve	Jena Fm.	Schmidt (1928, 1938)	endobyssate suspension-feeder
Pinna simionescui FRIESENBICHLER, HAUTMANN, GRĂDINARU & BUCHER, 2019	Bivalve	Tubiphytes-Lmst. Mb.	Friesenbichler et al. (2019a)	endobyssate suspension-feeder
Pinna tommasii VON WÖHRMANN & KOKEN, 1892	Bivalve	Schlernplateau beds	Wöhrmann & Koken (1892), Friesenbichler et al. (2019b)	endobyssate suspension-feeder
Pinna? cf. raibliana PARONA, 1889	Bivalve	Tubiphytes-Lmst. Mb.	Friesenbichler et al. (2019a)	endobyssate suspension-feeder
Piratella badensis ASSMANN, 1927	Crustacean	Jena Fm., Röt Fm.	Schmidt (1928, 1938)	epifaunal carnivore
Placunopsis ostracina (VON SCHLOTHEIM, 1820)	Bivalve	Röt Fm., Jena Fm., Trochitenkalk Fm., Meissner Fm., Erfurt Fm.	Schmidt (1928, 1938), Busse (1972), Hagdorn & Mundlos (1982), Hagdorn & Ockert (1993)	cemented epifaunal suspension-feeder
Placunopsis plana GIEBEL, 1856	Bivalve	Jena Fm.	Schmidt (1928, 1938)	cemented epifaunal suspension-feeder
Placunopsis rugosa SANDBERGER, 1868	Bivalve	Jena Fm., Trochitenkalk Fm., Meissner Fm.	Schmidt (1928, 1938)	cemented epifaunal suspension-feeder
Placunopsis subplana YIN & YIN, 1983	Bivalve	Leidapo Mb.	Stiller (2001)	cemented epifaunal suspension-feeder
Plagioglypta guizhouensis STILLER, 2001	Scaphopod	Leidapo Mb.	Stiller (2001)	shallow infaunal deposit-feeder
Plagiostoma beyrichi ECK, 1865	Bivalve	Jena Fm., Leidapo Mb.	Schmidt (1928, 1938), Komatsu et al. (2004)	epibyssate suspension-feeder
Plagiostoma cf. angulatum (MÜNSTER, 1841)	Bivalve	Tubiphytes-Lmst. Mb.	Friesenbichler et al. (2019a)	epibyssate suspension-feeder
Plagiostoma costatum (MÜNSTER, 1836)	Bivalve	Jena Fm., Trochitenkalk Fm., Meissner Fm.	Schmidt (1928, 1938), Hagdorn & Mundlos (1982), Hagdorn & Ockert (1993), Ockert (1993)	epibyssate suspension-feeder
Plagiostoma lineatum (VON SCHLOTHEIM, 1823)	Bivalve	Jena Fm., Trochitenkalk Fm., Meissner Fm., Zuhanya Lmst.	Schmidt (1928, 1938), Foster & Sebe (2017)	epibyssate suspension-feeder
Plagiostoma n. sp.	Bivalve	Leidapo Mb.	Stiller (2001)	epibyssate suspension-feeder
Plagiostoma praecursor QUENSTEDT, 1856	Bivalve	Lapis Lmst.	Foster & Sebe (2017)	epibyssate suspension-feeder
Plagiostoma sp.	Bivalve	Felsöörs Fm.	Vörös (2003)	epibyssate suspension-feeder
Plagiostoma striatum (VON SCHLOTHEIM, 1820)	Bivalve	Jena Fm., "Middle Muschelkalk", Trochitenkalk Fm., Meissner Fm., Erfurt Fm., Tubiphytes-Lmst. Mb., Zuhanya Lmst., Felsöörs Fm., Leidapo Mb.	Schmidt (1928, 1938), Busse (1972), Hagdorn & Mundlos (1982), Hagdorn & Ockert (1993), Vörös (2003), Foster & Sebe (2017), Stiller (2001), Komatsu et al. (2004), Friesenbichler et al. (2019a)	epibyssate suspension-feeder
Plagiostoma tingi FAN	Bivalve	Leidapo Mb.	Komatsu et al. (2004)	epibyssate suspension-feeder
Platychilina cainalloi (STOPPANI, 1857)	Gastropod	Marmolada Lmst.	Böhm (1895)	epifaunal herbivore and/or detritus-feeder
Platychilina germanica PHILIPPI, 1898	Gastropod	Meissner Fm.	Schmidt (1928, 1938)	epifaunal herbivore and/or detritus-feeder
Platychilina singularis (KITTL, 1894)	Gastropod	Marmolada Lmst.	Böhm (1895)	epifaunal herbivore and/or detritus-feeder
Platychilina tuberculata (KITTL, 1894)	Gastropod	Marmolada Lmst.	Böhm (1895)	epifaunal herbivore and/or detritus-feeder
Platychilina tuberosa BÖHM, 1895	Gastropod	Marmolada Lmst.	Böhm (1895)	epifaunal herbivore and/or detritus-feeder
Platychilina woehrmanni VON WÖHRMANN & KOKEN, 1892	Gastropod	Schlernplateau beds	Wöhrmann & Koken (1892), Blaschke (1905), Friesenbichler et al. (2019b)	epifaunal herbivore and/or detritus-feeder
Pleuraster chopi ECK, 1872	Asteroid	Jena Fm.	Schmidt (1928, 1938)	epifaunal carnivore
Pleuromya brevis ASSMANN, 1915	Bivalve	Röt Fm., Jena Fm.	Schmidt (1928, 1938)	shallow to moderately deep infaunal suspension-feeder
Pleuromya cf. fassaensis WISSMANN in MÜNSTER, 1841	Bivalve	Röt Fm., Jena Fm.	Schmidt (1928, 1938)	shallow to moderately deep infaunal suspension-feeder
Pleuromya ecki PHILIPPI, 1898	Bivalve	Röt Fm., Trochitenkalk Fm., Meissner Fm.,	Schmidt (1928, 1938)	shallow to moderately deep infaunal suspension-feeder
Pleuromya elongata (VON SCHLOTHEIM, 1822)	Bivalve	Campil Mb., Cencenighe Mb., Gastropod Oolith, Seis Mb., Val Badia Mb., Erfurt Fm., Felsöörs Fm., Meissner Fm.	Broglio Loriga et al. (1990), Neri & Posenato (1985), Schmidt (1928, 1938), Urlichs (1992)	shallow to moderately deep infaunal suspension-feeder
Pleuromya grandis (MÜNSTER, 1841)	Bivalve	Jena Fm., Trochitenkalk Fm., Meissner Fm.	Schmidt (1928, 1938)	deep infaunal suspension-feeder
Pleuromya mactroides (VON SCHLOTHEIM, 1820)	Bivalve	Trochitenkalk Fm., Meissner Fm.	Schmidt (1928, 1938)	shallow to moderately deep infaunal suspension-feeder
Pleuromya musculoides (VON SCHLOTHEIM, 1820)	Bivalve	Röt Fm., Jena Fm., Trochitenkalk Fm., Meissner Fm., Erfurt Fm.	Schmidt (1928, 1938), Busse (1972), Hagdorn & Ockert (1993), Ockert (1993)	deep infaunal suspension-feeder
Pleuromya prima HAUTMANN, SMITH, MCGOWAN & BUCHER, 2013	Bivalve	Virgin Fm.	Hautmann et al. (2013)	deep infaunal suspension-feeder
Pleuromya prosogyra SALOMON, 1895	Bivalve	Marmolada Lmst.	Salomon (1895)	shallow to moderately deep infaunal suspension-feeder
Pleuromya rugosa AHLBURG, 1906	Bivalve	Röt Fm.	Schmidt (1928, 1938)	shallow to moderately deep infaunal suspension-feeder
Pleuromya sensimstriata ASSMANN, 1915	Bivalve	Jena Fm., Meissner Fm.	Schmidt (1928, 1938)	shallow to moderately deep infaunal suspension-feeder
Pleuromya sp.	Bivalve	Jena Fm., Meissner Fm.	Schmidt (1928, 1938)	shallow to moderately deep infaunal suspension-feeder
Pleuromya ventricosa VON SCHLOTHEIM, 1820	Bivalve	Trochitenkalk Fm., Meissner Fm.	Schmidt (1928, 1938)	shallow to moderately deep infaunal suspension-feeder
Pleuromya? fedaiana SALOMON, 1895	Bivalve	Marmolada Lmst.	Salomon (1895)	shallow to moderately deep infaunal suspension-feeder
Pleuromya? sp.	Bivalve	Marmolada Lmst.	Salomon (1895)	ecology unsure
Pleuronectites difformis CHEN, MA & ZHANG, 1974	Bivalve	Leidapo Mb.	Stiller (2001), Komatsu et al. (2004)	epibyssate suspension-feeder
Pleuronectites laevigatus (VON SCHLOTHEIM, 1820)	Bivalve	Röt Fm., Jena Fm., Trochitenkalk Fm., Meissner Fm., Felsöörs Fm.	Schmidt (1928, 1938), Busse (1972), Hagdorn & Mundlos (1982), Hagdorn & Ockert (1993), Vörös (2003)	epibyssate suspension-feeder
Pleuronectites? cf. balatonicus (BITTNER, 1901)	Bivalve	Tubiphytes-Lmst. Mb.	Friesenbichler et al. (2019a)	epibyssate suspension-feeder
Pleuronectites? cf. laevigatus (VON SCHLOTHEIM, 1820)	Bivalve	Leidapo Mb.	Stiller (2001), Komatsu et al. (2004)	epibyssate suspension-feeder
Pleuronectites? sp.	Bivalve	Lower Shale Unit	Brayard et al. (2017)	epibyssate suspension-feeder
Pleurotomaria (Worthenia) canalifera MÜNSTER, 1841	Gastropod	Schlernplateau beds	Wöhrmann & Koken (1892)	epifaunal herbivore and/or detritus-feeder
Pleurotomaria (Worthenia) exsul WÖHRMANN & KOKEN, 1892	Gastropod	Schlernplateau beds	Wöhrmann & Koken (1892)	epifaunal herbivore and/or detritus-feeder
Pleurotomaria albertiana WISSMANN, 1842	Gastropod	Jena Fm.	Wagner (1897)	epifaunal herbivore and/or detritus-feeder
Pleurotomarioidea n. gen. et n. sp. indet.	Gastropod	Leidapo Mb.	Stiller (2001)	epifaunal herbivore and/or detritus-feeder
Pleurozygopleuridae indet.	Gastropod	Deltadalen Mb.	Foster et al. (2017a)	epifaunal herbivore and/or detritus-feeder
Plicatula n. sp.	Bivalve	Leidapo Mb.	Stiller (2001)	cemented epifaunal suspension-feeder
Poligyrina sp.	Gastropod	Gastropod Oolithe, Campil Mb.	Broglio Loriga et al. (1990)	epifaunal herbivore and/or detritus-feeder
Polygyrina sp.	Gastropod	Sinbad Fm.	Hofmann et al. (2014)	epifaunal herbivore and/or detritus-feeder
Polygyrina? peracuta (ASSMANN, 1937)	Gastropod	Tubiphytes-Lmst. Mb.	Nützel et al. (2018)	epifaunal herbivore and/or detritus-feeder
Pontisiinae n. gen. et n. sp. indet.	Brachiopod	Lazurnaya Bay Fm.	Shigeta et al. (2009)	pedunculate suspension-feeder
Posidonia cf. wengensis (WISSMANN, 1841)	Bivalve	Leidapo Mb.	Stiller (2001)	epibyssate suspension-feeder
Posidonia pannonica (VON MOJSISOVICS, 1873)	Bivalve	Leidapo Mb.	Stiller (2001), Komatsu et al. (2004)	epibyssate suspension-feeder
Posidonomya obliqua VON HAUER, 1875	Bivalve	Latemar Lmst.	Wilckens (1909)	free-lying suspension-feeder
Praeaplocoma hessi BROGLIO LORIGA & BERTI CAVICCHI, 1972	Ophiuroid	Val Badia Mb., Cencenighe Mb.	Broglio Loriga et al. (1990), Hofmann et al. (2014)	epifaunal detritivore-suspension-feeder
Praechlamys badiotica (BITTNER, 1895)	Bivalve	Leidapo Mb.	Komatsu et al. (2004)	epibyssate suspension-feeder
Praechlamys schroeteri (GIEBEL, 1856)	Bivalve	Jena Fm., Leidapo Mb.	Schmidt (1928, 1938), Stiller (2001), Komatsu et al. (2004)	epibyssate suspension-feeder
Praechlamys stenodictya (SALOMON, 1895)	Bivalve	Leidapo Mb., Marmolada Lmst.	Stiller (2001)	epibyssate suspension-feeder
Praedicerocardium vetulus FRIESENBICHLER, HAUTMANN, GRĂDINARU & BUCHER, 2019	Bivalve	Tubiphytes-Lmst. Mb.	Friesenbichler et al. (2019a)	free-lying suspension-feeder
Prodentalium qingyanicum STILLER, 2001	Scaphopod	Leidapo Mb.	Stiller (2001)	shallow infaunal deposit-feeder
Promathilda antonii KITTL, 1895	Gastropod	Marmolada Lmst., Leidapo Mb., Trochitenkalk Fm., Meissner Fm.	Stiller (2001), Böhm (1895), Schmidt (1928, 1938)	epifaunal herbivore and/or detritus-feeder
Promathilda bolina (MÜNSTER, 1841)	Gastropod	Jena Fm., Trochitenkalk Fm., Meissner Fm., Erfurt Fm.	Schmidt (1928, 1938)	epifaunal herbivore and/or detritus-feeder
Promathilda cf. tenuicarinata ASSMANN, 1924	Gastropod	Leidapo Mb.	Stiller (2001)	epifaunal herbivore and/or detritus-feeder
Promathilda koeneni (PICARD, 1903)	Gastropod	Erfurt Fm.	Schmidt (1928, 1938)	epifaunal herbivore and/or detritus-feeder
Promathilda n. sp. A	Gastropod	Leidapo Mb.	Stiller (2001)	epifaunal herbivore and/or detritus-feeder
Promathilda n. sp. B	Gastropod	Leidapo Mb.	Stiller (2001)	epifaunal herbivore and/or detritus-feeder
Promathilda n. sp. C	Gastropod	Leidapo Mb.	Stiller (2001)	epifaunal herbivore and/or detritus-feeder
Promathilda ornata (VON ALBERTI, 1864)	Gastropod	Meissner Fm., Erfurt Fm.	Schmidt (1928, 1938)	epifaunal herbivore and/or detritus-feeder
Promathilda pauciornata ASSMANN, 1937	Gastropod	Jena Fm.	Schmidt (1928, 1938)	epifaunal herbivore and/or detritus-feeder
Promathilda spirocostata BATTEN & STOKES, 1986	Gastropod	Sinbad Fm.	Batten & Stokes (1986)	epifaunal herbivore and/or detritus-feeder
Promathilda? sp.	Gastropod	Leidapo Mb.	Stiller (2001)	epifaunal herbivore and/or detritus-feeder
Promathildia biserta (MÜNSTER, 1841)	Gastropod	Latemar Lmst.	Häberle (1908)	epifaunal herbivore and/or detritus-feeder
Promathildia colon (MÜNSTER, 1841)	Gastropod	Latemar Lmst.	Häberle (1908)	epifaunal herbivore and/or detritus-feeder
Promathildia n. sp.	Gastropod	Latemar Lmst.	Häberle (1908)	epifaunal herbivore and/or detritus-feeder
Promathildia piliformis BÖHM, 1895	Gastropod	Marmolada Lmst.	Böhm (1895)	epifaunal herbivore and/or detritus-feeder
Promathildia pygmaea (MÜNSTER, 1841)	Gastropod	Schlernplateau beds	Wöhrmann & Koken (1892), Blaschke (1905), Friesenbichler et al. (2019b)	epifaunal herbivore and/or detritus-feeder
Promathildia? n. sp.	Gastropod	Latemar Lmst.	Häberle (1908)	epifaunal herbivore and/or detritus-feeder
Promyalina putiatinensis (KIPARISOVA, 1938)	Bivalve	Virgin Fm., Luolou Fm., Dinwoody Fm., Lazurnaya Bay Fm., Daye Fm.	Hautmann et al. (2013), Hofmann et al. (2013a, b), Shigeta et al. (2009), Foster et al. (2019)	epibyssate suspension-feeder
Promyalina schamarae (BITTNER, 1899)	Bivalve	Deltadalen Mb., Lazurnaya Bay Fm.	Shigeta et al. (2009), Foster et al. (2017a)	epibyssate suspension-feeder
Promyalina sp.	Bivalve	Tesero Oolithe, Campil Mb., Val Badia Mb., Cencenighe Mb.	Broglio Loriga et al. (1990)	epibyssate suspension-feeder
Promyalina spathi (NEWELL & KUMMEL, 1942)	Bivalve	Dinwoody Fm., Virgin Fm.	Hofmann et al. (2013a, b)	epibyssate suspension-feeder
Promysidiella sp.	Bivalve	Sinbad Fm.	Hofmann et al. (2014)	epibyssate suspension-feeder
Promysidiella? sp.	Bivalve	Luolou Fm.	Hautmann et al. (2015)	epibyssate suspension-feeder
Prospondylus salomoni GRUBER, 1932	Bivalve	Trochitenkalk Fm., Meissner Fm.	Schmidt (1928, 1938)	epibyssate suspension-feeder
Prostylifer (Amauropsis) paludinaris (MÜNSTER, 1841)	Gastropod	Latemar Lmst., Marmolada Lmst.	Böhm (1895), Häberle (1908)	epifaunal herbivore and/or detritus-feeder
Protogusarella smithi PERRY & CHATTERTON, 1979	Brachiopod	Virgin Fm.	McGowan et al. (2009), Hofmann et al. (2013b)	pedunculate suspension-feeder
Protonerita coarctata (QUENSTEDT, 1850)	Gastropod	Jena Fm., Trochitenkalk Fm., Meissner Fm.	Schmidt (1928, 1938)	epifaunal herbivore and/or detritus-feeder
Protonerita spirata (VON SCHLOTHEIM, 1820)	Gastropod	Jena Fm., Trochitenkalk Fm., Meissner Fm., Erfurt Fm.	Schmidt (1928, 1938)	epifaunal herbivore and/or detritus-feeder
Protonerita? cf. comensis (HÖRNES, 1856)	Gastropod	Tubiphytes-Lmst. Mb.	Nützel et al. (2018)	epifaunal herbivore and/or detritus-feeder
Protopis cf. waageni (SCHNETZER, 1934)	Bivalve	Felsöörs Fm.	Vörös (2003)	epibyssate suspension-feeder
Protopis joannae (WAAGEN, 1906)	Bivalve	Leidapo Mb.	Stiller (2001)	epibyssate suspension-feeder
Protopis sp.	Bivalve	Virgin Fm.	Hofmann et al. (2013b)	epibyssate suspension-feeder
Protopis? sp.	Bivalve	Felsöörs Fm.	Vörös (2003)	epibyssate suspension-feeder
Protorcula kittli HÄBERLE, 1908	Gastropod	Latemar Lmst.	Häberle (1908)	epifaunal herbivore and/or detritus-feeder
Protorcula lissotropis PICARD, 1903	Gastropod	Jena Fm.	Schmidt (1928, 1938)	epifaunal herbivore and/or detritus-feeder
Protorcula n. sp.	Gastropod	Latemar Lmst.	Häberle (1908)	epifaunal herbivore and/or detritus-feeder
Protorcula n. sp. indet. ex affin. P. pusillae (STOPPANI, 1858)	Gastropod	Latemar Lmst.	Häberle (1908)	epifaunal herbivore and/or detritus-feeder
Protorcula punctata PICARD, 1903	Gastropod	Jena Fm.	Schmidt (1928, 1938)	epifaunal herbivore and/or detritus-feeder
Protorcula pusilla (STOPPANI, 1858)	Gastropod	Latemar Lmst.	Häberle (1908)	epifaunal herbivore and/or detritus-feeder
Protorcula subpunctata (MÜNSTER, 1841)	Gastropod	Schlernplateau beds	Wöhrmann & Koken (1892), Blaschke (1905), Friesenbichler et al. (2019b)	epifaunal herbivore and/or detritus-feeder
Protorcula? n. sp.	Gastropod	Leidapo Mb.	Stiller (2001)	epifaunal herbivore and/or detritus-feeder
Protorcula? sp.	Gastropod	Latemar Lmst.	Häberle (1908)	epifaunal herbivore and/or detritus-feeder
Protostrea sinensis (XU in XU & CHEN, 1943)	Bivalve	Leidapo Mb.	Stiller (2001), Komatsu et al. (2004)	cemented epifaunal suspension-feeder
Provermicularia n. sp. A	Gastropod	Leidapo Mb.	Stiller (2001)	epifaunal herbivore and/or detritus-feeder
Pseudobrochidium germanicum GRUPE, 1907	Gastropod	Erfurt Fm.	Schmidt (1928, 1938)	epifaunal herbivore and/or detritus-feeder
Pseudocorbula gregaria (MÜNSTER, 1838)	Bivalve	Jena Fm., "Middle Muschelkalk", Trochitenkalk Fm., Meissner Fm., Felsöörs Fm.	Schmidt (1928, 1938), Busse (1972), Hagdorn & Ockert (1993), Ockert (1993), Urlichs (1992), Vörös (2003)	shallow to moderately deep infaunal suspension-feeder
Pseudocorbula nuculaeformis (ZENKER, 1934)	Bivalve	Röt Fm., Jena Fm., "Middle Muschelkalk", Trochitenkalk Fm., Meissner Fm.	Schmidt (1928, 1938), Ockert (1993)	shallow to moderately deep infaunal suspension-feeder
Pseudocorbula plana (HOHENSTEIN, 1913)	Bivalve	"Middle Muschelkalk", Trochitenkalk Fm.	Schmidt (1928, 1938), Ockert (1993)	shallow to moderately deep infaunal suspension-feeder
Pseudocorbula sandbergeri (PHILIPPI, 1898)	Bivalve	"Middle Muschelkalk", Trochitenkalk Fm., Meissner Fm.	Schmidt (1928, 1938), Busse (1972), Ockert (1993), Urlichs (1992)	shallow to moderately deep infaunal suspension-feeder
Pseudocorbula sp.	Bivalve	Zuhanya Lmst.	Foster & Sebe (2017)	shallow to moderately deep infaunal suspension-feeder
Pseudolucina cassiana (BITTNER, 1895)	Bivalve	Latemar Lmst.	Wilckens (1909)	epibyssate suspension-feeder
Pseudomelania (Oonia) cf. similis (MÜNSTER, 1841)	Gastropod	Marmolada Lmst.	Böhm (1895)	epifaunal herbivore and/or detritus-feeder
Pseudomelania (Oonia) muensteri (WISSMANN in MÜNSTER, 1841)	Gastropod	Latemar Lmst.	Friesenbichler et al. (unpublished data)	epifaunal herbivore and/or detritus-feeder
Pseudomelania (Oonia) ovula KITTL, 1894	Gastropod	Marmolada Lmst.	Böhm (1895)	epifaunal herbivore and/or detritus-feeder
Pseudomelania (Oonia) similis (MÜNSTER, 1841)	Gastropod	Latemar Lmst.	Friesenbichler et al. (unpublished data)	epifaunal herbivore and/or detritus-feeder
Pseudomelania (Oonia) subtortilis (MÜNSTER, 1841)	Gastropod	Marmolada Lmst.	Böhm (1895)	epifaunal herbivore and/or detritus-feeder
Pseudomelania sp.	Gastropod	Latemar Lmst.	Häberle (1908)	epifaunal herbivore and/or detritus-feeder
Pseudomelania subsimilis KITTL, 1894	Gastropod	Marmolada Lmst.	Böhm (1895)	epifaunal herbivore and/or detritus-feeder
Pseudomonotis bittneri PHILIPP, 1904	Bivalve	Latemar Lmst.	Wilckens (1909)	epibyssate suspension-feeder
Pseudomonotis inaequistriata ASSMANN, 1937	Bivalve	Jena Fm.	Schmidt (1928, 1938)	epibyssate suspension-feeder
Pseudomonotis laczkoi BITTNER, 1901	Bivalve	Campil Mb., Hidegkut Fm.	Bittner (1901), Broglio Loriga et al. (1990)	epibyssate suspension-feeder
Pseudomurchisonia extracta (BERGER, 1854)	Gastropod	Jena Fm.	Schmidt (1928, 1938)	epifaunal herbivore and/or detritus-feeder
Pseudomurchisonia kokeni WITTENBURG, 1908	Gastropod	Mazzin Mb., Seis Mb.	Hofmann et al. (2014)	epifaunal herbivore and/or detritus-feeder
Pseudomyoconcha gastrochaena (GIEBEL, 1856)	Bivalve	Röt Fm., Jena Fm., Trochitenkalk Fm., Meissner Fm., Erfurt Fm.	Schmidt (1928, 1938), Busse (1972), Hagdorn & Ockert (1993), Ockert (1993)	endobyssate suspension-feeder
Pseudomyoconcha goldfussi (DUNKER, 1849)	Bivalve	Jena Fm., Trochitenkalk Fm., Meissner Fm., Leidapo Mb.	Schmidt (1928, 1938), Busse (1972), Ockert (1993), Stiller (2001)	endobyssate suspension-feeder
Pseudomyoconcha maximilianileuchtenbergensis (VON KLIPSTEIN, 1843)	Bivalve	Leidapo Mb.	Stiller (2001)	epibyssate suspension-feeder
Pseudomyoconcha muelleri (GIEBEL, 1856)	Bivalve	Jena Fm., Trochitenkalk Fm., Meissner Fm., Marmolada Lmst.	Schmidt (1928, 1938), Hagdorn & Ockert (1993), Busse (1972)	endobyssate suspension-feeder
Pseudopemphix albertii VON MEYER, 1840	Crustacean	Jena Fm.	Schmidt (1928, 1938)	epifaunal carnivore
Pseudopemphix fritschi WÜST, 1840	Crustacean	Jena Fm., "Middle Muschelkalk", Trochitenkalk Fm., Meissner Fm.	Schmidt (1928, 1938)	epifaunal carnivore
Pseudopemphix meyeri (VON ALBERTI, 1864)	Crustacean	Trochitenkalk Fm., Meissner Fm.	Schmidt (1928, 1938)	epifaunal carnivore
Pseudopemphix spinosus ASSMANN, 1927	Crustacean	Jena Fm.	Schmidt (1928, 1938)	epifaunal carnivore
Pseudoplacunopsis n. sp. A	Bivalve	Leidapo Mb.	Stiller (2001)	cemented epifaunal suspension-feeder
Pseudoplacunopsis n. sp. B	Bivalve	Leidapo Mb.	Stiller (2001)	cemented epifaunal suspension-feeder
Pseudoscalites n. sp.	Gastropod	Leidapo Mb.	Stiller (2001)	epifaunal herbivore and/or detritus-feeder
Pseudoscalites woehrmanni BLASCHKE, 1905	Gastropod	Schlernplateau beds	Blaschke (1905)	epifaunal herbivore and/or detritus-feeder
Pteria cassiana (BITTNER, 1895)	Bivalve	Leidapo Mb.	Stiller (2001), Komatsu et al. (2004)	epibyssate suspension-feeder
Pteria caudata (STOPPANI, 1857)	Bivalve	Leidapo Mb.	Stiller (2001)	epibyssate suspension-feeder
Pteria cf. cassiana (BITTNER, 1895)	Bivalve	Tubiphytes-Lmst. Mb.	Friesenbichler et al. (2019a)	epibyssate suspension-feeder
Pteria cf. sturi (BITTNER, 1895)	Bivalve	Leidapo Mb.	Komatsu et al. (2004)	epibyssate suspension-feeder
Pteria cf. ussurica (KIPARISOVA, 1938)	Bivalve	Mazzin Mb., Seis Mb.	Hofmann et al. (2015)	epibyssate suspension-feeder
Pteria cortinensis (BITTNER, 1895)	Bivalve	Latemar Lmst.	Friesenbichler et al. (unpublished data)	epibyssate suspension-feeder
Pteria kokeni (VON WOEHRMANN & KOKEN, 1892)	Bivalve	Schlernplateau beds	Wöhrmann & Koken (1892), Friesenbichler et al. (2019b)	epibyssate suspension-feeder
Pteria rugosa CHEN, MA & ZHANG, 1974	Bivalve	Leidapo Mb.	Stiller (2001), Komatsu et al. (2004)	epibyssate suspension-feeder
Pteria sp. A	Bivalve	Tubiphytes-Lmst. Mb.	Friesenbichler et al. (2019a)	epibyssate suspension-feeder
Pteria sp. B	Bivalve	Tubiphytes-Lmst. Mb.	Friesenbichler et al. (2019a)	epibyssate suspension-feeder
Pteria sturi (BITTNER, 1895)	Bivalve	Tubiphytes-Lmst. Mb.	Friesenbichler et al. (2019a)	epibyssate suspension-feeder
Pteria ussurica (KIPARISOVA, 1938)	Bivalve	Dinwoody Fm., Lazurnaya Bay Fm., Zhitkov Fm.	Hofmann et al. (2013a), Shigeta et al. (2009)	epibyssate suspension-feeder
Ptychomentzelia dobrogeana GRĂDINARU & GAETANI, 2019	Brachiopod	Tubiphytes-Lmst. Mb.	Grădinaru & Gaetani (2019)	pedunculate suspension-feeder
Ptychomentzelia simionescui GRĂDINARU & GAETANI, 2019	Brachiopod	Tubiphytes-Lmst. Mb.	Grădinaru & Gaetani (2019)	pedunculate suspension-feeder
Ptychomphalia cf. canovana KITTL, 1899	Gastropod	Latemar Lmst.	Häberle (1908)	epifaunal herbivore and/or detritus-feeder
Ptychomphalina? camerata GRUBER, 1933	Gastropod	Trochitenkalk Fm., Meissner Fm.	Schmidt (1928, 1938)	epifaunal herbivore and/or detritus-feeder
Punctospirella sp.	Brachiopod	Tubiphytes-Lmst. Mb.	Grădinaru & Gaetani (2019)	pedunculate suspension-feeder
Purpuroidea raiblensis BLASCHKE, 1905	Gastropod	Schlernplateau beds	Blaschke (1905)	epifaunal herbivore and/or detritus-feeder
Pustularia alpina VON EICHWALD, 1851	Gastropod	Schlernplateau beds	Wöhrmann & Koken (1892), Blaschke (1905), Friesenbichler et al. (2019b)	epifaunal herbivore and/or detritus-feeder
Pustularia sp.	Gastropod	Jena Fm., Trochitenkalk Fm., Meissner Fm.	Schmidt (1928, 1938)	epifaunal herbivore and/or detritus-feeder
Qingyanocrinus kueichounensis (DUBATOLOVA & SHAO, 1959)	Crinoid	Leidapo Mb.	Stiller (2001)	erected epifaunal suspension-feeder
Qingyenia spinosa YANG & XU, 1966	Brachiopod	Leidapo Mb.	Stiller (2001)	pedunculate suspension-feeder
Quadratia quadrata YIN, 1974	Bivalve	Leidapo Mb.	Stiller (2001), Komatsu et al. (2004)	shallow to moderately deep infaunal suspension-feeder
Rama ptychitica (KITTL, 1894)	Gastropod	Marmolada Lmst.	Böhm (1895)	epifaunal herbivore and/or detritus-feeder
Rasatomaria multistriata NÜTZEL, KAIM & GRĂDINARU, 2018	Gastropod	Tubiphytes-Lmst. Mb.	Nützel et al. (2018)	epifaunal herbivore and/or detritus-feeder
Reducta sp.	Gastropod	Viganvar	Foster & Sebe (2017)	epifaunal herbivore and/or detritus-feeder
Retispira asiatica (WIRTH, 1936)	Gastropod	Daye Fm.	Foster et al. (2019)	epifaunal herbivore and/or detritus-feeder
Retzia mojsisovicsi BOECKHI, 1872	Brachiopod	Marmolada Lmst.	Salomon (1895)	pedunculate suspension-feeder
Retzia taramelli SALOMON, 1895	Brachiopod	Marmolada Lmst.	Salomon (1895)	pedunculate suspension-feeder
Rhabdoconcha conoidea KITTL, 1894	Gastropod	Marmolada Lmst.	Böhm (1895)	epifaunal herbivore and/or detritus-feeder
Rhaetina sp.	Brachiopod	Tubiphytes-Lmst. Mb.	Grădinaru & Gaetani (2019)	pedunculate suspension-feeder
Rhynchonella (Norella) rosaliae SALOMON, 1895	Brachiopod	Marmolada Lmst.	Salomon (1895)	pedunculate suspension-feeder
Rhynchonella caressae PHILIPP, 1904	Brachiopod	Latemar Lmst.	Wilckens (1909)	pedunculate suspension-feeder
Rhynchonella cf. attilina BITTNER, 1890	Brachiopod	Latemar Lmst.	Wilckens (1909)	pedunculate suspension-feeder
Rhynchonella cf. bajuvarica BITTNER, 1890	Brachiopod	Latemar Lmst.	Wilckens (1909)	pedunculate suspension-feeder
Rhynchonella cf. cimbrica? BITTNER, 1890	Brachiopod	Latemar Lmst.	Wilckens (1909)	pedunculate suspension-feeder
Rhynchonella ex. aff. lycodon BITTNER, 1892	Brachiopod	Latemar Lmst.	Wilckens (1909)	pedunculate suspension-feeder
Rhynchonella protractifrons BITTNER, 1890	Brachiopod	Marmolada Lmst.	Salomon (1895)	pedunculate suspension-feeder
Rhynchonella suessi PHILIPP, 1904	Brachiopod	Latemar Lmst.	Wilckens (1909)	pedunculate suspension-feeder
Rhynchonellid indet.	Brachiopod	Virgin Fm.	McGowan et al. (2009)	pedunculate suspension-feeder
Rhynchonellidae n. gen. et n. sp. indet.	Brachiopod	Lazurnaya Bay Fm.	Shigeta et al. (2009)	pedunculate suspension-feeder
Riselloidea guizhouensis YU, PAN & WANG, 1974	Gastropod	Leidapo Mb.	Stiller (2001)	epifaunal herbivore and/or detritus-feeder
Riselloidea n. sp. A	Gastropod	Leidapo Mb.	Stiller (2001)	epifaunal herbivore and/or detritus-feeder
Riselloidea n. sp. B	Gastropod	Leidapo Mb.	Stiller (2001)	epifaunal herbivore and/or detritus-feeder
Rissoa (dubia var.) turbo VON SCHAUROTH, 1857	Gastropod	Erfurt Fm.	Schmidt (1928, 1938)	epifaunal herbivore and/or detritus-feeder
Rissoa strombecki VON SCHAUROTH, 1857	Gastropod	Erfurt Fm.	Schmidt (1928, 1938), Urlichs (1992)	epifaunal herbivore and/or detritus-feeder
Romaniamya mahmudiaensis FRIESENBICHLER, HAUTMANN, GRĂDINARU & BUCHER, 2019	Bivalve	Tubiphytes-Lmst. Mb.	Friesenbichler et al. (2019a)	deep infaunal suspension-feeder
Rothpletzella richthofeni BÖHM, 1895	Gastropod	Marmolada Lmst.	Böhm (1895)	epifaunal herbivore and/or detritus-feeder
Ruxingella lianjiangensis STILLER, 2000	Serpulid	Leidapo Mb.	Stiller (2001)	cemented epifaunal suspension-feeder
Scaphopod indet.	Scaphopod	Sinbad Fm.	Nützel & Schulbert (2005)	shallow infaunal deposit-feeder
Schafhaeutlia astartiformis (MÜNSTER, 1841)	Bivalve	Tubiphytes-Lmst. Mb., Jena Fm., Leidapo Mb., Latemar Lmst., Schlernplateau beds	Friesenbichler et al. (2019a, b, unpublished data), Stiller (2001), Komatsu et al. (2004), Wöhrmann & Koken (1892), Schmidt (1928, 1938)	shallow to moderately deep infaunal suspension-feeder
Schafhaeutlia cingulata (STOPPANI, 1860)	Bivalve	Jena Fm.	Schmidt (1928, 1938)	shallow to moderately deep infaunal suspension-feeder
Schafhaeutlia laubei (BITTNER, 1895)	Bivalve	Leidapo Mb.	Komatsu et al. (2004)	shallow to moderately deep infaunal suspension-feeder
Schafhaeutlia liscaviensis ASSMANN, 1937	Bivalve	Jena Fm.	Schmidt (1928, 1938)	shallow to moderately deep infaunal suspension-feeder
Schafhaeutlia mellingi (VON HAUER, 1857)	Bivalve	Leidapo Mb., Schlernplateau beds	Wöhrmann & Koken (1892), Komatsu et al. (2004)	shallow to moderately deep infaunal suspension-feeder
Schafhaeutlia philippii (ASSMANN, 1915)	Bivalve	Meissner Fm.	Schmidt (1928, 1938)	shallow to moderately deep infaunal suspension-feeder
Schafhaeutlia plana (MÜNSTER, 1841)	Bivalve	Marmolada Lmst., Jena Fm., Meissner Fm.	Salomon (1895), Schmidt (1928, 1938)	shallow to moderately deep infaunal suspension-feeder
Schafhaeutlia? sp.	Bivalve	Felsöörs Fm.	Vörös (2003)	shallow to moderately deep infaunal suspension-feeder
Schafhaeutlia? sp.	Bivalve	Leidapo Mb.	Stiller (2001)	shallow to moderately deep infaunal suspension-feeder
Schafhaeutlia? trigona (STOPPANI, 1858)	Bivalve	Tubiphytes-Lmst. Mb.	Friesenbichler et al. (2019a)	shallow to moderately deep infaunal suspension-feeder
Schizogonium pentagonum YU, PAN & WANG, 1974	Gastropod	Leidapo Mb.	Stiller (2001)	epifaunal herbivore and/or detritus-feeder
Schizogonium subcostatum (MÜNSTER, 1841)	Gastropod	Marmolada Lmst.	Böhm (1895)	epifaunal herbivore and/or detritus-feeder
Schwagerispira cf. mojsisovicsi (BÖCKH, 1872)	Brachiopod	Felsöörs Fm.	Vörös (2003)	pedunculate suspension-feeder
Schwagerispira fuchsi (KOKEN, 1900)	Brachiopod	Leidapo Mb.	Stiller (2001)	pedunculate suspension-feeder
Schwagerispira schwageri (BITTNER, 1890)	Brachiopod	Felsöörs Fm.	Vörös (2003)	pedunculate suspension-feeder
Schwagerispira subcircularis (YANG & XU, 1966)	Brachiopod	Leidapo Mb.	Stiller (2001)	pedunculate suspension-feeder
Scurria pelta BÖHM, 1895	Gastropod	Marmolada Lmst.	Böhm (1895)	epifaunal herbivore and/or detritus-feeder
Scurriopsis (Scurriopsis) n. sp. A	Gastropod	Leidapo Mb.	Stiller (2001)	epifaunal herbivore and/or detritus-feeder
Scurriopsis (Scurriopsis) n. sp. B	Gastropod	Leidapo Mb.	Stiller (2001)	epifaunal herbivore and/or detritus-feeder
Scythentolium anisicum FRIESENBICHLER, HAUTMANN, GRĂDINARU & BUCHER, 2019	Bivalve	Tubiphytes-Lmst. Mb.	Friesenbichler et al. (2019a)	epibyssate suspension-feeder
Scythentolium eurasiaticum (WITTENBURG, 1908)	Bivalve	Hidegkut Fm.	Broglio Loriga et al. (1990)	epibyssate suspension-feeder
Scythentolium scutigerulus HAUTMANN, BUCHER, BRÜHWILER, GOUDEMAND, KAIM & NÜTZEL, 2011	Bivalve	Luolou Fm., Daye Fm.	Hautmann et al. (2015), Foster et al. (2019)	epibyssate suspension-feeder
Scythentolium sp.	Bivalve	Lower Shale Unit	Brayard et al. (2017)	epibyssate suspension-feeder
Scythentolium sp.	Bivalve	Campil Mb., Val Badia Mb.	Hofmann et al. (2015)	epibyssate suspension-feeder
Scythentolium tirolicum (WITTENBURG, 1908)	Bivalve	Csopak Marl, Cencenighe Mb.	Broglio Loriga et al. (1990), Neri & Posenato (1985)	epibyssate suspension-feeder
Seisia trachyneritoides YIN & YOCHELSON, 1983	Gastropod	Leidapo Mb.	Yin & Yochelson (1983b)	epifaunal herbivore and/or detritus-feeder
Sementiconcha recuperator HAUTMANN, SMITH, MCGOWAN & BUCHER, 2013	Bivalve	Sinbad Fm., Virgin Fm.	Hautmann et al. (2013), Hofmann et al. (2013b, 2014)	shallow to moderately deep infaunal suspension-feeder
Septaliphorioidea paucicostata YANG & XU, 1966	Brachiopod	Leidapo Mb.	Stiller (2001)	pedunculate suspension-feeder
Septifer? sp.	Bivalve	Felsöörs Fm.	Vörös (2003)	epibyssate suspension-feeder
Serania? sp.	Bivalve	Felsöörs Fm.	Vörös (2003)	epibyssate suspension-feeder
Serpianotiaris coaeva (QUENSTEDT, 1873)	Echinoid	Trochitenkalk Fm., Meissner Fm.	Schmidt (1928, 1938), Hagdorn & Ockert (1993), Ockert (1993)	epifaunal herbivore and/or detritus-feeder
Serpula colubrina RÖDING, 1798	Serpulid	Jena Fm., Trochitenkalk Fm., Meissner Fm.	Schmidt (1928, 1938)	cemented epifaunal suspension-feeder
Serpula serpentina SCHMID & SCHLEIDEN, 1846	Serpulid	Meissner Fm.	Busse (1972)	cemented epifaunal suspension-feeder
Serpula socialis GOLDFUSS	Serpulid	Jena Fm., Trochitenkalk Fm., Meissner Fm.	Schmidt (1928, 1938)	cemented epifaunal suspension-feeder
Serpula? pygmaea MÜNSTER, 1841	Serpulid	Trochitenkalk Fm., Meissner Fm.	Schmidt (1928, 1938)	cemented epifaunal suspension-feeder
Serpulid indet.	Serpulid	Luolou Fm.	Hautmann et al. (2015)	cemented epifaunal suspension-feeder
Silesiacrinus parvus STILLER, 2000	Crinoid	Leidapo Mb.	Stiller (2001)	erected epifaunal suspension-feeder
Sinbadiella pygmaea HAUTMANN & NÜTZEL, 2005	Bivalve	Sinbad Fm.	Hofmann et al. (2014)	shallow to moderately deep infaunal suspension-feeder
Sinolingularia? huananensis PENG & SHI, 2008	Brachiopod	Daye Fm.	Foster et al. (2019)	shallow to moderately deep infaunal suspension-feeder
Sinolingularia? sp.	Brachiopod	Luolou Fm.	Hautmann et al. (2015)	shallow to moderately deep infaunal suspension-feeder
Sinorhynchia bifaceta YANG & XU, 1966	Brachiopod	Leidapo Mb.	Stiller (2001)	pedunculate suspension-feeder
Sinuarbullina yangouensis PAN, ERWIN, NÜTZEL & XIANG-SHUI, 2003	Gastropod	Deltadalen Mb.	Foster et al. (2017a)	epifaunal herbivore and/or detritus-feeder
Sinucosta pectinata (BITTNER, 1890)	Brachiopod	Felsöörs Fm.	Vörös (2003)	pedunculate suspension-feeder
Siphonophyla? sp.	Gastropod	Leidapo Mb.	Stiller (2001)	epifaunal herbivore and/or detritus-feeder
Sisenna inaequistriata NÜTZEL, KAIM & GRĂDINARU, 2018	Gastropod	Tubiphytes-Lmst. Mb.	Nützel et al. (2018)	epifaunal herbivore and/or detritus-feeder
Sisenna n. sp. A	Gastropod	Leidapo Mb.	Stiller (2001)	epifaunal herbivore and/or detritus-feeder
Sisenna sp.	Gastropod	Tubiphytes-Lmst. Mb.	Nützel et al. (2018)	epifaunal herbivore and/or detritus-feeder
Sisenna? n. sp. B	Gastropod	Leidapo Mb.	Stiller (2001)	epifaunal herbivore and/or detritus-feeder
Small cementing bivalve indet.	Bivalve	Leidapo Mb.	Stiller (2001)	cemented epifaunal suspension-feeder
Solemya abbreviata (FRECH, 1904)	Bivalve	Felsöörs Fm.	Vörös (2003)	deep infaunal suspension-feeder
Spinomarginifera sp.	Brachiopod	Tesero Oolithe	Broglio Loriga et al. (1986)	pedunculate suspension-feeder
Spiriferina (Mentzelia) ampla BITTNER, 1890	Brachiopod	Marmolada Lmst.	Salomon (1895)	pedunculate suspension-feeder
Spiriferina (Mentzelia) bittneri SALOMON, 1895	Brachiopod	Marmolada Lmst.	Salomon (1895)	pedunculate suspension-feeder
Spiriferina (Mentzelia) cf. spitiensis (STOLICZKA, 1865)	Brachiopod	Marmolada Lmst.	Salomon (1895)	pedunculate suspension-feeder
Spiriferina canavarica TOMMASI, 1885	Brachiopod	Marmolada Lmst.	Salomon (1895)	pedunculate suspension-feeder
Spiriferina cf. pectinata BITTNER , 1890	Brachiopod	Marmolada Lmst.	Salomon (1895)	pedunculate suspension-feeder
Spiriferina cf. pia BITTNER, 1890	Brachiopod	Marmolada Lmst.	Salomon (1895)	pedunculate suspension-feeder
Spiriferina fragilis (VON SCHLOTHEIM, 1813)	Brachiopod	Marmolada Lmst., Meissner Fm., Jena Fm., Felsöörs Fm.	Salomon (1895), Hagdorn & Mundlos (1982), Wagner (1897), Schmidt (1928, 1938), Vörös (2003)	pedunculate suspension-feeder
Spiriferina pia BITTNER, 1890	Brachiopod	Latemar Lmst., Marmolada Lmst.	Wilckens (1909), Salomon (1895)	pedunculate suspension-feeder
Spirigera (Anisactinella) cf. matutina BITTNER, 1902	Brachiopod	Latemar Lmst.	Friesenbichler et al. (unpublished data)	pedunculate suspension-feeder
Spirigera (Didymospira) marmorea BITTNER, 1890	Brachiopod	Marmolada Lmst.	Salomon (1895)	pedunculate suspension-feeder
Spirigera (Didymospira) quadriplecta (MÜNSTER, 1841)	Brachiopod	Marmolada Lmst.	Salomon (1895)	pedunculate suspension-feeder
Spirigera (Didymospira) stoppanii SALOMON, 1895	Brachiopod	Marmolada Lmst.	Salomon (1895)	pedunculate suspension-feeder
Spirigera (Didymospira) undata SALOMON, 1895	Brachiopod	Marmolada Lmst.	Salomon (1895)	pedunculate suspension-feeder
Spirigera (Didymospira) venetiana BITTNER, 1890	Brachiopod	Marmolada Lmst.	Salomon (1895)	pedunculate suspension-feeder
Spirigera (Diplospirella) wissmanni (MÜNSTER, 1841)	Brachiopod	Latemar Lmst.	Wilckens (1909)	pedunculate suspension-feeder
Spirochrysalis n. sp	Gastropod	Leidapo Mb.	Stiller (2001)	epifaunal herbivore and/or detritus-feeder
Spirochrysalis? subpyramidalis BÖHM, 1895	Gastropod	Marmolada Lmst.	Böhm (1895)	epifaunal herbivore and/or detritus-feeder
Spirorbis cf. valvata (GOLDFUSS, 1831)	Microconchid	Tesero Oolithe, Mazzin Mb.	Broglio Loriga et al. (1990)	cemented epifaunal suspension-feeder
Spirostylus cf. subcolumnaris (MÜNSTER, 1841)	Gastropod	Latemar Lmst.	Häberle (1908)	epifaunal herbivore and/or detritus-feeder
Spirostylus n. sp. indet. ex affin. Sp. retroscalati KITTL, 1894	Gastropod	Latemar Lmst.	Häberle (1908)	epifaunal herbivore and/or detritus-feeder
Spirostylus radiciformis BÖHM, 1895	Gastropod	Marmolada Lmst.	Böhm (1895)	epifaunal herbivore and/or detritus-feeder
Spirostylus retroscalatus KITTL, 1894	Gastropod	Latemar Lmst., Marmolada Lmst.	Böhm (1895), Häberle (1908)	epifaunal herbivore and/or detritus-feeder
Spirostylus sandbergeri MEISSNER	Gastropod	Jena Fm.	Schmidt (1928, 1938)	epifaunal herbivore and/or detritus-feeder
Spirostylus sp.	Gastropod	Marmolada Lmst.	Böhm (1895)	epifaunal herbivore and/or detritus-feeder
Spirostylus subcolumnaris (MÜNSTER, 1841)	Gastropod	Marmolada Lmst., Leidapo Mb.	Böhm (1895), Stiller (2001), Yin & Yochelson (1983c)	epifaunal herbivore and/or detritus-feeder
Spirostylus subcontractus KITTL, 1894	Gastropod	Marmolada Lmst.	Böhm (1895)	epifaunal herbivore and/or detritus-feeder
Spirostylus vittatus BÖHM, 1895	Gastropod	Marmolada Lmst.	Böhm (1895)	epifaunal herbivore and/or detritus-feeder
Stephanocosmia coronata VON WÖHRMANN & KOKEN, 1892	Gastropod	Schlernplateau beds	Wöhrmann & Koken (1892), Friesenbichler et al. (2019b)	epifaunal herbivore and/or detritus-feeder
Stereokion (Toxoconcha) mediocalcis HOHENSTEIN, 1913	Gastropod	"Middle Muschelkalk", Trochitenkalk Fm., Meissner Fm.	Schmidt (1928, 1938)	epifaunal herbivore and/or detritus-feeder
Stereokion (Toxoconcha) siliquoolithicum HOHENSTEIN, 1913	Gastropod	"Middle Muschelkalk", Trochitenkalk Fm., Meissner Fm.	Schmidt (1928, 1938)	epifaunal herbivore and/or detritus-feeder
Stomatopora? sp. A	Bryozoan	Leidapo Mb.	Stiller (2001)	cemented epifaunal suspension-feeder
Stomatopora? sp. B	Bryozoan	Leidapo Mb.	Stiller (2001)	cemented epifaunal suspension-feeder
Storthodon liscaviensis GIEBEL, 1856	Bivalve	Jena Fm.	Schmidt (1928, 1938)	shallow to moderately deep infaunal suspension-feeder
Straparollus? (Euomphalus) sp.	Gastropod	Leidapo Mb.	Yin & Yochelson (1983c)	epifaunal herbivore and/or detritus-feeder
Straparollus? franciscae YIN & YOCHELSON, 1983	Gastropod	Marmolada Lmst.	Böhm (1895)	epifaunal herbivore and/or detritus-feeder
Strobeus cf. paludinaeformis (HALL, 1858)	Gastropod	Sinbad Fm.	Batten & Stokes (1986)	epifaunal herbivore and/or detritus-feeder
Strobeus shigetai KAIM in SHIGETA ET AL., 2009	Gastropod	Zhitkov Fm.	Shigeta et al. (2009)	epifaunal herbivore and/or detritus-feeder
Stuorella antecedens KITTL, 1894	Gastropod	Marmolada Lmst.	Böhm (1895)	epifaunal herbivore and/or detritus-feeder
Stuorella infundibulum KITTL, 1894	Gastropod	Marmolada Lmst.	Böhm (1895)	epifaunal herbivore and/or detritus-feeder
Stuorella triplex BÖHM, 1895	Gastropod	Marmolada Lmst.	Böhm (1895)	epifaunal herbivore and/or detritus-feeder
Stuorella? cryptoschiza KITTL, 1894	Gastropod	Marmolada Lmst.	Böhm (1895)	epifaunal herbivore and/or detritus-feeder
Stutchburia sp.	Bivalve	Seis Mb.	Hofmann et al. (2015)	shallow to moderately deep infaunal suspension-feeder
Sulcatinella aff. incrassata (BITTNER, 1890)	Brachiopod	Tubiphytes-Lmst. Mb.	Grădinaru & Gaetani (2019)	pedunculate suspension-feeder
Sulcatinella incrassata (BITTNER, 1890)	Brachiopod	Felsöörs Fm.	Vörös (2003)	pedunculate suspension-feeder
Superstesaster promissor VILLIER, BRAYARD, BYLUND, JENKS, ESCARGUEL, OLIVIER, STEPHEN, VENNIN & FARA. 2018	Asteroid	Sinbad Fm.	Villier et al. (2018)	epifaunal carnivore
Tancredia beneckei PHILIPPI, 1898	Bivalve	Meissner Fm.	Schmidt (1928, 1938), Busse (1972)	shallow to moderately deep infaunal suspension-feeder
Tectospira chopi PICARD, 1904	Gastropod	Jena Fm.	Schmidt (1928, 1938)	epifaunal herbivore and/or detritus-feeder
Tectus? margine-nodoso BÖHM, 1895	Gastropod	Marmolada Lmst.	Böhm (1895)	epifaunal herbivore and/or detritus-feeder
Telleria antecedens KITTL, 1894	Gastropod	Marmolada Lmst.	Böhm (1895)	epifaunal herbivore and/or detritus-feeder
Telleria cf. antecedens KITTL, 1894	Gastropod	Latemar Lmst.	Häberle (1908)	epifaunal herbivore and/or detritus-feeder
Telleria cf. umbilicata KITTL, 1894	Gastropod	Latemar Lmst.	Häberle (1908)	epifaunal herbivore and/or detritus-feeder
Tellina? praenuntia (STOPPANI, 1860)	Bivalve	Marmolada Lmst.	Salomon (1895)	shallow to moderately deep infaunal suspension-feeder
Temnotropis credneri PICARD, 1903	Gastropod	Jena Fm.	Schmidt (1928, 1938)	epifaunal herbivore and/or detritus-feeder
Temnotropis parva PICARD, 1903	Gastropod	Erfurt Fm.	Schmidt (1928, 1938)	epifaunal herbivore and/or detritus-feeder
Terebratula (Coenothyris) ecki (FRANTZEN, 1882)	Brachiopod	Jena Fm.	Schmidt (1928, 1938)	pedunculate suspension-feeder
Terebratula cf. vulgaris (VON SCHLOTHEIM, 1820)	Brachiopod	Marmolada Lmst.	Salomon (1895)	pedunculate suspension-feeder
Terebratula predazzensis WILCKENS, 1909	Brachiopod	Latemar Lmst.	Friesenbichler et al. (unpublished data)	pedunculate suspension-feeder
Terquemia cf. difformis VON SCHLOTHEIM, 1823	Bivalve	Marmolada Lmst.	Salomon (1895)	cemented epifaunal suspension-feeder
Terquemiidae indet. (n. gen. et n. sp.?)	Bivalve	Leidapo Mb.	Stiller (2001)	cemented epifaunal suspension-feeder
Terquemiidae n. gen. A et. n. sp. A	Bivalve	Leidapo Mb.	Stiller (2001)	cemented epifaunal suspension-feeder
Terquemiidae n. gen. B et. n. sp. A	Bivalve	Leidapo Mb.	Stiller (2001)	cemented epifaunal suspension-feeder
Terquemiidae n. gen. B? et. n. sp. B	Bivalve	Leidapo Mb.	Stiller (2001)	cemented epifaunal suspension-feeder
Tetractinella trigonella (VON SCHLOTHEIM, 1820)	Brachiopod	Jena Fm., Felsöörs Fm., Trochitenkalk Fm., Latemar Lmst., Meissner Fm.	Schmidt (1928, 1938), Hagdorn & Mundlos (1982), Wilckens (1909), Ockert (1993), Szabó et al. (1979), Vörös (2003)	pedunculate suspension-feeder
Thecocyrtella horogensis PÁLFY, 2003	Brachiopod	Felsöörs Fm.	Vörös (2003)	pedunculate suspension-feeder
Thecocyrtelloidea tubulosa YANG & XU, 1966	Brachiopod	Leidapo Mb.	Stiller (2001)	cemented epifaunal suspension-feeder
Thracia regeli REIS	Bivalve	Trochitenkalk Fm., Meissner Fm.	Schmidt (1928, 1938)	deep infaunal suspension-feeder
Thrazia mactroides PHILIPPI, 1898	Bivalve	Röt Fm., Jena Fm., Meissner Fm.	Schmidt (1928, 1938)	shallow to moderately deep infaunal suspension-feeder
Tirolthilda n. sp. A	Gastropod	Leidapo Mb.	Stiller (2001)	epifaunal herbivore and/or detritus-feeder
Tofanellidae n. gen. A n. sp. A	Gastropod	Leidapo Mb.	Stiller (2001)	epifaunal herbivore and/or detritus-feeder
Tollmannicrinus saklibelensis (KRISTAN-TOLLMANN in KRISTAN-TOLLMANN & KRYSTYN, 1976)	Crinoid	Leidapo Mb.	Stiller (2001)	erected epifaunal suspension-feeder
Towapteria scythica (WIRTH, 1936)	Bivalve	Tesero Oolithe, Mazzin Mb., Luolou Fm., Daye Fm.	Hautmann et al. (2015), Broglio Loriga et al. (1990), Hofmann et al. (2015), Foster et al. (2019)	endobyssate suspension-feeder
Towapteria? sp.	Bivalve	Daye Fm.	Foster et al. (2019)	endobyssate suspension-feeder
Toxoconcha brocchii (STOPPANI, 1857)	Gastropod	"Middle Muschelkalk", Trochitenkalk Fm., Meissner Fm., Leidapo Mb.	Schmidt (1928, 1938), Stiller (2001), Yin & Yochelson (1983c)	epifaunal herbivore and/or detritus-feeder
Toxonema damesi BÖHM, 1895	Gastropod	Marmolada Lmst.	Böhm (1895)	epifaunal herbivore and/or detritus-feeder
Toxonema perspicuum BÖHM, 1895	Gastropod	Marmolada Lmst.	Böhm (1895)	epifaunal herbivore and/or detritus-feeder
Toxonema telescopium BÖHM, 1895	Gastropod	Marmolada Lmst.	Böhm (1895)	epifaunal herbivore and/or detritus-feeder
Toxonema transitorium (KITTL, 1894)	Gastropod	Marmolada Lmst.	Böhm (1895)	epifaunal herbivore and/or detritus-feeder
Toxonema uniformis (STOPPANI, 1858)	Gastropod	Latemar Lmst.	Friesenbichler et al. (unpublished data)	epifaunal herbivore and/or detritus-feeder
Trachybembix jovis (KITTL, 1894)	Gastropod	Marmolada Lmst.	Böhm (1895)	epifaunal herbivore and/or detritus-feeder
Trachybembix junonis (KITTL, 1894)	Gastropod	Marmolada Lmst.	Böhm (1895)	epifaunal herbivore and/or detritus-feeder
Trachybembix salomoni BÖHM, 1895	Gastropod	Marmolada Lmst.	Böhm (1895)	epifaunal herbivore and/or detritus-feeder
Trachynerita depressa (HÖRNES, 1856)	Gastropod	Marmolada Lmst.	Böhm (1895)	epifaunal herbivore and/or detritus-feeder
Trachynerita distincta (KITTL, 1895)	Gastropod	Leidapo Mb., Marmolada Lmst.	Stiller (2001), Yin & Yochelson (1983c), Böhm (1895)	epifaunal herbivore and/or detritus-feeder
Trachynerita fornoensis KITTL, 1894	Gastropod	Marmolada Lmst.	Böhm (1895)	epifaunal herbivore and/or detritus-feeder
Trachynerita gaillardoti (LEFROY, 1826)	Gastropod	Röt Fm., Jena Fm., Trochitenkalk Fm., Meissner Fm., Val Badia Mb., Cencenighe Mb., San Lucano Mb.	Schmidt (1928, 1938), Busse (1972), Broglio Loriga et al. (1990)	epifaunal herbivore and/or detritus-feeder
Trachynerita nodifera KITTL, 1894	Gastropod	Latemar Lmst., Marmolada Lmst.	Böhm (1895), Friesenbichler et al. (unpublished data)	epifaunal herbivore and/or detritus-feeder
Trachynerita sp.	Gastropod	Erfurt Fm.	Schmidt (1928, 1938)	epifaunal herbivore and/or detritus-feeder
Trachynerita sp. ind. aff. quadratae (STOPPANI) KOKEN, 1898	Gastropod	Trochitenkalk Fm., Meissner Fm.	Schmidt (1928, 1938)	epifaunal herbivore and/or detritus-feeder
Trachynerites sp.	Gastropod	Virgin Fm.	McGowan et al. (2009)	epifaunal herbivore and/or detritus-feeder
Trachypleura triadomarchica JAEKEL, 1900	Polyplacophore	Jena Fm.	Schmidt (1928, 1938)	epifaunal herbivore and/or detritus-feeder
Trachyspiridae indet.	Gastropod	Zhitkov Fm.	Shigeta et al. (2009)	epifaunal herbivore and/or detritus-feeder
Tretospira contraria BÖHM, 1895	Gastropod	Marmolada Lmst.	Böhm (1895)	epifaunal herbivore and/or detritus-feeder
Tretospira costata GRUBER, 1932	Gastropod	Trochitenkalk Fm., Meissner Fm.	Schmidt (1928, 1938)	epifaunal herbivore and/or detritus-feeder
Tretospira multistriata VON WÖHRMANN & KOKEN, 1892	Gastropod	Schlernplateau beds	Wöhrmann & Koken (1892), Friesenbichler et al. (2019b)	epifaunal herbivore and/or detritus-feeder
Tretospira striata (QUENSTEDT, 1867)	Gastropod	Meissner Fm.	Schmidt (1928, 1938)	epifaunal herbivore and/or detritus-feeder
Tretospira sulcata (VON ALBERTI, 1850)	Gastropod	Meissner Fm.	Schmidt (1928, 1938)	epifaunal herbivore and/or detritus-feeder
Triaphorus aff. multiformis KIPARISOVA, 1966	Bivalve	Lazurnaya Bay Fm., Zhitkov Fm.	Shigeta et al. (2009)	shallow to moderately deep infaunal suspension-feeder
Triassocirrus applanatus (KUTASSY, 1937)	Gastropod	Leidapo Mb.	Stiller (2001), Yin & Yochelson (1983c)	epifaunal herbivore and/or detritus-feeder
Triassocirrus guizhouensis YIN & YOLCHELSON, 1983	Gastropod	Leidapo Mb.	Stiller (2001), Yin & Yochelson (1983c)	epifaunal herbivore and/or detritus-feeder
Triassocirrus moellendorfi (KOKEN, 1900)	Gastropod	Leidapo Mb.	Stiller (2001), Yin & Yochelson (1983c)	epifaunal herbivore and/or detritus-feeder
Triassocirrus n. sp.	Gastropod	Leidapo Mb.	Stiller (2001)	epifaunal herbivore and/or detritus-feeder
Triassocirrus pichleri (LAUBE, 1869)	Gastropod	Leidapo Mb.	Yin & Yochelson (1983c)	epifaunal herbivore and/or detritus-feeder
Triassocirrus sp. A	Gastropod	Tubiphytes-Lmst. Mb.	Nützel et al. (2018)	epifaunal herbivore and/or detritus-feeder
Triassocirrus sp. B	Gastropod	Tubiphytes-Lmst. Mb.	Nützel et al. (2018)	epifaunal herbivore and/or detritus-feeder
Trichasteropsis weismanni (MÜNSTER, 1843)	Asteroid	Trochitenkalk Fm., Meissner Fm.	Schmidt (1928, 1938), Ockert (1993)	epifaunal carnivore
Trigonirhynchella attilina (BITTNER, 1890)	Brachiopod	Felsöörs Fm.	Vörös (2003)	pedunculate suspension-feeder
Trigonodus cf. orientalis BITTNER, 1899	Bivalve	Virgin Fm.	Hautmann et al. (2013)	shallow to moderately deep infaunal suspension-feeder
Trigonodus cf. sandbergeri VON ALBERTI, 1864	Bivalve	Virgin Fm.	Hautmann et al. (2013)	shallow to moderately deep infaunal suspension-feeder
Trigonodus costatus VON WÖHRMANN & KOKEN, 1892	Bivalve	Schlernplateau beds	Wöhrmann & Koken (1892), Friesenbichler et al. (2019b)	shallow to moderately deep infaunal suspension-feeder
Trigonodus minutus VON WÖHRMANN & KOKEN, 1892	Bivalve	Schlernplateau beds	Wöhrmann & Koken (1892), Friesenbichler et al. (2019b)	shallow to moderately deep infaunal suspension-feeder
Trigonodus orientalis BITTNER, 1899	Bivalve	Zhitkov Fm.	Shigeta et al. (2009)	shallow to moderately deep infaunal suspension-feeder
Trigonodus rablensis (GREDLER, 1862)	Bivalve	Schlernplateau beds	Wöhrmann & Koken (1892), Friesenbichler et al. (2019b)	shallow to moderately deep infaunal suspension-feeder
Trigonodus sandbergeri VON ALBERTI, 1864	Bivalve	Meissner Fm., Erfurt Fm.	Schmidt (1928, 1938), Urlichs (1992)	shallow to moderately deep infaunal suspension-feeder
Trigonodus securiformis (SANDBERGER, 1868)	Bivalve	Meissner Fm.	Schmidt (1928, 1938)	shallow to moderately deep infaunal suspension-feeder
Trigonodus? marmolatae SALOMON, 1895	Bivalve	Marmolada Lmst.	Salomon (1895)	shallow to moderately deep infaunal suspension-feeder
Trochidae n. gen. A n. sp. A	Gastropod	Leidapo Mb.	Stiller (2001)	epifaunal herbivore and/or detritus-feeder
Trypanostylus (Turristylus) triadicus KITTL, 1894	Gastropod	Latemar Lmst., Marmolada Lmst.	Häberle (1908)	epifaunal herbivore and/or detritus-feeder
Trypanostylus albertii (PHILIPPI, 1898)	Gastropod	Meissner Fm.	Schmidt (1928, 1938)	epifaunal herbivore and/or detritus-feeder
Trypanostylus ascendens (BÖHM, 1895)	Gastropod	Jena Fm., Marmolada Lmst.	Böhm (1985), Schmidt (1928, 1938)	epifaunal herbivore and/or detritus-feeder
Trypanostylus caravinensis KITTL, 1899	Gastropod	Latemar Lmst.	Häberle (1908)	epifaunal herbivore and/or detritus-feeder
Trypanostylus cf. haueri (GIEBEL, 1856)	Gastropod	Leidapo Mb.	Stiller (2001)	epifaunal herbivore and/or detritus-feeder
Trypanostylus cf. konincki (MÜNSTER, 1841)	Gastropod	Schlernplateau beds	Blaschke (1905)	epifaunal herbivore and/or detritus-feeder
Trypanostylus cf. konincki (MÜNSTER, 1841)	Gastropod	Latemar Lmst.	Häberle (1908)	epifaunal herbivore and/or detritus-feeder
Trypanostylus cf. turritelliformis (VON KLIPSTEIN, 1843)	Gastropod	Leidapo Mb.	Stiller (2001)	epifaunal herbivore and/or detritus-feeder
Trypanostylus cylindricus PICARD, 1903	Gastropod	Jena Fm.	Schmidt (1928, 1938)	epifaunal herbivore and/or detritus-feeder
Trypanostylus haueri (GIEBEL, 1856)	Gastropod	Jena Fm.	Schmidt (1928, 1938)	epifaunal herbivore and/or detritus-feeder
Trypanostylus konincki (MÜNSTER, 1841)	Gastropod	Marmolada Lmst., Leidapo Mb., Latemar Lmst., Jena Fm., Trochitenkalk Fm., Meissner Fm.	Böhm (1895), Stiller (2001), Häberle (1908), Friesenbichler et al. (unpublished data), Schmidt (1928, 1938)	epifaunal herbivore and/or detritus-feeder
Trypanostylus n. sp. A	Gastropod	Leidapo Mb.	Stiller (2001)	epifaunal herbivore and/or detritus-feeder
Trypanostylus n. sp. ASSMANN, 1924	Gastropod	Jena Fm.	Schmidt (1928, 1938)	epifaunal herbivore and/or detritus-feeder
Trypanostylus n. sp. B	Gastropod	Leidapo Mb.	Stiller (2001)	epifaunal herbivore and/or detritus-feeder
Trypanostylus n. sp. indet.	Gastropod	Latemar Lmst.	Häberle (1908), Friesenbichler et al. (unpublished data)	epifaunal herbivore and/or detritus-feeder
Trypanostylus picardi ASSMANN, 1924	Gastropod	Jena Fm.	Schmidt (1928, 1938)	epifaunal herbivore and/or detritus-feeder
Trypanostylus rectelineatus (PICARD, 1903)	Gastropod	Jena Fm.	Schmidt (1928, 1938)	epifaunal herbivore and/or detritus-feeder
Trypanostylus sp.	Gastropod	Erfurt Fm.	Schmidt (1928, 1938)	epifaunal herbivore and/or detritus-feeder
Trypanostylus sp.	Gastropod	Latemar Lmst.	Häberle (1908)	epifaunal herbivore and/or detritus-feeder
Trypanostylus submilitaris BLASCHKE, 1905	Gastropod	Schlernplateau beds	Friesenbichler et al. (2019b)	epifaunal herbivore and/or detritus-feeder
Trypanostylus? n. sp. C	Gastropod	Leidapo Mb.	Stiller (2001)	epifaunal herbivore and/or detritus-feeder
Turbinidae indet.	Gastropod	Tubiphytes-Lmst. Mb.	Nützel et al. (2018)	epifaunal herbivore and/or detritus-feeder
Turbinidae n. gen. A n. sp. A	Gastropod	Leidapo Mb.	Stiller (2001)	epifaunal herbivore and/or detritus-feeder
Turbinidae n. gen. B n. sp. A	Gastropod	Leidapo Mb.	Stiller (2001)	epifaunal herbivore and/or detritus-feeder
Turbinidae n. gen. C n. sp. A	Gastropod	Leidapo Mb.	Stiller (2001)	epifaunal herbivore and/or detritus-feeder
Turbo? toriniaeformis NOETLING, 1880	Gastropod	Jena Fm.	Schmidt (1928, 1938)	epifaunal herbivore and/or detritus-feeder
Turbonilla dubia BRONN	Gastropod	Jena Fm., Meissner Fm., Trochitenkalk Fm.	Wagner (1897)	epifaunal herbivore and/or detritus-feeder
Turbonilla gracilior VON SCHAUROTH, 1859?	Gastropod	Gastropod Oolithe, Cencenighe Mb., Tesero Oolithe, Trochitenkalk Fm., Meissner Fm., Jena Fm.	Broglio Loriga et al. (1986, 1990), Neri & Posenato (1985), Schmidt (1928, 1938), Wagner (1897)	epifaunal herbivore and/or detritus-feeder
Turbonilla? dubia MÜNSTER, 1841	Gastropod	Erfurt Fm.	Schmidt (1928, 1938)	epifaunal herbivore and/or detritus-feeder
Turbonitella gracillima BÖHM, 1895	Gastropod	Marmolada Lmst.	Böhm (1895)	epifaunal herbivore and/or detritus-feeder
Turritella bernardi KITTL, 1894	Gastropod	Marmolada Lmst.	Böhm (1895)	epifaunal herbivore and/or detritus-feeder
Turritella cf. Undularia carinata MÜNSTER	Gastropod	Jena Fm.	Wagner (1897)	epifaunal herbivore and/or detritus-feeder
Turritella liscaviensis PICARD, 1903	Gastropod	Jena Fm.	Schmidt (1928, 1938)	epifaunal herbivore and/or detritus-feeder
Turritella similis (MÜNSTER, 1841)	Gastropod	Jena Fm., "Middle Muschelkalk", Trochitenkalk Fm., Meissner Fm., Erfurt Fm.	Schmidt (1928, 1938)	epifaunal herbivore and/or detritus-feeder
Turritella striata PICARD, 1903	Gastropod	Jena Fm.	Schmidt (1928, 1938)	epifaunal herbivore and/or detritus-feeder
Turritella? oolithica E. PICARD, 1903	Gastropod	Trochitenkalk Fm., Meissner Fm.	Schmidt (1928, 1938)	epifaunal herbivore and/or detritus-feeder
Tylotrochus? sp. A	Gastropod	Leidapo Mb.	Stiller (2001)	epifaunal herbivore and/or detritus-feeder
Tyrolecrinus tyrolensis (LAUBE, 1865)	Crinoid	Leidapo Mb.	Stiller (2001)	erected epifaunal suspension-feeder
Tyrsoecus multinodosa YIN & YOLCHELSON, 1983	Gastropod	Leidapo Mb.	Stiller (2001), Yin & Yochelson (1983c)	epifaunal herbivore and/or detritus-feeder
Umbonium buetschlii HÄBERLE, 1908	Gastropod	Latemar Lmst.	Häberle (1908)	epifaunal herbivore and/or detritus-feeder
Umbonium sp.	Gastropod	Schlernplateau beds	Friesenbichler et al. (2019b)	epifaunal herbivore and/or detritus-feeder
Umbrostrea cristadifformis (VON SCHLOTHEIM, 1823)	Bivalve	Zuhanya Lmst.	Foster & Sebe (2017)	cemented epifaunal suspension-feeder
Umbrostrea? sp.	Bivalve	Tubiphytes-Lmst. Mb.	Friesenbichler et al. (2019a)	cemented epifaunal suspension-feeder
Undularia (Toxoconcha) n. sp.	Gastropod	Latemar Lmst.	Häberle (1908)	epifaunal herbivore and/or detritus-feeder
Undularia cf. tenuicarinata PICARD, 1903	Gastropod	Trochitenkalk Fm.	Ockert (1993)	epifaunal herbivore and/or detritus-feeder
Undularia concava PICARD, 1903	Gastropod	Trochitenkalk Fm., Meissner Fm.	Schmidt (1928, 1938)	epifaunal herbivore and/or detritus-feeder
Undularia dux PICARD, 1903	Gastropod	Jena Fm.	Schmidt (1928, 1938)	epifaunal herbivore and/or detritus-feeder
Undularia loxonemoides (KITTL, 1894)	Gastropod	Marmolada Lmst.	Böhm (1895)	epifaunal herbivore and/or detritus-feeder
Undularia obliquelineata KITTL, 1894	Gastropod	Marmolada Lmst.	Böhm (1895)	epifaunal herbivore and/or detritus-feeder
Undularia posttenuicarinata BUSSE, 1964	Gastropod	Trochitenkalk Fm.	Ockert (1993)	epifaunal herbivore and/or detritus-feeder
Undularia scalata (VON SCHLOTHEIM, 1823)	Gastropod	Marmolada Lmst., Jena Fm., Trochitenkalk Fm., Meissner Fm.	Böhm (1895), Schmidt (1928, 1938)	epifaunal herbivore and/or detritus-feeder
Undularia tenuicarinata PICARD, 1903	Gastropod	Jena Fm.	Schmidt (1928, 1938)	epifaunal herbivore and/or detritus-feeder
Unicardium credneri (GIEBEL, 1856)	Bivalve	Jena Fm.	Schmidt (1928, 1938)	shallow to moderately deep infaunal suspension-feeder
Unicardium rectangulare AHLBURG, 1906	Bivalve	Jena Fm., Trochitenkalk Fm., Meissner Fm.	Schmidt (1928, 1938)	shallow to moderately deep infaunal suspension-feeder
Unicardium schmidii (GEINITZ, 1842)	Bivalve	Röt Fm., Tubiphytes-Lmst. Mb., Jena Fm., Trochitenkalk Fm., Latemar Lmst., Meissner Fm., Erfurt Fm.	Friesenbichler et al. (2019a, unpublished data), Schmidt (1928, 1938), Busse (1972), Hagdorn & Ockert 1993), Ockert (1993)	shallow to moderately deep infaunal suspension-feeder
Unicardium? sp.	Bivalve	Virgin Fm.	Hautmann et al. (2013)	shallow to moderately deep infaunal suspension-feeder
Unionites aff. subrectus (BITTNER, 1901)	Bivalve	Deltadalen Mb.	Foster et al. (2017a)	shallow to moderately deep infaunal suspension-feeder
Unionites canalensis (CATULLO, 1848)	Bivalve	Deltadalen Mb., Hidegkut Fm., Mazzin Mb., Dinwoody Fm., Seis Mb., Gastropod Oolith, Campil Mb., Val Badia Mb., Cencenighe Mb., Csopak Marl, Lazurnaya Bay Fm., Zhitkov Fm., San Lucano Mb.	Bittner (1901), Broglio Loriga et al. (1990), Budai (2008), Hofmann et al. (2015), Shigeta et al. (2009), Foster et al. (2017a, b)	shallow to moderately deep infaunal suspension-feeder
Unionites cf. canalensis (CATULLO, 1846)	Bivalve	Sinbad Fm.	Hofmann et al. (2014)	shallow to moderately deep infaunal suspension-feeder
Unionites cf. donacinus (VON SCHLOTHEIM, 1820)	Bivalve	Seis Mb.	Foster et al. (2017b)	shallow to moderately deep infaunal suspension-feeder
Unionites cf. fassaensis (WISSMANN in MÜNSTER, 1841)	Bivalve	Luolou Fm.	Hautmann et al. (2015)	shallow to moderately deep infaunal suspension-feeder
Unionites cf. fassaensis (WISSMANN in MÜNSTER, 1841)	Bivalve	Sinbad Fm.	Hofmann et al. (2014)	shallow to moderately deep infaunal suspension-feeder
Unionites fassaensis (WISSMANN in MÜNSTER, 1841)	Bivalve	Hidegkut Fm., Mazzin Mb., Dinwoody Fm., Seis Mb., Gastropod Oolith, Campil Mb. Mb., Val Badia Mb., Cencenighe Mb., Virgin Fm., Csopak Marl, Lazurnaya Bay Fm., Zhitkov Fm., San Lucano Mb.	Broglio Loriga et al. (1986, 1990), Neri & Posenato (1985), Hofmann et al. (2013a, b, 2015), Foster et al. (2017b), Bittner (1901), Budai (2008), Shigeta et al. (2009)	shallow to moderately deep infaunal suspension-feeder
Unionites letticus (QUENSTEDT, 1852)	Bivalve	Meissner Fm., Erfurt Fm.	Schmidt (1928, 1938), Urlichs (1992)	shallow to moderately deep infaunal suspension-feeder
Unionites n. sp. A	Bivalve	Leidapo Mb.	Stiller (2001)	endobyssate suspension-feeder
Unionites n. sp. B	Bivalve	Leidapo Mb.	Stiller (2001)	endobyssate suspension-feeder
Unionites n. sp. C	Bivalve	Leidapo Mb.	Stiller (2001)	endobyssate suspension-feeder
Unionites subrectus (BITTNER, 1901)	Bivalve	Felsöörs Fm.	Vörös (2003)	shallow to moderately deep infaunal suspension-feeder
Unionites? canalensis (CATULLO, 1846)	Bivalve	Virgin Fm.	Hautmann et al. (2013)	shallow to moderately deep infaunal suspension-feeder
Unionites? cf. borealis (SPATH, 1935)	Bivalve	Virgin Fm.	Hautmann et al. (2013)	shallow to moderately deep infaunal suspension-feeder
Unionites? sp.	Bivalve	Luolou Fm.	Hautmann et al. (2015)	shallow to moderately deep infaunal suspension-feeder
Unionites? sp.	Bivalve	Latemar Lmst.	Friesenbichler et al. (unpublished data)	shallow to moderately deep infaunal suspension-feeder
Vermetidae n. gen. et n. sp. indet.	Gastropod	Leidapo Mb.	Stiller (2001)	epifaunal herbivore and/or detritus-feeder
Vermetus? triadicus GRUPE, 1907	Gastropod	Erfurt Fm.	Schmidt (1928, 1938)	epifaunal herbivore and/or detritus-feeder
Vermicularia? alternans BÖHM, 1895	Gastropod	Marmolada Lmst.	Böhm (1895)	epifaunal herbivore and/or detritus-feeder
Vermicularia? torsa BÖHM, 1895	Gastropod	Marmolada Lmst.	Böhm (1895)	epifaunal herbivore and/or detritus-feeder
Vernelia fenestravella BATTEN & STOKES, 1986	Gastropod	Sinbad Fm.	Batten & Stokes (1986)	epifaunal herbivore and/or detritus-feeder
Vernelia samae FOSTER, LEHRMANN, HIRTZ, WHITE, YU, LI & MARTINDALE, 2019	Gastropod	Daye Fm.	Foster et al. (2019)	epifaunal herbivore and/or detritus-feeder
Vetigastropoda indet.	Gastropod	Tubiphytes-Lmst. Mb.	Nützel et al. (2018)	epifaunal herbivore and/or detritus-feeder
Vistilia? paucivoluta YIN & YOCHELSON, 1983	Gastropod	Leidapo Mb.	Yin & Yochelson (1983a)	epifaunal herbivore and/or detritus-feeder
Volirhynchia productifrons (BITTNER, 1890)	Brachiopod	Felsöörs Fm.	Vörös (2003)	pedunculate suspension-feeder
Volirhynchia projectifrons (BITTNER, 1890)	Brachiopod	Felsöörs Fm.	Vörös (2003)	pedunculate suspension-feeder
Volirhynchia tommasii (BITTNER, 1890)	Brachiopod	Latemar Lmst., Felsöörs Fm.	Wilckens (1909), Vörös (2003)	pedunculate suspension-feeder
Volirhynchia vivida (BITTNER, 1890)	Brachiopod	Felsöörs Fm.	Vörös (2003)	pedunculate suspension-feeder
Waldheimia angusta (VON SCHLOTHEIM, 1820)	Brachiopod	Marmolada Lmst.	Salomon (1895)	pedunculate suspension-feeder
Waldheimia sp.	Brachiopod	Latemar Lmst.	Wilckens (1909)	pedunculate suspension-feeder
Waldheimia subangusta (MÜNSTER, 1841)	Brachiopod	Marmolada Lmst.	Salomon (1895)	pedunculate suspension-feeder
Wannerispira shangganensis KAIM & NÜTZEL in KAIM ET AL., 2010	Gastropod	Luolou Fm., Daye Fm.	Hautmann et al. (2015), Foster et al. (2019)	epifaunal herbivore and/or detritus-feeder
Warthia zakharovi KAIM in SHIGETA ET AL., 2009	Gastropod	Deltadalen Mb., Lazurnaya Bay Fm., Zhitkov Fm.	Shigeta et al. (2009), Foster et al. (2017a)	epifaunal herbivore and/or detritus-feeder
Weixiserpula weixi STILLER, 2000	Serpulid	Leidapo Mb.	Stiller (2001)	cemented epifaunal suspension-feeder
Wellerellidae n. gen. et n. sp. indet. A	Brachiopod	Lazurnaya Bay Fm.	Shigeta et al. (2009)	pedunculate suspension-feeder
Wellerellidae n. gen. et n. sp. indet. B	Brachiopod	Lazurnaya Bay Fm.	Shigeta et al. (2009)	pedunculate suspension-feeder
Werfenella rectecostata (VON HAUER, 1851)	Gastropod	Val Badia Mb., Cencenighe Mb., San Lucano Mb., Csopak Marl, Seis Mb., Szin Marl Fm.	Broglio Loriga et al. (1990), Budai (2008), Neri & Posenato (1985), Hofmann et al. (2015), Foster et al. (2015, 2017b)	epifaunal herbivore and/or detritus-feeder
Worthenia (Humiliworthenia) anisica NÜTZEL, KAIM & GRĂDINARU, 2018	Gastropod	Tubiphytes-Lmst. Mb.	Nützel et al. (2018)	epifaunal herbivore and/or detritus-feeder
Worthenia (Humiliworthenia) microstriata NÜTZEL, KAIM & GRĂDINARU, 2018	Gastropod	Tubiphytes-Lmst. Mb.	Nützel et al. (2018)	epifaunal herbivore and/or detritus-feeder
Worthenia (Worthenia) dobrogeana NÜTZEL, KAIM & GRĂDINARU, 2018	Gastropod	Tubiphytes-Lmst. Mb.	Nützel et al. (2018)	epifaunal herbivore and/or detritus-feeder
Worthenia (Worthenia) ecki ASSMANN, 1924	Gastropod	Leidapo Mb.	Yin & Yochelson (1983a)	epifaunal herbivore and/or detritus-feeder
Worthenia (Worthenia) ligylirae YIN & YOCHELSON, 1983	Gastropod	Leidapo Mb.	Yin & Yochelson (1983a)	epifaunal herbivore and/or detritus-feeder
Worthenia (Worthenia)? sp.	Gastropod	Tubiphytes-Lmst. Mb.	Nützel et al. (2018)	epifaunal herbivore and/or detritus-feeder
Worthenia albertii (VON ZIETEN, 1830)	Gastropod	Jena Fm., Meissner Fm., Erfurt Fm.	Schmidt (1928, 1938)	epifaunal herbivore and/or detritus-feeder
Worthenia apunctata KITTL, 1894	Gastropod	Marmolada Lmst.	Böhm (1895)	epifaunal herbivore and/or detritus-feeder
Worthenia arthaberi BLASCHKE, 1905	Gastropod	Schlernplateau beds	Blaschke (1905)	epifaunal herbivore and/or detritus-feeder
Worthenia bicarinata GRUBER, 1932	Gastropod	Trochitenkalk Fm., Meissner Fm.	Schmidt (1928, 1938), Hagdorn & Ockert (1993)	epifaunal herbivore and/or detritus-feeder
Worthenia cf. canalifera (MÜNSTER, 1841)	Gastropod	Marmolada Lmst.	Böhm (1895)	epifaunal herbivore and/or detritus-feeder
Worthenia cf. canalifera (MÜNSTER, 1841)	Gastropod	Sinbad Fm.	Batten & Stokes (1986)	epifaunal herbivore and/or detritus-feeder
Worthenia cf. elatior E. PICARD, 1903	Gastropod	Jena Fm.	Schmidt (1928, 1938)	epifaunal herbivore and/or detritus-feeder
Worthenia coronata (MÜNSTER, 1841)	Gastropod	Marmolada Lmst.	Böhm (1895)	epifaunal herbivore and/or detritus-feeder
Worthenia elatior PICARD, 1903	Gastropod	Jena Fm.	Schmidt (1928, 1938)	epifaunal herbivore and/or detritus-feeder
Worthenia gigas (KOKEN, 1898)	Gastropod	Jena Fm., Leidapo Mb.	Stiller (2001), Yin & Yochelson (1983a), Schmidt (1928, 1938)	epifaunal herbivore and/or detritus-feeder
Worthenia hausmanni (GOLDFUSS, 1844)	Gastropod	Jena Fm., Leidapo Mb., "Middle Muschelkalk"	Stiller (2001), Yin & Yochelson (1983a), Schmidt (1928, 1938)	epifaunal herbivore and/or detritus-feeder
Worthenia humilis BÖHM, 1895	Gastropod	Marmolada Lmst.	Böhm (1895)	epifaunal herbivore and/or detritus-feeder
Worthenia indifferens KITTL, 1894	Gastropod	Marmolada Lmst.	Böhm (1895)	epifaunal herbivore and/or detritus-feeder
Worthenia laevis PICARD, 1903	Gastropod	Jena Fm.	Schmidt (1928, 1938)	epifaunal herbivore and/or detritus-feeder
Worthenia latemarensis HÄBERLE, 1908	Gastropod	Latemar Lmst.	Häberle (1908)	epifaunal herbivore and/or detritus-feeder
Worthenia leysseri (GIEBEL, 1856)	Gastropod	Jena Fm.	Schmidt (1928, 1938)	epifaunal herbivore and/or detritus-feeder
Worthenia magna BÖHM, 1895	Gastropod	Marmolada Lmst.	Böhm (1895)	epifaunal herbivore and/or detritus-feeder
Worthenia marmolatae KITTL, 1894	Gastropod	Marmolada Lmst.	Böhm (1895)	epifaunal herbivore and/or detritus-feeder
Worthenia plutonis KITTL, 1894	Gastropod	Marmolada Lmst.	Böhm (1895)	epifaunal herbivore and/or detritus-feeder
Worthenia praerupta BÖHM, 1895	Gastropod	Marmolada Lmst.	Böhm (1895)	epifaunal herbivore and/or detritus-feeder
Worthenia pura ASSMANN, 1924	Gastropod	Jena Fm.	Schmidt (1928, 1938)	epifaunal herbivore and/or detritus-feeder
Worthenia reticulata GRUBER, 1932	Gastropod	Meissner Fm.	Schmidt (1928, 1938)	epifaunal herbivore and/or detritus-feeder
Worthenia sigaretoides KITTL, 1894	Gastropod	Marmolada Lmst.	Böhm (1895)	epifaunal herbivore and/or detritus-feeder
Worthenia sp.	Gastropod	Jena Fm., Meissner Fm.	Schmidt (1928, 1938)	epifaunal herbivore and/or detritus-feeder
Worthenia sp.	Gastropod	Lazurnaya Bay Fm.	Shigeta et al. (2009)	epifaunal herbivore and/or detritus-feeder
Worthenia sp.	Gastropod	Marmolada Lmst.	Böhm (1895)	epifaunal herbivore and/or detritus-feeder
Worthenia sp.	Gastropod	Val Badia Mb.	Hofmann et al. (2014)	epifaunal herbivore and/or detritus-feeder
Worthenia sp.	Gastropod	Latemar Lmst.	Häberle (1908)	epifaunal herbivore and/or detritus-feeder
Worthenia sp.	Gastropod	Virgin Fm.	McGowan et al. (2009)	epifaunal herbivore and/or detritus-feeder
Worthenia strigata BÖHM, 1894	Gastropod	Marmolada Lmst.	Böhm (1895)	epifaunal herbivore and/or detritus-feeder
Worthenia supraornata KITTL, 1894	Gastropod	Marmolada Lmst.	Böhm (1895)	epifaunal herbivore and/or detritus-feeder
Worthenia viezzenae HÄBERLE, 1908	Gastropod	Latemar Lmst.	Häberle (1908), Friesenbichler et al. (unpublished data)	epifaunal herbivore and/or detritus-feeder
Worthenia windowblindensis BATTEN & STOKES, 1986	Gastropod	Sinbad Fm.	Batten & Stokes (1986), Hofmann et al. (2014)	epifaunal herbivore and/or detritus-feeder
Worthenia? sp.	Gastropod	Latemar Lmst.	Häberle (1908)	epifaunal herbivore and/or detritus-feeder
Wortheniella conica (ASSMANN, 1937)	Gastropod	Leidapo Mb.	Stiller (2001), Yin & Yochelson (1983a)	epifaunal herbivore and/or detritus-feeder
Wortheniella extensus (YIN & YOLCHELSON, 1983)	Gastropod	Leidapo Mb.	Stiller (2001), Yin & Yochelson (1986)	epifaunal herbivore and/or detritus-feeder
Wortheniella johannisaustriae (VON KLIPSTEIN, 1843)	Gastropod	Leidapo Mb.	Stiller (2001), Yin & Yochelson (1983a)	epifaunal herbivore and/or detritus-feeder
Wortheniella laevilineata (YIN & YOCHELSON, 1983)	Gastropod	Leidapo Mb.	Stiller (2001)	epifaunal herbivore and/or detritus-feeder
Wortheniella n. sp. A	Gastropod	Leidapo Mb.	Stiller (2001)	epifaunal herbivore and/or detritus-feeder
Wortheniella n. sp. B	Gastropod	Leidapo Mb.	Stiller (2001)	epifaunal herbivore and/or detritus-feeder
Wortheniella n. sp. C	Gastropod	Leidapo Mb.	Stiller (2001)	epifaunal herbivore and/or detritus-feeder
Wortheniella n. sp. D	Gastropod	Leidapo Mb.	Stiller (2001)	epifaunal herbivore and/or detritus-feeder
Wortheniella n. sp. E	Gastropod	Leidapo Mb.	Stiller (2001)	epifaunal herbivore and/or detritus-feeder
Wortheniella n. sp. F	Gastropod	Leidapo Mb.	Stiller (2001)	epifaunal herbivore and/or detritus-feeder
Wortheniella n. sp. G	Gastropod	Leidapo Mb.	Stiller (2001)	epifaunal herbivore and/or detritus-feeder
Wortheniella nuda (KOKEN, 1900)	Gastropod	Leidapo Mb.	Stiller (2001), Yin & Yochelson (1983a)	epifaunal herbivore and/or detritus-feeder
Wortheniella qingyanensis (YU, PAN & WANG, 1974)	Gastropod	Leidapo Mb.	Stiller (2001)	epifaunal herbivore and/or detritus-feeder
Wortheniella regulocostata (YIN & YOLCHELSON, 1983)	Gastropod	Leidapo Mb.	Stiller (2001), Yin & Yochelson (1983a)	epifaunal herbivore and/or detritus-feeder
Wortheniella sp.	Gastropod	Leidapo Mb.	Stiller (2001)	epifaunal herbivore and/or detritus-feeder
Wortheniella tuberculifera (KOKEN, 1900)	Gastropod	Leidapo Mb.	Stiller (2001), Yin & Yochelson (1983a)	epifaunal herbivore and/or detritus-feeder
Wortheniella xui (YIN & YOLCHELSON, 1983)	Gastropod	Leidapo Mb.	Stiller (2001), Yin & Yochelson (1983a)	epifaunal herbivore and/or detritus-feeder
Wortheniella zardinii (YIN & YOCHELSON, 1983)	Gastropod	Leidapo Mb.	Stiller (2001), Yin & Yochelson (1986)	epifaunal herbivore and/or detritus-feeder
Wortheniopsis margarethae (KITTL, 1894)	Gastropod	Marmolada Lmst.	Böhm (1895)	epifaunal herbivore and/or detritus-feeder
Zygites n. sp.	Gastropod	Leidapo Mb.	Stiller (2001)	epifaunal herbivore and/or detritus-feeder
Zygites rotundinodosa YU, PAN & WANG, 1974	Gastropod	Leidapo Mb.	Stiller (2001)	epifaunal herbivore and/or detritus-feeder
Zygopleura arctecostata (MÜNSTER, 1841)	Gastropod	Latemar Lmst., Marmolada Lmst., Leidapo Mb., Schlernplateau beds	Häberle (1908), Böhm (1895), Wöhrmann & Koken (1892), Stiller (2001), Yin & Yochelson (1983c)	epifaunal herbivore and/or detritus-feeder
Zygopleura haasi BATTEN & STOKES, 1986	Gastropod	Sinbad Fm.	Batten & Stokes (1986)	epifaunal herbivore and/or detritus-feeder
Zygopleura rugosa BATTEN & STOKES, 1986	Gastropod	Sinbad Fm.	Batten & Stokes (1986)	epifaunal herbivore and/or detritus-feeder
Zygopleura sp.	Gastropod	Viganvar	Foster & Sebe (2017)	epifaunal herbivore and/or detritus-feeder
Zygopleura spinosa VON WÖHRMANN & KOKEN, 1892	Gastropod	Schlernplateau beds	Wöhrmann & Koken (1892), Friesenbichler et al. (2019b)	epifaunal herbivore and/or detritus-feeder
Zygopleura tenuis (MÜNSTER, 1841)	Gastropod	Leidapo Mb.	Stiller (2001)	epifaunal herbivore and/or detritus-feeder
Zygopleura walmstedti (VON KLIPSTEIN, 1843)	Gastropod	Leidapo Mb.	Stiller (2001), Yin & Yochelson (1983c)	epifaunal herbivore and/or detritus-feeder

## Sheet: References
Balini, M., Lucas, S.G., Jenks, J.F. and Spielmann, J.A. (2010). Triassic ammonoid biostratigraphy: an overview. Geological Society, London, Special Publications 334, 221–262.
Batten, R.L. and Stokes, W.M.L. (1986). Early Triassic gastropods from the Sinbad member of the Moenkopi Formation, San Rafael Swell, Utah. AmMusNov 2864, 1–33.
Bittner, A. (1901). Lamellibranchiaten aus der Trias des Bakonyer Waldes. Resultate der wissenschaftlichen Erforschung des Balatonsees, Anhang: Palaeontologie der Umgebung des Balatonsees II 3, 1–107.
Blaschke, F. (1905). Die Gastropodenfauna der Pachycardientuffe der Seiseralpe in Südtirol nebst einem Nachtrag zur Gastropodenfauna der roten Raibler Schichten auf dem Schlernplateau. Beiträge zur Paläontologie und Geologie Österreich-Ungarns und des Orients 17, 161–221.
Böhm, J. (1895). Die Gastropoden des Marmolatakalkes. Palaeontographica 42, 211–308.
Brack, P. and Rieber, H. (1993). Toward a better definition of the Anisian/Ladinian boundary: New biostratigraphic data and correlations of boundary sections from the Southern Alps. Eclogae Geologicae Helvetiae 86, 415–527.
Brack, P., Mundil, R., Oberli, F., Meier, M. and Rieber, H. (1996). Biostratigraphic and radiometric age data question the Milankovitch characteristics of the Latemar cycles (Southern Alps, Italy). Geology 24, 371–375.
Brayard, A., Krumenacker, L.J., Botting, J.P., Jenks, J.F., Bylund, K.G., Fara, E. et al. (2017). Unexpected Early Triassic marine ecosystem and the rise of the Modern evolutionary fauna. Science Advances 3, e1602159.
Broglio Loriga, C., Góczán, F., Haas, J., Lenner, K., Neri, C., Oravecz-Scheffer, A. et al. (1990). The Lower Triassic sequences of the Dolomites (Italy) and transdanubian mid-mountains (Hungary) and their correlation. Memorie di Scienze Geologiche 42, 41–103.
Budai, T. (2008). Geological excursions in the Alpine and Germanic Triassic facies areas of Hungary. Triassic Workshop 2008, Hungary, 50.
Busse, E. (1972). Fazies und Fauna des oberen Muschelkalkes von Willebadessen. Philippia 1, 110–126.
Emmerich, A., Zamparelli, V., Bechstädt, T. and Zühlke, R. (2005). The reefal margin and slope of a Middle Triassic carbonate platform: the Latemar (Dolomites, Italy). Facies 50, 573–614.
Foster, W.J. and Sebe, K. (2017). Recovery and diversification of marine communities following the late Permian mass extinction event in the western Palaeotethys. Global and Planetary Change 155, 165–177.
Foster, W.J., Danise, S. and Twitchett, R.J. (2017a). A silicified Early Triassic marine assemblage from Svalbard. Journal of Systematic Palaeontology 15, 851–877.
Foster, W.J., Danise, S., Price, G.D. and Twitchett, R.J. (2017b). Subsequent biotic crises delayed marine recovery following the late Permian mass extinction event in northern Italy. PLoS ONE 12, e0172321.
Foster, W.J., Danise, S., Sedlacek, A., Price, G.D., Hips, K. and Twitchett, R.J. (2015). Environmental controls on the post-Permian recovery of benthic, tropical marine ecosystems in western Palaeotethys (Aggtelek Karst, Hungary). Palaeogeography, Palaeoclimatology, Palaeoecology 440, 374–394.
Foster, W.J., Lehrmann, D.J., Hirtz, J.A., White, M., Yu, M., Li, J. and Martindale, R.C. (2019). Early Triassic benthic invertebrates from the Great Bank of Guizhou, South China: Systematic palaeontology and palaeobiology. Papers in Palaeontology 5, 1–44.
Friesenbichler, E., Hautmann, M., Grǎdinaru, E. and Bucher, H. (2021). A highly diverse bivalve fauna from a Bithynian (Anisian, Middle Triassic) Tubiphytes-microbial buildup in North Dobrogea (Romania). Papers in Palaeontology 1–49.
Friesenbichler, E., Hautmann, M., Nützel, A., Urlichs, M. and Bucher, H. (2019). Palaeoecology of Late Ladinian (Middle Triassic) benthic faunas from the Schlern/Sciliar and Seiser Alm/Alpe di Siusi area (South Tyrol, Italy). Paläontologische Zeitschrift 93, 1–29.
German Stratigraphic Commission (ed.; editing, coordination and layout: Menning, M. & Hendrich, A.) (2016): Stratigraphic Table of Germany 2016. Potsdam (German Research Centre for Geosciences)., (1) Table plain 100 x 141 cm, (2) Table folded A4. .
Grădinaru, E. and Gaetani, M. (2017). Spathian to Bithynian (Early to Middle Triassic) brachiopods from North Dobrogea (Romania) Spathian to Bithynian (Early to Middle Triassic) brachiopods from North Dobrogea (Romania). 11th Romanian Sposium on Palaeontology, 49.
Granier, B. R. C. and Grgasović, T. (2000). Les Algues Dasycladales du Permien et du Trias - Nouvelle tentative d’inventaire bibliographique, géographique et stratigraphique. Geologia Croatica 53, 1–197.
Häberle, D. (1908). Paläontologische Untersuchungen triadischer Gastropoden aus dem Gebiet von Predazzo. Verhandlungen des Naturhistorisch-Medizinischen Vereins zu Heidelberg 9, 1–630.
Hagdorn, H. and Mundlos, R. (1982). Autochthonschille im Oberen Muschelkalk (Mitteltrias) Südwestdeutschlands. Neues Jahrbuch für Geologie und Paläontologie, Abhandlungen 162, 332–351.
Hagdorn, H. and Ockert, W. (1993). "Encrinus liliiformis im Trochitenkalk Süddeutschlands" in Muschelkalk. Sonderbände Der Gesellschaft Für Naturkunde in Württemberg e.V. 2, Goldschneck-Verlag Werner K. Weidert, Stuttgart, Kolb, 245–260.
Hautmann, M. and Hagdorn, H. (2013). Oysters and oyster-like bivalves from the Middle Triassic Muschelkalk of the Germanic Basin. Paläontologische Zeitschrift 87, 19–32.
Hautmann, M., Smith, A.B., McGowan, A.J. and Bucher, H. (2013). Bivalves from the Olenekian (Early Triassic) of south-western Utah: Systematics and evolutionary significance. Journal of Systematic Palaeontology 11, 263–293.
Hautmann, M., Bagherpour, B., Brosse, M., Frisk, Å. M., Hofmann, R., Baud, A. (2015). Competition in slow motion: The unusual case of benthic marine communities in the wake of the end-Permian mass extinction. Palaeontology 58, 871–901.
Hofmann, R., Hautmann, M. and Bucher, H. (2013a). A new paleoecological look at the Dinwoody Formation (Lower Triassic, western USA): intrinsic versus extrinsic controls on ecosystem recovery after the end-Permian mass extinction. Journal of Paleontology 87, 854–880.
Hofmann, R., Hautmann, M., Wasmer, M. and Bucher, H. (2013b). Palaeoecology of the Spathian Virgin Formation (Utah, USA) and its implications for the Early Triassic recovery. Acta Palaeontologica Polonica 58, 149–173.
Hofmann, R., Hautmann, M. and Bucher, H. (2015). Recovery dynamics of benthic marine communities from the Lower Triassic Werfen Formation, northern Italy. Lethaia 48, 474–496.
Hofmann, R., Hautmann, M., Brayard, A., Nützel, A., Bylund, K.G., Jenks, J.F. (2014). Recovery of benthic marine communities from the end-Permian mass extinction at the low latitudes of eastern Panthalassa. Palaeontology 57, 547–589.
Komatsu, T., Chen, J.-H., Cao, M.Z., Stiller, F. and Naruse, H. (2004). Middle Triassic (Anisian) diversified bivalves: Depositional environments and bivalve assemblages in the Leidapo Member of the Qingyan Formation, southern China. Palaeogeography, Palaeoclimatology, Palaeoecology 208, 207–223.
Manfrin, S., Mietto, P. and Preto, N. (2005). Ammonoid biostratigraphy of the Middle Triassic Latemar platform (Dolomites, Italy) and its correlation with Nevada and Canada. Geobios 38, 477–504.
McGowan, A.J., Smith, A.B. and Taylor, P.D. (2009). Faunal diversity, heterogeneity and body size in the Early Triassic: Testing post-extinction paradigms in the Virgin Limestone of Utah, USA. Australian Journal of Earth Sciences 56, 859–872.
Neri, C. and Posenato, R. (1985). New biostratigraphical data on uppermost Werfen Formation of western Dolomites (Trento, Italy). Geologische und Paläontologische Mitteilungen Innsbruck 14, 83–107.
Ockert, W. (1993). "Die Zwergfaunaschichten (Unterer Hauptmuschelkalk, Trochitenkalk, mo1) im nordöstlichen Baden-Württemberg" in Muschelkalk. Sonderbände Der Gesellschaft Für Naturkunde in Württemberg e.V. 2, 117–215.
Ogilvie Gordon, M.M. (1927). Das Grödener-, Fassa- und Enneberggebiet in den Südtiroler Dolomiten. Geologische Bundesanstalt Wien.
Piros, O. and Preto, N. (2008). Dasycladalean algae distribution in ammonoid-bearing Middle Triassic platforms (Dolomites, Italy). Facies 54, 581–595.
Popa, L., Panaiotu, C.E. and Grǎdinaru, E. (2014). An early Middle Anisian (Middle Triassic) Tubiphytes and cement crusts-dominated reef from North Dobrogea (Romania): Facies, depositional environment and diagenesis. Acta Geologica Polonica 64, 189–206.
Russo, F., Mastandrea, A., Stefani, M. and Neri, C. (2000). Carbonate facies dominated by syndepositional cements: a key component of Middle Triassic platforms. The Marmolada case history (Dolomites, Italy). Facies 42, 211–226.
Salomon, W. (1895). Geologische und palaeontologische Studien über die Marmolata. Palaeontographica 42, 1–210.
Schmidt, M. (1928). Die Lebewelt unserer Trias. Hohenlohesche Buchhandlung F. Rau, Öhringen.
Schmidt, M. (1938). Die Lebewelt unserer Trias - Nachtrag. Hohenlohesche Buchhandlung F. Rau, Öhringen.
Shigeta, Y., Zakharov, Y.D., Maeda, H. and Popov, A.M. 2009. The Lower Triassic System in the Abrek Bay area, South Primorye, Russia. Vol. 38. National Museum of Nature and Science Monographs.
Stiller, F. (2001). Fossilvergesellschaftungen, Paläökologie und paläosynökologische Entwicklung im Oberen Anis (Mittlere Trias) von Qingyan, insbesondere Bangtoupo, Provinz Guizhou, Südwestchina. Münstersche Forschung zur Geologie und Paläontologie 92, 1–523.
Stiller, F. and Bucher, H. (2008). Anisian ammonoids from Qingyan, southwestern China: Biostratigraphical implications for the age of the Qingyan Formation. Swiss Journal of Geosciences 101, 547–562.
Szabó, I., Kovács, S., Lelkes, G. and Oravecz-Scheffer, A. (1979). Stratigraphic investigation of a (triassic) Pelsonian-Fassanian section at Felsőörs (Balaton Highland, Hungary). Rivista Italiana di Paleontologia e Stratigrafia 85, 789–806.
Urlichs, M. (1992). Vermeintlicher Zwergwuchs bei Muscheln aus dem untersten Trochitenkalk (Oberer Muschelkalk, Mitteltrias) Württembergs. Carolinea 50, 9–26.
Urlichs, M. (2014). A phylogenetic lineage of Myophoria kefersteini subspecies (Bivalvia) from the Late Ladinian to the Early Carnian (Triassic) in the Dolomites and Julian Alps (Italy). Neues Jahrbuch für Geologie und Paläontologie, Abhandlungen 274, 187–207.
Villier, L., Brayard, A., Bylund, K. G., Jenks, J. F., Escarguel, G., Olivier, N. et al. (2018). Supersteaster promissor gen. et sp. nov., a new starfish (Echinodermata, Asteroidea) from the Early Triassic of Utah, USA, filling a major gap in the phylogeny of asteroids. Journal of Systematic Palaeontology 16, 395–415.
Vörös, A. (2003). The Pelsonian Substage on the Balaton Highland (Middle Triassic, Hungary). Geologica Hungarica 55, 1–52.
Wagner, R. (1897). Beitrag zur genaueren Kenntnis des Muschelkalks bei Jena. Abhandlungen der Königlich Preussischen Geologischen Landesanstalt Neue Folge 27, 1–105.
Wilckens, R. (1909). Paläontologische Untersuchung triadischer Faunen aus der Umgebung von Predazzo in Südtirol. Verhandlungen des Naturhistorisch-Medizinischen Vereins Heidelberg 10, 81–231.
Wöhrmann, S. von and Koken, E. (1892). Die Fauna der Raibler Schichten vom Schlernplateau. Zeitschrift der Deutschen geologischen Gesellschaft 44, 167–223.
Yin, H.-F. and Yochelson, E.L. (1983a). Middle Triassic Gastropoda from Qingyan, Guizhou Province, China: 1 -Pleurotomariacea and Murchisoniacea. Journal of Paleontology 57, 162–187.
Yin, H.-F. and Yochelson, E.L. (1983b). Middle Triassic Gastropoda from Qingyan, Guizhou Province, China: 2. Trochacea and Neritacea. Journal of Paleontology 57, 515–538.
Yin, H.-F. and Yochelson, E.L. (1983c). Middle Triassic Gastropoda from Qingyan, Ghizhou Province, China: 3. Euomphalacea and Loxonematacea. Journal of Paleontology 57, 1098–1127.
Zatoń, M., Taylor, P.D. and Vinn, O. (2013). Early Triassic (Spathian) post-extinction microconchids from western Pangea. Journal of Paleontology 87, 159–165.
Zatoń, M., Hagdorn, H. and Borszcz, T. (2014). Microconchids of the species Microconchus valvatus (Münster in Goldfuss, 1831) from the Upper Muschelkalk (Middle Triassic) of Germany. Palaeobiodiversity and Palaeoenvironments 94, 453–461.
